# Supplementary material for: The meaning of life … cycles: lessons from and for safe by design studies
Source: Royal Society of Chemistry journal article supplement (doi:10.1039/d2gc02761e), 2022-01-01
Supplement: d2gc02761e1.xlsx [file d2gc02761e1.xlsx]

## Sheet: Summary sheet
Electronic Supplementary Information (ESI) to "The meaning of life … cycles: lessons from and for Safe by Design studies" by Jeroen B. Guinée, Reinout Heijungs, Martina G. Vijver, Willie J.G.M. Peijnenburg, Gara Villalba Mendez
1. Review of conceptual S(S)bD lit: this sheet provides the detailed results of our review of the 20 selected publications. This review includes a few more criteria than discussed in the paper.
2. Non-edited search result: this sheet provides all scholarly articles and chapters found based on a search in the Web of Science (WoS)™ on 13/04/2022 on the following keywords: TITLE: (“safe by design”) OR TITLE: (“safer by design”) OR TITLE: (“safe and sustainable by design”); TI=(safe by design) OR TI=(safer by design) OR TI=(safe and sustainable by design).
3. First screening: this sheet provides the results of applying the exclusion criteria discussed in the Method section to the "Non-edited serach result".
4. Second screening: this sheet provides the references that were excluded from the "First screening" results after a more detailed second screening; the reason for exclusion is provided in column K.
5. Plot of occurences: this sheet provides the background data of Figure 1.

## Sheet: 1. Review conceptual S(S)bD lit
Source					Criteria
Authors	Title	Journal, Volume, Issue	year	Abstract	Definition of SbD and/or SSbD	Chemicals, materials, or products?	Which LC is considered: chemical or product?	Methods linked to SbD/SSbD	Working method proposed?
Bastus, NG; Puntes, V	Nanosafety: Towards Safer Nanoparticles by Design	CURRENT MEDICINAL CHEMISTRY (25)35	2018	Background: Nanosafety aims for a solution through the safer design (and re-design) of nanostructured materials, optimizing both performance and safety, by resolving which structural features lead to the desired properties and modifying them to avoid their detrimental effects without losing their desired nanoscale properties in the process. Starting with known toxic NPs, the final aim should be t…	na	Engineered NanoMaterials (ENM) Products (6 hits): "new industrial and consumer products"; "for safe use of NPs in commercial products"; "engineers produce new materials and products"; "The idea is to develop the “safety by design” paradigm into a practically feasible “safety by redesign” paradigm, which can be implemented for products in the marketplace."; "personal care products" Material(s) (16…	It is unclear whether the authors mean LC of engineered inorganic nanoparticles (NPs) or LC of NPs in a final product. "A review of these strategies will help to provide guidelines for synthetic nanochemists on how to design NPs to be safe during their full life cycle while maintaining their parental desired properties." "Moreover, starting with known toxic NPs, the final aim should be the re-des…	na	na
Bottero, JY; Rose, J; de Garidel, C; Masion, A; Deutsch, T; Brochard, G; Carriere, M; Gontard, N; Wortham, H; Rabilloud, T; Salles, B; Dubosson, M; Cathala, B; Boutry, D; Ereskovsky, A; Auplat, C; Charlet, L; Heulin, T; Frejafon, E; Lanone, S	SERENADE: safer and ecodesign research and education applied to nanomaterial development, the new generation of materials safer by design	ENVIRONMENTAL SCIENCE-NANO (4)3	2017	SERENADE is a French project which aims to develop and apply the safer by design process to create safer nano-products. It achieves this goal by combining knowledge and scientific approaches from a range of disciplines towards this common goal. This tutorial review presents the conceptual approach to Safer by Design and provides several examples of case studies primarily for TiO2 (anatase) presen…	SbD: "Safer by design is not really defined but a generic concept based on the integration of the life cycle assessment into managing the environmental health security (EHS) in order to optimize the benefit/risk ratio in terms of societal and economic risks. This approach, which embraces economic and societal challenges when developing nano-enabled products by considering risk assessment across t…	nano chemicals and products; difference in meaning remains unclear Products (43 hits): "safer nano-products"; "the life cycle of nano-products"; "safer by design products as paints"; "nano-enabled products"; "product life cycle"; "safe use of products containing nanomaterials"; "product's risk and benefits"; "nano-by-products"; "intermediate product" Material(s) (16 hits): "nanomaterials"; "engin…	LC of nano-products (i.c. paints containing TiO2) but also life cycle of exposure is mentioned without any further explanation what that entails. "This article is devoted to some new data concerning the life cycle of nano-products in relation to the synthesis of safer by design products as paints containing TiO2." "This approach, which embraces economic and societal challenges when developing nan…		No, but without any references the following objectives of SbD are provided: • design of nanomaterials safer for both human health and the environment in order to promote the sustainable and responsible development and competitiveness of companies involved in nanotechnologies; • implementation of metrological tools for occupational workers, population and environmental media; • implementation of …
Caldeira, C. Farcal, L., Tosches D., Amelio, A., Rasmussen, K., Rauscher, H., Riego Sintes, J., Sala, S.	Framework for the definition of criteria and evaluation procedure for chemicals and materials - Draft Report for consultation	JRC Report D3 for SbD EU network	2022	Within the European Green Deal, the Chemicals Strategy for Sustainability (CSS) (EC, 2020a) identified a number of intervention to reduce impacts on human health and the environment associated with chemicals, materials, products and services commercialised or introduced in the EU market. In particular, the ambition of the CSS is to phase out the most harmful (not only SVHCs) substances and substi…	SbD: "In the context of Safe Innovation Approach (SIA), developed specifically for nanomaterials (Soeteman-Hernandez et al., 2019; OECD, 2020), SbD refers to identifying the risks and uncertainties concerning humans and the environment at an early phase of the innovation process. The SbD approach addresses the safety of the material/product and associated processes through the whole life cycle wi…	Chemicals, materials and products. However, "The SSbD framework proposed is a general approach for the definition of criteria for SSbD for chemicals and materials. It is broadly applicable allowing the definition of a set of operational criteria that can be implemented and that increase or ensure compliance with reference targets for safety and sustainability of chemicals and materials. It can be…	LC of chemical and material in product in first tier (step 1-3) and optionally LC of product in next tier (step 4) of framework proposed. What the difference is between the LC of a chemical and the LC of a material is not further explained. Moreover, whether or not they propose applying a full LCA, or only applying the LCIA methods in step 4 also remains unclear. Life cycle is not defined in the …	RA, LCA, LCC and S-LCA. "It is outside the scope of this report to provide suggestions for the definition of criteria to assess social and economic sustainability." "[...] the proposed SSbD framework to assess chemicals and materials follows a hierarchical or sequential approach in which safety aspects are considered first, followed by environmental, social and economic aspects." Social and econo…	5 step framework (what a popular term this is :-)) is proposed: Step 1- Safety of chemical and material - hazard-based approach; Step 2 - Chemical or material processing safety - occupational safety and health aspects; Step 3- Human health and environmental impacts from the use phase (direct exposure); Step 4 - Environmental sustainability assessment; Step 5 - Social and Economic Sustainability a…
Cobaleda-Siles, M; Guillamon, AP; Delpivo, C; Vazquez-Campos, S; Puntes, VF	Safer by design strategies	5TH NANOSAFE INTERNATIONAL CONFERENCE ON HEALTH AND SAFETY ISSUES RELATED TO NANOMATERIALS FOR A SOCIALLY RESPONSIBLE APPROACH (NANOSAFE 2016) (838)	2017	Throughout the EU funded FP7 project GUIDENano, we are trying to control and monitor the evolution of nano-enable products during their lifecycle. Small alterations of the nanoparticle (NP) state may have critical consequences on the NP behaviour and performance. For this reason it is important to highlight the importance of an extensive and proper characterization to define the NP physico-chemic…	SbD only: "safer-by-design approaches aim at the reduction of NMs hazard and exposure, the reduction of NMs migration and release, and the controlled degradation of these once they are released from their matrices"	NPs= Nanoparticles, but mentioned "products" and nanomaterials (NMs) mixed; this is very confusing. Products (13 hits): "nano-enabled products"; "safe/commercial/consumer products"; "product end of life"; "NPs are components embedded in a solid or liquid matrix forming part of different products"; Material(s) (11 hits): "nanomaterials (NMs)"; "In these studies, it is agreed that there is a need t…	NPs in this article refers to nanoparticles and NMs to nanomaterials. Both are not "final products", while the authors several times refer to the "life cycle of products". It's thus unclear what "life cycle" exactly refers to in this publication, see quotes below. "Throughout the EU funded FP7 project GUIDENano, we are trying to control and monitor the evolution of nano-enable products during the…	na	na
Dekkers, S; Wijnhoven, SWP; Braakhuis, HM; Soeteman-Hernandez, LG; Sips, AJAM; Tavernaro, I; Kraegeloh, A; Noorlander, CW (all from RIVM)	Safe-by-Design part I: Proposal for nanospecific human health safety aspects needed along the innovation process	NANOIMPACT (18)	2020	Safe-by-Design aims to reduce uncertainties and/or increase the human health and environmental safety from already early in the innovation process onwards and will thereby contribute to increased innovation efficiency, economic viability, interdisciplinary collaboration, consumers trust and improve sustainability. Since most innovators or designers are neither toxicologists nor risk assessors, co…	SbD only: "Safe-by-Design aims to reduce uncertainties and/or increase the human health and environmental safety from already early in the innovation process onwards and will thereby contribute to increased innovation efficiency, economic viability, interdisciplinary collaboration, consumers trust and improve sustainability." "The SbD concept intends to balance safety, functionality and cost in a…	Nano. All three terms - chemical, material and product - are used, mixed and not explicitly defined. Products (34 hits): "to assess nanospecific human health safety aspects of their product or material along the various stages of the innovation process"; "nanomaterials (NMs) and nano-enabled products (NEPs)"; "nanotechnology products"; "product or material development phase"; "the product"; "prin…	This study considers nanomaterials (NMs) throughout the life cycle of its nano-enabled products (NEPs; see last quotes below), but the authors don't explain any further if there is a difference between the LC of an NM and the LC of an NEP. Authors adopt the Cooper's Stage-Gate model; the first two stages of that model "comprise the scoping and building of the business case, whereas the principal …	Not really, rather a set of questions that are supposed to help the innovator/designer (see under "Working method proposed?").	Yes, this paper intends to provide just that (= a working method) as we learn from the abstract: "This paper provides sets of questions that can help innovators to assess nanospecific human health safety aspects of their product or material along the various stages of the innovation process. Addressing these questions will facilitate innovators to identify which type of information may support de…
Furxhi, I; Perucca, M; Blosi, M; de Ipina, JL; Oliveira, J; Murphy, F; Costa, AL	ASINA Project: Towards a Methodological Data-Driven Sustainable and Safe-by-Design Approach for the Development of Nanomaterials	FRONTIERS IN BIOENGINEERING AND BIOTECHNOLOGY (9)	2022	The novel chemical strategy for sustainability calls for a Sustainable and Safe-by-Design (SSbD) holistic approach to achieve protection of public health and the environment, industrial relevance, societal empowerment, and regulatory preparedness. Based on it, the ASINA project expands a data-driven Management Methodology (ASINA-SMM) capturing quality, safety, and sustainability criteria across t…	SbD: "Despite the fact that conceptions of SbD coexist, they all have the same purpose, to assess and increase safety in the development of NMs or Nano-Enabled Products (NEPs) as early as feasible into the production phase (Bottero et al., 2017; Schwarz-Plaschg et al., 2017)." "The primary SbD approach can be applied in different industries (e.g., paints and textiles) or used by regulators as a r…	Nano-Enabled Products (NEPs) Products (19 hits): "Nano-Enabled Products (NEPs)"; "product development stage/engineering/functionality/design"; "functionality of materials, products, and processes throughout their LC"; "Characterization during entire LC for Material-SSbD (M-SSbD): SSbD approach to materials/products"; Material(s) (15 hits): "materials selection"; "comparing materials and process d…	Life cycle of nano-enabled products. However, the NEP is not defined as a final or consumer-product, but focuses on the nano-part only as can be extracted from this quote: "We base the development of this methodology through value chains of highly representative classes of NEPs in the market, namely, (i) self-cleaning/air-purifying/ antimicrobial coatings and (ii) nano-structured capsules deliver…	RA, LCA, LCC "The expected improvement of the environmental and economic sustainability is based on LCA and LCC analyses. LCA is developed according to the standard (ISO:14040-14044) by using Ecoinvent 3.8 database with impact assessment CML 2001. LCC is carried out in parallel by considering the same functional unit employed for the environmental studies. It has to be considered that ASINA-ES (s…	Yes: "we elaborate a datadriven SSbD Management Methodology (ASINA-SMM) by (1) taking up and extending the principles of the SbD approach developed for nanotechnologies, (2) involving industrial actors responsible for its uptake, (3) bringing digital technologies to allow digitization of nanomanufacturing, and (4) applying optimization and decision support algorithms in design and re-design stage…
Hauschild, MZ; McKone, TE; Arnbjerg-Nielsen, K; Hald, T; Nielsen, BF; Mabit, SE; Fantke, P	Risk and sustainability: trade-offs and synergies for robust decision making	Environmental Sciences Europe (34)11	2022	Decisions about the development of new marketed technologies or products invariably come with consequences for economy, society and the environment. Environmental and health risk assessment on the one hand and sustainability assessment on the other hand are tools that offer different but complementary information about such consequences. Conflicts or synergies between the two tools may arise when…	SbD is not defined. SSbD definition is not provided but adopted from the EU Green Deal: "Assessment of risks and sustainability are important and complementary elements of decision support about system developments involving technology changes that may range from product lines and production systems over food value chains to societal infrastructure. Both are, furthermore, considered core componen…	All three terms are used, and quite consistently used although without any definitions. Sometimes it remains unclear what is meant, however. For example, when risk is defined - "Risk represents the combined information on the probability and severity of a consequence, and risk assessment is used to guide actions to avoid unacceptable consequences that technological systems may have for human heal…	82 hits on LC! LC of a product system or a material system ("the life cycle of the plastic materials"). "The assessment focus varies from the whole life cycle of the system (the life cycle perspective applied in sustainability assessment) to specific processes or activities (where the assessment of different risks is concentrated), and from specific impact types such as toxic impacts on human hea…	LCA and RA	A beginning is made, but it is a roadmap towards such a method, not yet the method itself.
Kraegeloh, A; Suarez-Merino, B; Sluijters, T; Micheletti, C	Implementation of Safe-by-Design for Nanomaterial Development and Safe Innovation: Why We Need a Comprehensive Approach	NANOMATERIALS (8)4	2018	Manufactured nanomaterials (MNMs) are regarded as key components of innovations in various fields with high potential impact (e.g., energy generation and storage, electronics, photonics, diagnostics, theranostics, or drug delivery agents). Widespread use of MNMs raises concerns about their safety for humans and the environment, possibly limiting the impact of the nanotechnology-based innovation. …	SbD: "“Safe-by-Design” (SbD) is a concept that is well established in fields like building, nuclear technology, water treatment, health facilities, and occupational health and safety. It describes safety measures for the prevention of accidents, illnesses, or environmental damage that are applied during the design stage of a facility, process, practice, material, or product. Generally, SbD is not…	Manufactured nanomaterials (MNMs) Products (25 hits): "nanoproducts"; "functional material or product"; "nano-products"; "nano-enabled products"; "what the potential exposure scenarios are for the MNM in the foreseen final product"; "nanomaterial-based products"; "greener product"; "product-oriented" Material(s) (25 hits): "Manufactured nanomaterials (MNMs)"; "functional material or product"; Che…	In this article LC refers to the LC of manufactured nanomaterials (MNMs) and to the LC of nanoproducts. If there is a difference between the LC of an NM and the LC of a nanoproduct is not further explained. But LC might also refer to MNMs throughout or along a nanoproduct's life cycle. MNMs are mentioned and also "nanoproducts" which most likely refers to the application of MNMs in final products…	RA only seriousely. Life cycle assessment is only used once in Table 1 presenting "Safe-by-Design (SbD) strategies described in scientific publications (2011–2018)."	Sort of …: "a new proactive approach is necessary, based on pre-regulatory safety assessment and dialogue between stakeholders."
Labille, J; Catalano, R; Slomberg, D; Motellier, S; Pinsino, A; Hennebert, P; Santaella, C; Bartolomei, V	Assessing Sunscreen Lifecycle to Minimize Environmental Risk Posed by Nanoparticulate UV-Filters - A Review for Safer-by-Design Products	FRONTIERS IN ENVIRONMENTAL SCIENCE (8) (vol 8, 101, 2020)	2020	Sunscreens are of emerging concern regarding environmental effect. After leaving the skin either through bathing or washing, the ingredients contained in the product formulation can be released into rivers, lakes, seashores, and/or sewage treatment plants. Nanomaterials used as UV-filters are of particular concern in this context as they may have a negative effect on these systems. To assess the …	SbD only and only implicitly defined without any reference: "Here we discuss how safe-by-design sunscreens can be developed by considering and minimizing the risk associated with ENMs at all stages of the cream lifecycle, from its manufacture to its end of life, through the consumer use and its effects on the exposed environment."	Nano. Chemical, material and product but mostly focusing on whole sunscreen product life cycle Products (90 hits): "product lifecycle/formulation/packaging/fate"; "sunscreen/cosmetic/nanotechnology-based/final/formulated/personal care/consumed/discarded product"; "the end of life of the product"; "the expected contrasted fates of the oily or aqueous by-products"; "sunscreen and its by-products"; …	LC in this article refers to product life cycle and explicitly including all parts and not just the nanomaterial part because. However, the study is is a review of the environmental risk associated with nanomaterials used as UV-filters in sunscreen, and is not an LCA with a functional unit etc. but it includes a plea for looking at the total product and not only at the NM. "A mixture effect exist…	RA and LCA, but not performed since this is a review. "Environmental Life Cycle Assessment (LCA) quantifies the environmental impacts associated with a good or service throughout its lifecycle, from raw material extraction, manufacturing, distribution and use, to final recycling and waste disposal. In the cosmetics industry, LCA and other life cycle thinking approaches such as Environmental-, Car…	No
Nguyen, AM; del Real, AEP; Durupthy, O; Lanone, S; Chaneac, C; Carenco, S	Risk Analysis and Technology Assessment of Emerging (Gd,Ce)(2)O2S Multifunctional Nanoparticles: An Attempt for Early Safer-by-Design Approach	NANOMATERIALS (12)3	2022	Acceptability and relevance of nanoparticles in the society is greatly improved using a safer-by-design strategy. However, this is difficult to implement when too late in the development process or when nanoparticles are already on the market (e.g., TiO2). We employ this strategy for emerging nanoparticles of lanthanide oxysulfide of formula (Gd,Ce)(2)O2S, relevant for photocatalysis as well as f…	SbD only: "SbD "consists of integrating knowledge of potential adverse effects into the process of designing manufactured materials at early stage of the life cycle, from their synthesis to their integration in functional products, their use, end-of-life and recycling."	Nano. Chemical, material and product are all mentioned but mostly materials, i.c. nanomaterials. Products (17 hits): "novel marketable/functional/cosmetic/high-tech/authorized/manufactured/existing/colored products"; "Hazards and fate of products"; "nanotechnology-based products"; "product conception"; Material(s) (33 material+59 nanaomaterial hits): "nanomaterials"; "all the results were used to…	Life cycle is only mentioned twice and it remains unclear to what it exactly relates. From one of the two uses of 'life quotes below, we derive that it relates to the 'life cycle of nanomaterials as applied in a functional product'. "It consists of integrating knowledge of potential adverse effects into the process of designing manufactured materials at early stage of the life cycle, from their s…	RA and Technology Assessment (TA)	No general working method, only in relation to this specific case study
Pavlicek, A; Part, F; Gressler, S; Rose, G; Gazso, A; Ehmoser, EK; Huber-Humer, M	Testing the Applicability of the Safe-by-Design Concept: A Theoretical Case Study Using Polymer Nanoclay Composites for Coffee Capsules	SUSTAINABILITY (13)24	2021	The production and use of engineered nanomaterials and nano-enabled products is increasing, enabling innovations in many application areas, e.g., in the sector of food contact materials. However, nanosafety-relevant information for chemical risk assessment is still scarce, leading to a high level of uncertainty and making the early integration of safety to the innovation process indispensable. Th…	SbD: "The nano-specific SbD concept, developed within the aforementioned projects (= NanoREG, NanoReg2, Prosafe), aims to identify the risks and uncertainties concerning human health and the environment at an early stage"; "Within this paper, the SbD concept is defined as an approach attempting to include sustainability aspects. Potential project risks that are difficult to predict during early i…	Nano. Products (41 hits): "nano-enabled products (NEPs)"; "industrial products"; "product life cycle"; "new materials and products (including ENMs and NEPs)"; "products containing nanamaterials"; "product safety"; "theoretical product example"; "thermoplastic products"; "product value chain"; "recycling products"; "transformation products"; "nanoproduct"; "Focus only on process risks and not on p…	Life cycle of a nano-enabled product, i.c. a coffee capsule. An MFA of nanoclays in coffee capsules was made as a theoretical example to identify exposure pathways and potential risks, which is kind of an unexpected mix between an LCA of a product (coffee capsules; normally including all substances and materials needed for a coffee capsule product) and an MFA of a chemical substance or material (…	chemical RA and MFA (?) of nanoclays. Is it an MFA?: "Through a concrete, albeit only theoretical, example, it was possible to collect safety-relevant data on nanoclay and conduct a material flow analysis (MFA), which enables the systematic description of nanoclay substance flows along the entire life cycle of coffee capsules (from plastic production to recycling or disposal) and to identify crit…	Touched upon in the Conclusions: "Nevertheless, the additionally conducted material flow analysis—which is not mandatory in the current SbD concept—can bring added value to the SbD concept. The MFA allowed the estimation of the market potential for ENMs and the identification of resulting material flows and exposure pathways along the entire life cycle of a nano-enabled product. However, the prac…
Rose, J; Auffan, M; de Garidel-Thoron, C; Artous, S; Auplat, C; Brochard, G; Capron, I; Carriere, M; Cathala, B; Charlet, L; Clavaguera, S; Heulin, T; Labille, J; Orsiere, T; Peyron, S; Rabilloud, T; Santaella, C; Truffier-Boutry, D; Wortham, H; Masion, A	The SERENADE project; a step forward in the safe by design process of nanomaterials: The benefits of a diverse and interdisciplinary approach	NANO TODAY (37)	2021	Developing safe nanomaterials has become a major concern in all the industry sectors using advanced materials. However, there are very few initiatives addressing this issue. The SERENADE project, with its long-term funding scheme, provided a unique opportunity to foster a coordinated, yet diverse approach to investigate the safe-by-design development of nanomaterials in a variety of application f…	SbD only: "Although there are many definitions of SbD, the general underlying concept is to minimize EHS (environment, health and safety) concerns by taking adequate measures early in the development of a product to control exposure and hazard, and thus risk (see e.g. [2]). For the purposes of the present article, SbD refers essentially on its technical aspects, and includes the terms Safe- and S…	nanomaterials. Chemical is only used as adjective (as in "chemical diversity"), products refer to products in which nanomaterials are applied, and key focus of the article is on materials as engineered nanomaterials (ENMs). Products (12 hits): "products that are on the market"; "reducing the quantity of nanomaterials within a product"; "the use or the disposal of the nanomaterials/product"; Mater…	LC of NM in a specific product is meant, since the focus is on NMs as applied in a number of (product case studies including food packaging, cosmetics and paint). "coordinated, yet diverse approach to investigate the safe-by-design development of nanomaterials in a variety of application fields, using a targeted set of inter-disciplinary case studies. The originality of the approach was to cover …	RA only	only related to the case studies performed
Rose, J; Auffan, M; De Garidel-Thoron, C; Artous, S; Brochard, G; Clavaguera, S; Truffier-Boutry, D; Wortham, H; Masion, A	The SERENADE project - A step forward in the Safe by Design process of nanomaterials: Moving towards a product-oriented approach	NANO TODAY (39)	2021	Recent research efforts have gone into formalizing and standardizing the Safe by Design process of nanomaterials. This usually results in a structured and (most often) sequential approach deliberately putting the focus on hazard and exposure issues regarding the nanomaterial itself in a bottom-up progression of material development. However, this general strategy lacks flexibility. Within the pro…	SbD only: "The strategy is clearly to address safety issues as early as possible in the R&D process to avoid problems further down the value chain."	Nano. The focus of this article is on the products in which nanomaterials are applied, instead of just on the nanomaterials only: "For instance, nanomaterials only represent an ingredient or a component of the overall product and their long- term stability will depend on the nano-matrix interactions. Exposure to nanomaterials should be controlled through encapsulation, use of embedding matrix or …	The LC of the product showing trade-offs of using a specific nanomaterial (i.c., TiO2) in a paint causing increased levels of volatile organic compounds (VOCs) emissions compared to focusing on the NMs only. [same as Labille et al in this sense thus] "This example examined the product (paint in this case) rather than the nanomaterials it contains", and shows the added trade-offs mapping ("high Ti…	RA only, no LCA although product focus is explicitly mentioned and nicely discussed.	First step taken, but does not constitute a working apporach yet.
Salieri, B; Barruetabena, L; Rodriguez-Llopis, I; Jacobsen, NR; Manier, N; Trouiller, B; Chapon, V; Hadrup, N; Jimenez, AS; Micheletti, C; Merino, BS; Brignon, JM; Bouillard, J; Hischier, R	Integrative approach in a safe by design context combining risk, life cycle and socio-economic assessment for safer and sustainable nanomaterials	NANOIMPACT (23)	2021	Moving towards safe and sustainable innovations is an international policy ambition. In the on-hand manuscript, a concept combining safe by design and sustainability was implemented through the integration of human and environmental risk assessment, life cycle assessment as well as an assessment of the economic viability. The result is a nested and iterative process in form of a decision tree tha…	SbD: "SbD for nanomaterials was initially defined within the FP7 project NANoREG (https://cordis.europa.eu/project/id/310584), where SbD was defined as a process enabling – at early stages – considerations of health and environmental safety in addition to functions in the design of a material, product or process (Gottardo et al., 2017)." SSbD (although not mentioned by this name and abbreviations…	Nanomaterials (NMs) and nano-enabled products (NEP) Products (38 hits): "product"; "chemical products" is an ambiguous combination of terms but a quote from Anastas, 1994 defining Green Chemistry); "new chemical products"; "product development"; "nano-enabled products"; "sustainable/safe/hazardous product"; Material(s) (33 hits): "nanomaterials"; "competitive/bulk materials"; "design of a materia…	LC of manufactured nanoparticle (NPs) and of the nano-enabled (in-between and final) product. This study has a similar aim as the Labille et al and Rose et al product-oriented studies: "The LCA study has been performed using three different perspectives – i.e. the manufacturing of the three NPs, the application of these NPs in the anode of a Li-Ion battery, and the use of these NP-containing batt…	RA + LCA + SEA "integrates these three elements in order to achieve sustainable, safe and competitive materials, products or services. This approach, embedded into the stage-gate-model for safe by design, allows to reduce the uncertainty related to the assessment of risks and impacts by improving the quality of the data collected along each stage." "The conceptual framework to identify safety fro…	"the project partners of the NanoReg2 project have developed a step-by-step process for the implementation of SbD to promote and foster a sustainable and safer production and application of nanotechnology. The step-by-step process aims to reduce uncertainties regarding safety while increasing the type of data requested as one moves along the innovation process, hence, moving from a qualitative as…
Sánchez-Jiménez, A; Puelles, R; Perez-Fernandez, M; Barruetabena, L; Jacobsen, NR; Suarez-Merino, B; Micheletti, C; Manier, N; Salieri, B; Hischier, R; Tsekovska, R; Handzhiyski, Y; Bouillard, J; Oudart, Y; Galea, KS; Kelly, S; Shandilya, N; Goede, H; Gomez-Cordon, J; Jensen, KA; van Tongeren, M; Apostolova, MD; Llopis, IR	Safe(r) by design guidelines for the nanotechnology industry	NANOIMPACT (25)	2022	Expectations for safer and sustainable chemicals and products are growing to comply with the United Nations and European strategies for sustainability. The application of Safe(r) by Design (SbD) in nanotechnology implies an iterative process where functionality, human health and safety, environmental and economic impact and cost are assessed and balanced as early as possible in the innovation pro…	SbD: "“NanoReg2” (http://www.NanoReg2.eu/) defined SbD “as a process that aims at identifying, estimating and reducing uncertainties and risks for humans and the environment along the entire value chain, ideally starting at an early stage of the innovation process” (Soeteman-Hernandez et al., 2019)." SSbD??: "basing Safe(r)-by-Design for nanotechnology on additional considerations besides hazard …	nanomaterials (NMs) and nano-enabled products (NEP) Products (37 hits): "safe(r) and sustainable chemicals and products"; "nano-enabled products (NEPs)"; "product lifecycle"; "by modifying the matrix, so there are no unwanted releases of the NM during use and the product is recyclable"; Material(s) (28 hits): "manufactured nanomaterials (NMs)"; "safe(r) and sustainable chemicals and products"; "a…	The life cycle of a nano-enabled product (NEP), of a nanomaterial (NM), and of an NM in a NEP. If there is a difference between these three types of LCs is not further explained. "This consists of evaluating the risks during all uses throughout the product lifecycle in order to optimize acceptable uses." "The challenge is to account for all the possible risks of the NM and NEP along their lifecyc…	RA and LCA and SEA	See Fig. 1 presenting a flow chart for the implementation of SbD in the manufacturing of nanomaterials. LCA: Life Cycle Assessment; TRLs: Technology Readiness Levels" and "Fig. 2. Step-by-step processes for the implementation of SbD. NEP: nano-enabled proudct; RA: Risk Assessment; LCA: Life Cycle Assessment; SEA: Socioeconomic Assessment; ITS: Intelligent Testing Strategy; SIA: Safe Innovation Ap…
Sánchez-Jiménez, A; Puelles, R; Perez-Fernandez, M; Gomez-Fernandez, P; Barruetabena, L; Jacobsen, NR; Suarez-Merino, B; Micheletti, C; Manier, N; Trouiller, B; Navas, JM; Kalman, J; Salieri, B; Hischier, R; Handzhiyski, Y; Apostolova, MD; Hadrup, N; Bouillard, J; Oudart, Y; Merino, C; Garcia, E; Liguori, B; Sabella, S; Rose, J; Masion, A; Galea, KS; Kelly, S; Stepankova, S; Mouneyrac, C; Barrick…	Safe(r) by design implementation in the nanotechnology industry	NANOIMPACT (20)	2020	The implementation of Safe(r) by Design (SbD) in industrial innovations requires an integrated approach where the human, environmental and economic impact of the SbD measures is evaluated across and throughout the nanomaterial (NM) life cycle. SbD was implemented in six industrial companies where SbD measures were applied to NMs, nano-enabled products (NEPs) and NM/NEP manufacturing processes. Th…	SbD: "SbD aims at identifying, estimating and reducing uncertainties and risks for humans and the environment along the entire value chain, ideally starting at an early stage of the innovation process (Dekkers et al. 2020, Soeteman-Hernandez et al. 2019, Kraegeloh et al. 2018). This concept advocates that safety should be considered as an integral part of the design process (together with functio…	nanomaterials and products, which are probably the same ?? Products (18 hits): "nano-enabled products (NEPs)"; "safer materials and products by design"; "product lifecycle/life time"; Material(s) (26 hits): "nanomaterial (NM)"; "manufactured nanomaterials (NMs)"; "safer/novel/alternative/solid/carbon materials"; "material property"; "material & energy input"; "design of the material"; "across all…	The life cycle of a nano-enabled product (NEP). However, also the life cycle of the NM is mentioned in the first sentence of the abstract and the life cycle of the NM in a NEP seems to be suggested below under "Pillar 2". If there is a difference between the LC of an NM (in an NEP) and the LC of an NEP is not further explained. "safer materials and products by design: This refers to identifying l…	RA and LCSA	"The approach considers human and environmental risks, functionality of the NM/NEP and costs as early as possible in the innovation process, continuing throughout the innovation progresses. Based on the results of the evaluation, a decision has to be made on whether to continue, stop or re-design the NM/NEP/process or to carry out further tests/obtain further data in cases where the uncertainty o…
Schmutz, M; Borges, O; Jesus, S; Borchard, G; Perale, G; Zinn, M; Sips, AAJAM; Soeteman-Hernandez, LG; Wick, P; Som, C	A Methodological Safe-by-Design Approach for the Development of Nanomedicines	FRONTIERS IN BIOENGINEERING AND BIOTECHNOLOGY (8)	2020	Safe-by-Design (SbD) concepts foresee the risk identification and reduction as well as uncertainties regarding human health and environmental safety in early stages of product development. The EU's NANoREG project and further on the H2020 ProSafe initiative, NanoReg2, and CALIBRATE projects have developed a general SbD approach for nanotechnologies (e.g., paints, textiles, etc.). Based on it, the…	SbD: SbD coexist, they share the purpose of assessing safety as early as possible in the innovation process of a nanomaterial or nanoproducts. They aim at reducing adverse effects on human health and the environment by altering nanoproduct design (Soeteman-Hernandez et al., 2019) and by ensuring safety along its lifecycle (Bottero et al., 2017; Kraegeloh et al., 2018). The SbD concept is therefor…	Nanomedicines, nanobiomaterials Products (16 hits): "product development/design/quality"; "nanoproducts"; "safe product"; "a product with proven effectiveness and the SbD would establish CQA that will lead to a product with high safety"; Material(s) (18 hits): "nanobiomaterials (NBMs)"; "nanomaterials"; "materials"; "valuable/safe materials"; "material design step"; "Material Design, Characteriza…	LC of nanoproduct but the term life cycle is only mentioned twice, once referring to a “nanoproduct design” and the other time it seems to refer to medicine safety. LC of nanoproduct BUT term life cycle is only mentioned twice, once as part of the SbD definition (see column F; "They aim at reducing adverse effects on human health and the environment by altering nanoproduct design (Soeteman-Hernan…	MFA and RA. MFA is mentioned only once in the main text and as part of Figure 1 but unfortunately not explained!	na
Semenzin, E; Giubilato, E; Badetti, E; Picone, M; Ghirardini, AV; Hristozov, D; Brunelli, A; Marcomini, A	Guiding the development of sustainable nano-enabled products for the conservation of works of art: proposal for a framework implementing the Safe by Design concept	ENVIRONMENTAL SCIENCE AND POLLUTION RESEARCH (26)25	2019	Nanotechnology provides innovative and promising solutions for the conservation of cultural heritage, but the development and application of new nano-enabled products pose concerns regarding their human health and environmental risks. To address these issues, we propose a sustainability framework implementing the Safe by Design concept to support product developers in the early steps of product d…	SbD: "The basic idea to implement the “safety by design” consists of anticipating potential human or environmental impacts of a new material or product, with the objective of modifying its design to avoid undesired properties while keeping the required functionalities. Since it was developed in a regulatory context, regulatory requirements, such as those included in REACH, Biocidal Products Regul…	Nano. Chemical, material and product all used, while chemical and material are often used mixed referring to the nanomaterial. Products (71 hits): "nano-enabled product"; "product developer"; "nano-based/new/conventional/final/innovative products"; "Even without specifically considering the inclusion of nanomaterials in conservation products, the use of chemical substances and mixtures, the fact …	LC refers to a nanomaterial (NM), but possibly the authors mean an NM in a specific product life cycle. LC refers to nanomaterial (NM) (step 1-4), but based on the last quotes below, they probably mean the "NM in a specific product life cycle", and the product life cycle in step 5 of their framework (but they don't aply LCA; see last quote below). "life cycle assessment (LCA)" "These pieces of le…	RA, MCDA, LCA, LCC and social LCA mentioned, but only RA is actually applied, see column F.
Tavernaro, I; Dekkers, S; Soeteman-Hernandez, LG; Herbeck-Engel, P; Noorlander, C; Kraegeloh, A	Safe-by-Design part II: A strategy for balancing safety and functionality in the different stages of the innovation process	NANOIMPACT (24)	2021	Manufactured nanomaterials have the potential to impact an exceedingly wide number of industries and markets ranging from energy storage, electronic and optical devices, light-weight construction to innovative medical approaches for diagnostics and therapy. In order to foster the development of safer nanomaterial-containing products, two main aspects are of major interest: their functional perfor…	"Safe-by-Design (SbD) actions: SbD actions are measures to improve safety in the context of the target innovation while maintaining functionality. The selection of the SbD action is based on the available information and should be suitable to design out hazard or to avoid release and exposure. Potential SbD actions are, for example, the use of alternative materials, changes in the production proc…	Nano. All three terms - chemical, material and product - are used, mixed and not explicitly defined, with a focus on "manufactured nanomaterials". Products (44 hits): "nanomaterial-containing products"; "nano-enabled products (NEPs)"; "consumer/final/cosmetic/prototype products"; "product functionality"; "principal product development"; "product idea/investments"; "by-products"; "It is important …	LC of the NM and of the NEP, but the authors possibly mean the NM in a specific product life cycle. Because they are "doing RA of the NM over the life cycle of the NP", and LCA is no part of their study. Explicit definitions provided: "NM, nanomaterials; NEP, nano-enabled products"; and "Life-Cycle: The life-cycle comprises the consecutive and interlinked stages of a product system, from raw mate…	RA, and LCA also mentioned but not applied	na
Tsalidis, GA; Soeteman-Hernandez, LG; Noorlander, CW; Saedy, S; Ommen JR van; Vijver, MG; Korevaar, G	Safe-and-Sustainable-by-Design Framework Based on a Prospective Life Cycle Assessment: Lessons Learned from a Nano-Titanium Dioxide Case Study	Int. J. Environ. Res. Public Health 2022, 19, 4241.	2022	Safe-and-sustainable-by-design (SSbD) is a concept that takes a systems approach by integrating safety, sustainability, and functionality throughout a product’s the life cycle. This paper proposes a framework based on a prospective life cycle assessment for early safety and sustainability assessment. The framework’s purpose is to identify environmental sustainability and toxicity hotspots early i…	SbD: The safe-by-design (SbD) concept refers to identifying the risks and uncertainties concerning humans and the environment at an early phase of the innovation process so as to minimize uncertainties, potential hazard(s), and/or exposure. The SbD approach addresses the safety of the material/product and associated processes throughout the whole life cycle: from the research and development phas…	Nano. Products and nano's as chemicals/materials Products (31 hits): "product's the life cycle"; "safety of the material/product"; "the “Sustainable-by-design” concept takes a systems approach by integrating the safety, circularity, and functionality of advanced materials, products, and processes throughout their life cycle"; "emerging products"; "safety of products"; "nano-products"; "nano-based…	LC refers to product life cycle as part of a prospective LCA. The article is about prospective LCA (limited to GW, CED, HTP and FEP: "the sustainability environmental impacts measured included global warming potential (GWP) and cumulative energy demand (CED), while the toxicity indicators included human toxicity potential (HTP) and freshwater ecotoxicity potential (FEP).") in a SSbD framework and…	LCA, but RA is not mentioned at all.	Framework proposed.

## Sheet: 2. Non-edited search result
Search in WoS on 13/04/2022 on the following keywords: TITLE: (“safe by design”) OR TITLE: (“safer by design”) OR TITLE: (“safe and sustainable by design”); TI=(safe by design) OR TI=(safer by design) OR TI=(safe and sustainable by design)
Publication Type	Authors	Book Authors	Book Editors	Book Group Authors	Author Full Names	Book Author Full Names	Group Authors	Article Title	Source Title	Book Series Title	Book Series Subtitle	Language	Document Type	Conference Title	Conference Date	Conference Location	Conference Sponsor	Conference Host	Author Keywords	Keywords Plus	Abstract	Addresses	Affiliations	Reprint Addresses	Email Addresses	Researcher Ids	ORCIDs	Funding Orgs	Funding Text	Cited References	Cited Reference Count	Times Cited, WoS Core	Times Cited, All Databases	180 Day Usage Count	Since 2013 Usage Count	Publisher	Publisher City	Publisher Address	ISSN	eISSN	ISBN	Journal Abbreviation	Journal ISO Abbreviation	Publication Date	Publication Year	Volume	Issue	Part Number	Supplement
J	Packroff, R; Marx, R				Packroff, Rolf; Marx, Romy			Safe and Sustainable by Design-An Interdisciplinary Challenge for Future-Proof Chemistry	CHEMPLUSCHEM												Advanced materials (such as the TiO2 fibers shown) are important building blocks for a post-fossil circular economy that is fostered by the Horizon Europe research framework programme from 2021 to 2026. Rolf Packroff and Romy Marx outline how this increases the need for scientists in material development to address issues of safe and sustainable design, as well as interdisciplinary cooperation wi…						Packroff, Rolf/0000-0003-4401-3738												2192-6506					MAR	2022	87	3
J	Brennan, ME; Valsami-Jones, E				Brennan, Maurice Edward; Valsami-Jones, Eugenia			Safe by Design for Nanomaterials-Late Lessons from Early Warnings for Sustainable Innovation	NANOETHICS												The Safe by Design conceptual initiative being developed for nanomaterials offers a template for a new sustainable innovation approach for advanced materials with four important sustainability characteristics. Firstly, it requires potential toxicity risks to be evaluated earlier in the innovation cycle simultaneously with its chemical functionality and possible commercial applications. Secondly, …					Valsami-Jones, Eugenia/I-1736-2016	Valsami-Jones, Eugenia/0000-0002-8850-7556												1871-4757	1871-4765				AUG	2021	15	2
J	Salieri, B; Barruetabena, L; Rodriguez-Llopis, I; Jacobsen, NR; Manier, N; Trouiller, B; Chapon, V; Hadrup, N; Jimenez, AS; Micheletti, C; Merino, BS; Brignon, JM; Bouillard, J; Hischier, R				Salieri, Beatrice; Barruetabena, Leire; Rodriguez-Llopis, Isabel; Jacobsen, Nicklas Raun; Manier, Nicolas; Trouiller, Benedicte; Chapon, Valentin; Hadrup, Niels; Jimenez, Araceli Sanchez; Micheletti, Christian; Merino, Blanca Suarez; Brignon, Jean-Marc; Bouillard, Jacques; Hischier, Roland			Integrative approach in a safe by design context combining risk, life cycle and socio-economic assessment for safer and sustainable nanomaterials	NANOIMPACT												Moving towards safe and sustainable innovations is an international policy ambition. In the on-hand manuscript, a concept combining safe by design and sustainability was implemented through the integration of human and environmental risk assessment, life cycle assessment as well as an assessment of the economic viability. The result is a nested and iterative process in form of a decision tree tha…					Trouiller, Bénédicte/AFY-4095-2022; Salieri, Beatrice/ABA-9258-2020	Trouiller, Bénédicte/0000-0003-4367-2870; Salieri, Beatrice/0000-0002-8338-6206; Hadrup, Niels/0000-0002-1188-445X; Rodriguez-Llopis, Isabel/0000-0003-1514-4800												2452-0748					JUL	2021	23
C	Boulanger, P; Belkadi, L; Descarpentries, J; Porterat, D; Hibert, E; Brouzes, A; Mille, M; Patel, S; Pinault, M; Reynaud, C; Mayne-L'Hermite, M; Decamps, JM			IOP	Boulanger, P.; Belkadi, L.; Descarpentries, J.; Porterat, D.; Hibert, E.; Brouzes, A.; Mille, M.; Patel, S.; Pinault, M.; Reynaud, C.; Mayne-L'Hermite, M.; Decamps, J. M.			Towards large scale aligned carbon nanotube composites: an industrial safe-by-design and sustainable approach	NANOSAFE 2012: INTERNATIONAL CONFERENCES ON SAFE PRODUCTION AND USE OF NANOMATERIALS	Journal of Physics Conference Series				3rd International Conference on Safe Production and Use of Nanomaterials (Nanosafe)	NOV 13-15, 2012	Minatec, Grenoble, FRANCE		Minatec			We present the main results demonstrating the feasibility of high surface (> A4 format size) semi-industrial fabrication of composites embedding VACNT in organic matrices. The process of growing VACNT exhibits several advantages regarding safety issues: integrating de facto a safe collecting procedure on the substrate, avoiding additional preparation steps and simplifying handling and protection …					REYNAUD, Cecile/J-9969-2014	REYNAUD, Cecile/0000-0003-4646-9405; Pacchini, Sebastien/0000-0001-5119-7868												1742-6588	1742-6596					2013	429
J	Jantunen, P; Rauscher, H; Sintes, JR; Rasmussen, K				Jantunen, Paula; Rauscher, Hubert; Sintes, Juan Riego; Rasmussen, Kirsten			Commentary on Safe(r) by design implementation in the nanotechnology industry [NanoImpact 20 (2020) 100267] and Integrative approach in a safe by design context combining risk, life cycle and socio-economic assessment for safer and sustainable nanomaterials [NanoImpact 23 (2021) 100335]	NANOIMPACT												Commentary on two recent papers published in NanoImpact Safe(r) by design implementation in the nano -technology industry and Integrative approach in a safe by design context combining risk, life cycle and socio-economic assessment for safer and sustainable nanomaterials.																		2452-0748					OCT	2021	24
J	Anastas, PT; Zimmerman, JB				Anastas, Paul T.; Zimmerman, Julie B.			Safer by Design	GREEN CHEMISTRY																	Anastas, Paul/L-3258-2013	Anastas, Paul/0000-0003-4777-5172; Zimmerman, Julie/0000-0002-5392-312X												1463-9262	1463-9270					2016	18	16
J	Furxhi, I; Perucca, M; Blosi, M; de Ipina, JL; Oliveira, J; Murphy, F; Costa, AL				Furxhi, Irini; Perucca, Massimo; Blosi, Magda; Lopez de Ipina, Jesus; Oliveira, Juliana; Murphy, Finbarr; Costa, Anna Luisa			ASINA Project: Towards a Methodological Data-Driven Sustainable and Safe-by-Design Approach for the Development of Nanomaterials	FRONTIERS IN BIOENGINEERING AND BIOTECHNOLOGY												The novel chemical strategy for sustainability calls for a Sustainable and Safe-by-Design (SSbD) holistic approach to achieve protection of public health and the environment, industrial relevance, societal empowerment, and regulatory preparedness. Based on it, the ASINA project expands a data-driven Management Methodology (ASINA-SMM) capturing quality, safety, and sustainability criteria across t…																		2296-4185					JAN 28	2022	9
C	Cobaleda-Siles, M; Guillamon, AP; Delpivo, C; Vazquez-Campos, S; Puntes, VF			IOP	Cobaleda-Siles, M.; Guillamon, A. P.; Delpivo, C.; Vazquez-Campos, S.; Puntes, V. F.			Safer by design strategies	5TH NANOSAFE INTERNATIONAL CONFERENCE ON HEALTH AND SAFETY ISSUES RELATED TO NANOMATERIALS FOR A SOCIALLY RESPONSIBLE APPROACH (NANOSAFE 2016)	Journal of Physics Conference Series				5th Nanosafe International Conference on Health and Safety Issues Related to Nanomaterials for a Socially Responsible Approach (NANOSAFE)	NOV 07-10, 2016	Grenoble, FRANCE					Throughout the EU funded FP7 project GUIDENano, we are trying to control and monitor the evolution of nano-enable products during their lifecycle. Small alterations of the nanoparticle (NP) state may have critical consequences on the NP behaviour and performance. For this reason it is important to highlight the importance of an extensive and proper characterization to define the NP physico-chemic…					Puntes, Victor/AAL-6081-2021	Puntes, Victor/0000-0001-8996-9499; delpivo, camilla/0000-0002-4413-7602												1742-6588	1742-6596					2017	838
J	Schwarz-Plaschg, C; Kallhoff, A; Eisenberger, I				Schwarz-Plaschg, Claudia; Kallhoff, Angela; Eisenberger, Iris			Making Nanomaterials Safer by Design?	NANOETHICS																		Kallhoff, Angela/0000-0001-6154-1298; Schwarz-Plaschg, Claudia/0000-0001-9004-9550; Eisenberger, Iris/0000-0001-9685-426X												1871-4757	1871-4765				DEC	2017	11	3
J	Bastus, NG; Puntes, V				Bastus, Neus G.; Puntes, Victor			Nanosafety: Towards Safer Nanoparticles by Design	CURRENT MEDICINAL CHEMISTRY												Background: Nanosafety aims for a solution through the safer design (and re-design) of nanostructured materials, optimizing both performance and safety, by resolving which structural features lead to the desired properties and modifying them to avoid their detrimental effects without losing their desired nanoscale properties in the process. Starting with known toxic NPs, the final aim should be t…					Bastús, Neus G./J-2407-2012; Puntes, Victor/AAL-6081-2021; Bastús, Neus G./AAK-8755-2020	Bastús, Neus G./0000-0002-3144-7986; Puntes, Victor/0000-0001-8996-9499; Bastús, Neus G./0000-0002-3144-7986												0929-8673	1875-533X					2018	25	35
J	Yan, L; Zhao, F; Wang, J; Zu, Y; Gu, ZJ; Zhao, YL				Yan, Liang; Zhao, Feng; Wang, Jing; Zu, Yan; Gu, Zhanjun; Zhao, Yuliang			A Safe-by-Design Strategy towards Safer Nanomaterials in Nanomedicines	ADVANCED MATERIALS												The marriage of nanotechnology and medicine offers new opportunities to fight against human diseases. Benefiting from their unique optical, thermal, magnetic, or redox properties, a wide range of nanomaterials have shown potential in applications such as diagnosis, drug delivery, or tissue repair and regeneration. Despite the considerable success achieved over the past decades, the newly emerging…					Gu, Zhanjun/A-7592-2013	Gu, Zhanjun/0000-0003-3717-2423; Zhao, Feng/0000-0001-8567-7501; Yan, Liang/0000-0003-2925-5544; Zu, Yan/0000-0001-5465-3718												0935-9648	1521-4095				NOV	2019	31	45
J	van de Poel, I; Robaey, Z				van de Poel, Ibo; Robaey, Zoe			Safe-by-Design: from Safety to Responsibility	NANOETHICS												Safe-by-design (SbD) aims at addressing safety issues already during the R&D and design phases of new technologies. SbD has increasingly become popular in the last few years for addressing the risks of emerging technologies like nanotechnology and synthetic biology. We ask to what extent SbD approaches can deal with uncertainty, in particular with indeterminacy, i.e., the fact that the actual saf…					van de Poel, Ibo/ABB-9362-2020; Robaey, Zoë/AAT-3455-2020	/0000-0002-9553-5651												1871-4757	1871-4765				DEC	2017	11	3
J	Gautam, M; Park, DH; Park, SJ; Nam, KS; Park, GY; Hwang, J; Yong, CS; Kim, JO; Byeon, JH				Gautam, Milan; Park, Dae Hoon; Park, Sung Jae; Nam, Kang Sik; Park, Geun Young; Hwang, Jungho; Yong, Chul Soon; Kim, Jong Oh; Byeon, Jeong Hoon			Plug-In Safe-by-Design Nanoinorganic Antibacterials	ACS NANO												Due to antimicrobial resistance and the adverse health effects that follow broad and inappropriate use of antibacterial agents, new classes of antibacterials with broad and strong bactericidal activity and safety for human use are urgently required globally, increasingly so with the onset of climate change. However, R&D in this field is known to be rarely profitable, unless a cost-effective, flex…					Gautam, Milan/AAC-9295-2020; Park, Dae Hoon/L-5693-2018	Gautam, Milan/0000-0002-3817-620X; Park, Dae Hoon/0000-0002-5886-3330												1936-0851	1936-086X				NOV	2019	13	11
J	Sealy, C				Sealy, Cordelia			'Safe-by-design' nanoparticles show reduced toxicity	NANO TODAY																														1748-0132					APR	2011	6	2
S	Roca, CP; Rallo, R; Fernandez, A; Giralt, F		Leszczynski, J; Puzyn, T		Roca, Carlos P.; Rallo, Robert; Fernandez, Alberto; Giralt, Francesc			Nanoinformatics for Safe-by-Design Engineered Nanomaterials	TOWARDS EFFICIENT DESIGNING OF SAFE NANOMATERIALS: INNOVATIVE MERGE OF COMPUTATIONAL APPROACHES AND EXPERIMENTAL TECHNIQUES	RSC Nanoscience and Nanotechnology																Rallo, Robert/F-4703-2010; Roca, Carlos P./F-3846-2014; Fernández-Sabater, Alberto/G-1214-2011	Rallo, Robert/0000-0003-3812-4458; Roca, Carlos P./0000-0003-0230-1926; Fernández-Sabater, Alberto/0000-0002-1241-1646												1757-7136	1757-7144	978-1-84973-547-6; 978-1-84973-453-0				2013	25
J	Semenzin, E; Giubilato, E; Badetti, E; Picone, M; Ghirardini, AV; Hristozov, D; Brunelli, A; Marcomini, A				Semenzin, Elena; Giubilato, Elisa; Badetti, Elena; Picone, Marco; Ghirardini, Annamaria Volpi; Hristozov, Danail; Brunelli, Andrea; Marcomini, Antonio			Guiding the development of sustainable nano-enabled products for the conservation of works of art: proposal for a framework implementing the Safe by Design concept	ENVIRONMENTAL SCIENCE AND POLLUTION RESEARCH												Nanotechnology provides innovative and promising solutions for the conservation of cultural heritage, but the development and application of new nano-enabled products pose concerns regarding their human health and environmental risks. To address these issues, we propose a sustainability framework implementing the Safe by Design concept to support product developers in the early steps of product d…					Picone, Marco/AAC-2040-2020	Picone, Marco/0000-0003-0957-7247; GIUBILATO, Elisa/0000-0001-6335-0735; Volpi Ghirardini, Annamaria/0000-0002-8834-2595												0944-1344	1614-7499				SEP	2019	26	25
J	Ivask, A; Juganson, K; Bondarenko, O; Visnapuu, M; Kasemets, K; Kahru, A				Ivask, Angela; Juganson, Katre; Bondarenko, Olesja; Visnapuu, Meeri; Kasemets, Kaja; Kahru, Anne			Safe-by-design and toxic-by design, two approaches for design of novel functional nanomaterials	TOXICOLOGY LETTERS					50th Congress of the European-Societies-of-Toxicology	SEP 07-10, 2014	Edinburgh, SCOTLAND	European Soc Toxicol, British Toxicol Soc, Soc Toxicol									Kahru, Anne/C-4927-2008; Bondarenko, Olesja/AAP-7679-2020; Visnapuu, Meeri/AAJ-4545-2021; Bondarenko, Olesja/AGE-4475-2022; Ivask, Angela/AAH-5777-2021; Kasemets, Kaja/B-9802-2016; Ivask, Angela/G-5180-2011	Kahru, Anne/0000-0002-4944-4900; Bondarenko, Olesja/0000-0001-8767-1365; Kasemets, Kaja/0000-0001-6413-3660; Ivask, Angela/0000-0003-3451-7211												0378-4274	1879-3169				SEP 10	2014	229			S
J	Jaffe, M; Allam, S				Jaffe, Michael; Allam, Sahitya			Safer fuels by integrating polymer theory into design	SCIENCE																														0036-8075	1095-9203				OCT 2	2015	350	6256
J	Kallhoff, A				Kallhoff, Angela			Safer by Design and Trump Rights of Citizens	NANOETHICS												The debate on safer by design has primarily been focused on strategies to render products safer during the design process. This article focuses on correlated basic legal rights of citizens. The reference to trump rights is helpful in highlighting two normative claims: Firstly, products that are safer by design are suitable instruments to protect the bodily integrity and health of potential users.…						Kallhoff, Angela/0000-0001-6154-1298												1871-4757	1871-4765				DEC	2017	11	3
J	Lin, SJ; Yu, TY; Yu, ZY; Hu, XL; Yin, DQ				Lin, Sijie; Yu, Tianyu; Yu, Zhenyang; Hu, Xialin; Yin, Daqiang			Nanomaterials Safer-by-Design: An Environmental Safety Perspective	ADVANCED MATERIALS												Designing safer nanomaterials and nanostructures has gained increasing attention in the field of nanoscience and technology in recent years. Based on the body of experimental evidence contributed by environmental health and safety studies, materials scientists now have a better grasp on the relationships between the nanomaterials' physicochemical characteristics and their hazard/safety profiles. …					Lin, Sijie/S-8428-2016	Lin, Sijie/0000-0002-6970-8221; Hu, Xialin/0000-0003-0897-0741												0935-9648	1521-4095				APR 25	2018	30	17
C	Schuster, F; Lomello, F			IOP	Schuster, F.; Lomello, F.			From Safe Nanomanufacturing to Nanosafe-by-Design processes	NANOSAFE 2012: INTERNATIONAL CONFERENCES ON SAFE PRODUCTION AND USE OF NANOMATERIALS	Journal of Physics Conference Series				3rd International Conference on Safe Production and Use of Nanomaterials (Nanosafe)	NOV 13-15, 2012	Minatec, Grenoble, FRANCE		Minatec			Industrial needs in terms of multifunctional components are increasing. Many sectors are concerned, from the integrated direct nanoparticles production to the emerging combinations which include the metal matrix composites (MMC), ductile ceramics and ceramic matrix composites, polymer matrix composites (PMC) for bulk application and advanced surface coatings in the fields of automotive, aerospace…						Lomello, Fernando/0000-0002-0315-8124												1742-6588	1742-6596					2013	429
J	Janicijevic, Z; Stankovic, A; Zegura, B; Veljovic, D; Djekic, L; Krajisnik, D; Filipic, M; Stevanovic, MM				Janicijevic, Zeljko; Stankovic, Ana; Zegura, Bojana; Veljovic, Dorde; Djekic, Ljiljana; Krajisnik, Danina; Filipic, Metka; Stevanovic, Magdalena M.			Safe-by-design gelatin-modified zinc oxide nanoparticles	JOURNAL OF NANOPARTICLE RESEARCH												We report an innovative low-cost wet precipitation synthesis method for gelatin-modified zinc oxide nanoparticles (GM ZnO NPs) at the interface between the gelatin hydrogel and aqueous electrolyte. Diffusion of ammonia through the hydrogel matrices with different gelatin contents induced precipitation of the product in contact with the surface of the aqueous solution of zinc ions. The obtained pr…					Zegura, Bojana/H-2346-2015; Zegura, Bojana/ABG-4472-2021; Stevanovic, Magdalena/A-6120-2011	Zegura, Bojana/0000-0002-5731-0785; Janicijevic, Zeljko/0000-0002-9494-9529; Stevanovic, Magdalena/0000-0002-3989-0237												1388-0764	1572-896X				SEP	2021	23	9
B	Winkler, DA		Gajewicz, A; Puzyn, T		Winkler, David A.			Issues for and Examples of Computational Design of Safe-by-Design Nanomaterials	COMPUTATIONAL NANOTOXICOLOGY: CHALLENGES AND PERSPECTIVES												The interactions of nanomaterials with biological systems are exceedingly complex and multifactorial. While a detailed understanding of the myriad of processes that occur when a nanoparticle enters the body that lead to a possible adverse effect is not possible, data-driven statistical and machine learning modeling methods (nano-QSAR models) can capture enough of the complexity to help make usefu…					Winkler, David A/A-3774-2008	Winkler, David A/0000-0002-7301-6076														978-1-000-68088-1; 978-981-4800-64-8				2019
J	Sánchez-Jiménez, A; Puelles, R; Perez-Fernandez, M; Barruetabena, L; Jacobsen, NR; Suarez-Merino, B; Micheletti, C; Manier, N; Salieri, B; Hischier, R; Tsekovska, R; Handzhiyski, Y; Bouillard, J; Oudart, Y; Galea, KS; Kelly, S; Shandilya, N; Goede, H; Gomez-Cordon, J; Jensen, KA; van Tongeren, M; Apostolova, MD; Llopis, IR				Jimenez, Araceli Sanchez; Puelles, Raquel; Perez-Fernandez, Marta; Barruetabena, Leire; Jacobsen, Nicklas Raun; Suarez-Merino, Blanca; Micheletti, Christian; Manier, Nicolas; Salieri, Beatrice; Hischier, Roland; Tsekovska, Rositsa; Handzhiyski, Yordan; Bouillard, Jacques; Oudart, Yohan; Galea, Karen S.; Kelly, Sean; Shandilya, Neeraj; Goede, Henk; Gomez-Cordon, Julio; Jensen, Keld Alstrup; van To…			Safe(r) by design guidelines for the nanotechnology industry	NANOIMPACT												Expectations for safer and sustainable chemicals and products are growing to comply with the United Nations and European strategies for sustainability. The application of Safe(r) by Design (SbD) in nanotechnology implies an iterative process where functionality, human health and safety, environmental and economic impact and cost are assessed and balanced as early as possible in the innovation pro…						Tsekovska, Rositsa/0000-0001-5431-5743												2452-0748					JAN	2022	25
J	Sánchez-Jiménez, A; Puelles, R; Perez-Fernandez, M; Gomez-Fernandez, P; Barruetabena, L; Jacobsen, NR; Suarez-Merino, B; Micheletti, C; Manier, N; Trouiller, B; Navas, JM; Kalman, J; Salieri, B; Hischier, R; Handzhiyski, Y; Apostolova, MD; Hadrup, N; Bouillard, J; Oudart, Y; Merino, C; Garcia, E; Liguori, B; Sabella, S; Rose, J; Masion, A; Galea, KS; Kelly, S; Stepankova, S; Mouneyrac, C; Barrick…				Jimenez, Araceli Sanchez; Puelles, Raquel; Perez-Fernandez, Marta; Gomez-Fernandez, Paloma; Barruetabena, Leire; Jacobsen, Nicklas Raun; Suarez-Merino, Blanca; Micheletti, Christian; Manier, Nicolas; Trouiller, Benedicte; Maria Navas, Jose; Kalman, Judit; Salieri, Beatrice; Hischier, Roland; Handzhiyski, Yordan; Apostolova, Margarita D.; Hadrup, Niels; Bouillard, Jacques; Oudart, Yohan; Merino, C…			Safe(r) by design implementation in the nanotechnology industry	NANOIMPACT												The implementation of Safe(r) by Design (SbD) in industrial innovations requires an integrated approach where the human, environmental and economic impact of the SbD measures is evaluated across and throughout the nanomaterial (NM) life cycle. SbD was implemented in six industrial companies where SbD measures were applied to NMs, nano-enabled products (NEPs) and NM/NEP manufacturing processes. Th…					Apostolova, Margarita/AAF-2940-2019; Trouiller, Bénédicte/AFY-4095-2022; ROSE, Jerome/J-5063-2017; Kalman, Judit/AAI-7628-2020; Navas, José María/I-9328-2012; Salieri, Beatrice/ABA-9258-2020; Hischier, Roland/J-3996-2019; Masion, Armand/AAT-1342-2021; brock, gareth/AAJ-7874-2021; BRESSOT, Christophe/Q-8769-2018	Apostolova, Margarita/0000-0001-7188-506X; Trouiller, Bénédicte/0000-0003-4367-2870; ROSE, Jerome/0000-0003-3071-8147; Kalman, Judit/0000-0002-3610-1968; Navas, José María/0000-0002-7644-8499; Salieri, Beatrice/0000-0002-8338-6206; Hischier, Roland/0000-0002-1084-7665; BRESSOT, Christophe/0000-0002-3649-0596; Kelly, Sean/0000-0002-2054-5441; Shandilya, Neeraj/0000-0003-3328-8517; Gomez, Julio/000…												2452-0748					OCT	2020	20
J	Thimbleby, H; Lewis, A; Williams, J				Thimbleby, Harold; Lewis, Alexis; Williams, John			Making healthcare safer by understanding, designing and buying better IT	CLINICAL MEDICINE												When nobody or nothing notices an error, it may turn into patient harm. We show that medical devices ignore many errors, and therefore do not adequately support patient safety. In addition to causing preventable patient harm, errors are often reported ignoring potential flaws in medical device design, and front line staff may therefore be inappropriately blamed. We present some suggestions to imp…																		1470-2118	1473-4893				JUN	2015	15	3
J	Musino, D; Rosset, A; Lelong, C; Luche, S; Berge, V; Brochard, G; Plumail, M; Trouiller, B; Auger, A; Guiot, A; Patouillard, J; Desrousseaux, S; Artous, S; Rabilloud, T; Boutry, D; Capron, I				Musino, Dafne; Rosset, Aurelie; Lelong, Cecile; Luche, Sylvie; Berge, Virginie; Brochard, Gregory; Plumail, Manon; Trouiller, Benedicte; Auger, Aurelien; Guiot, Arnaud; Patouillard, Julien; Desrousseaux, Stephanie; Artous, Sebastien; Rabilloud, Thierry; Boutry, Delphine; Capron, Isabelle			CNC/AgNP hybrids as safer-by-design biocides in paints	ENVIRONMENTAL SCIENCE-NANO												In this work, biocidal paints are designed by a safer-by-design approach where an efficient antibacterial activity is provided by nanohybrids consisting of silver nanoparticles (AgNPs) nucleated on a bio-based substrate (cellulose nanocrystals, CNCs), to be included in an amount as low as possible and dispersed in an aqueous suspension. Three CNC/AgNP hybrids varying in CNC surface modifications …					Trouiller, Bénédicte/AFY-4095-2022	Trouiller, Bénédicte/0000-0003-4367-2870; ARTOUS, Sebastien/0000-0001-7581-2714; Rosset, Aurelie/0000-0002-2451-7157												2051-8153	2051-8161				DEC 9	2021	8	12
C	Nau, K; Muller, T; Sampaio, DJBS; Scholz, SG		Oberhauser, R; Park, J; Scholz, SG; Rosenthal, P; Kascak, LR		Nau, Katja; Mueller, Tobias; Sampaio, Daniel J. B. S.; Scholz, Steffen G.			Nano Inks for Additive Manufacturing - A Safe-by-Design-Approach	ACHI 2017: THE TENTH INTERNATIONAL CONFERENCE ON ADVANCES IN COMPUTER-HUMAN INTERACTIONS					10th International Conference on Advances in Computer-Human Interactions (ACHI)	MAR 19-23, 2017	Nice, FRANCE	IARIA				Additive manufacturing (AM) enables a new manufacturing paradigm, such as the rapid, distributive manufacture of complex 3D objects. Nanoparticles are in particular suitable for ink formulation of novel PolyJet inks to obtain functionalities embedded in the AM process. However, the impact and interaction of nanomaterials on environment and human health is widely discussed today. This paper deals …																				978-1-61208-538-8				2017
C	Akdas, T; Reiss, P			IOP	Akdas, Tugce; Reiss, Peter			Safer-by-design synthesis of quantum dots in flow reactors	6TH NANOSAFE INTERNATIONAL CONFERENCE	Journal of Physics Conference Series				6th Nanosafe International Conference on Health and Safety Issues Related to Nanomaterials for a Socially Responsible Approach (NANOSAFE)	NOV 05-09, 2018	Grenoble, FRANCE					After decades of research and commercialization efforts, colloidal semiconductor nanocrystals (quantum dots, QDs) are now on the verge of widespread application. Given the high demands of industrial production processes regarding process safety, cost efficiency and reproducibility of high quality products with high yield, continuous processes in flow reactors offer several advantages over the sca…					Reiss, Peter/C-2604-2009													1742-6588	1742-6596					2019	1323
J	Lopes, L; Martins, F				Lopes, Luis; Martins, Francisco			A safe-by-design programming language for wireless sensor networks	JOURNAL OF SYSTEMS ARCHITECTURE												Wireless sensor networks are notoriously difficult to program and debug. This fact not only stems from the nature of the hardware, but also from the current approaches for developing programming languages and runtime systems for these platforms. In particular, current systems do not place enough stress on providing formal descriptions of the language and its runtime system, and on proving static …					Francisco, Martins C/M-1767-2015; Lopes, Luis/H-2044-2014	Francisco, Martins C/0000-0002-2379-7257; Lopes, Luis/0000-0001-8273-1357												1383-7621	1873-6165				FEB	2016	63
C	Zaini, D; Pasha, M; Kaura, S		Bustam, MA; Man, Z; Keong, LK; Hassankiadeh, AA; Fong, YY; Ayoub, M; Moniruzzaman, M; Mandal, P		Zaini, Dzulkarnain; Pasha, Mohsin; Kaura, Sunitaraj			Inherently Safe Heat Exchanger Network Design by Consequence Based Analysis	PROCEEDING OF 4TH INTERNATIONAL CONFERENCE ON PROCESS ENGINEERING AND ADVANCED MATERIALS (ICPEAM 2016)	Procedia Engineering				4th International Conference on Process Engineering and Advanced Materials (ICPEAM)	AUG 15-17, 2016	Kuala Lumpur, MALAYSIA	Univ Teknologi PETRONAS, Chemical Engn Dept				The failure of heat exchangers is an acute problem being experienced by chemical process industries. The loss of containment from this failure can cause enormous destruction and monetary loss in industries. The failure frequency of the heat exchanger network can be substantially improved through the inherently safer design. Moreover, integration between process design stages with risk and consequ…																		1877-7058						2016	148
J	Park, DH; Gautam, M; Park, SJ; Hwang, J; Yong, CS; Kim, JO; Byeon, JH				Park, Dae Hoon; Gautam, Milan; Park, Sung Jae; Hwang, Jungho; Yong, Chul Soon; Kim, Jong Oh; Byeon, Jeong Hoon			Plug-and-play safe-by-design production of metal-doped tellurium nanoparticles with safer antimicrobial activities	ENVIRONMENTAL SCIENCE-NANO												Safe-by-design principles, such as optimum balance of material function and safety, have received much recent attention. On-demand production is also receiving great interest in the realization of nanotechnologies that meet unpredictable demands of reconfiguration and modification to maximize the efficacy of materials processing. Antimicrobial nanomaterials are representative subjects of these ap…					Gautam, Milan/AAC-9295-2020; Park, Dae Hoon/L-5693-2018	Gautam, Milan/0000-0002-3817-620X; Park, Dae Hoon/0000-0002-5886-3330												2051-8153	2051-8161				JUL 1	2019	6	7
J	Kraegeloh, A; Suarez-Merino, B; Sluijters, T; Micheletti, C				Kraegeloh, Annette; Suarez-Merino, Blanca; Sluijters, Teun; Micheletti, Christian			Implementation of Safe-by-Design for Nanomaterial Development and Safe Innovation: Why We Need a Comprehensive Approach	NANOMATERIALS												Manufactured nanomaterials (MNMs) are regarded as key components of innovations in various fields with high potential impact (e.g., energy generation and storage, electronics, photonics, diagnostics, theranostics, or drug delivery agents). Widespread use of MNMs raises concerns about their safety for humans and the environment, possibly limiting the impact of the nanotechnology-based innovation. …																		2079-4991					APR	2018	8	4
J	van der Berg, JP; Kleter, GA; Battaglia, E; Bouwman, LMS; Kok, EJ				van der Berg, Jan Pieter; Kleter, Gijs A.; Battaglia, Evy; Bouwman, Lianne M. S.; Kok, Esther J.			Application of the Safe-by-Design Concept in Crop Breeding Innovation	INTERNATIONAL JOURNAL OF ENVIRONMENTAL RESEARCH AND PUBLIC HEALTH												The present paper proposes the application of the safe-by-design concept to crop breeding innovation with the aim to accommodate safety considerations for new agricultural food and feed products. Safe-by-design can be implemented in all stages of the innovation cycle of agricultural products, from the early stages of research and development towards the post-market stage. Our proposed application…						van der Berg, Jan Pieter/0000-0003-0089-2240													1660-4601				SEP	2020	17	17
J	Vaz, MB; Vitorino, C; Sousa, JJS				Vaz, Mafalda B.; Vitorino, Carla; Sousa, Joao J. S.			Safe-by-design development of a topical patch for drug delivery	BRAZILIAN JOURNAL OF PHARMACEUTICAL SCIENCES												Few topical products have been developed specifically to treat acute and chronic arthritis and inflammation, using non-steroidal anti-inflammatory drugs (NSAIDs). The lack of dosing accuracy commonly found in locally applied semisolid products for cutaneous use is a critical issue that leads to treatment failure. The aim of the present work is to develop a differentiated and innovative topical pa…						Vitorino, Carla/0000-0003-3424-548X												1984-8250	2175-9790					2020	56
J	Schmutz, M; Borges, O; Jesus, S; Borchard, G; Perale, G; Zinn, M; Sips, AAJAM; Soeteman-Hernandez, LG; Wick, P; Som, C				Schmutz, Melanie; Borges, Olga; Jesus, Sandra; Borchard, Gerrit; Perale, Giuseppe; Zinn, Manfred; Sips, Adrienne A. J. A. M.; Soeteman-Hernandez, Lya G.; Wick, Peter; Som, Claudia			A Methodological Safe-by-Design Approach for the Development of Nanomedicines	FRONTIERS IN BIOENGINEERING AND BIOTECHNOLOGY												Safe-by-Design (SbD) concepts foresee the risk identification and reduction as well as uncertainties regarding human health and environmental safety in early stages of product development. The EU's NANoREG project and further on the H2020 ProSafe initiative, NanoReg2, and CALIBRATE projects have developed a general SbD approach for nanotechnologies (e.g., paints, textiles, etc.). Based on it, the…					Borges, Olga/AAX-6591-2020	Soeteman-Hernandez, Lya G./0000-0003-3529-3694												2296-4185					APR 2	2020	8
J	Marchioni, M; Veronesi, G; Worms, I; Ling, WL; Gallon, T; Leonard, D; Gateau, C; Chevallet, M; Jouneau, PH; Carlini, L; Battocchio, C; Delangle, P; Michaud-Soret, I; Deniaud, A				Marchioni, Marianne; Veronesi, Giulia; Worms, Isabelle; Ling, Wai Li; Gallon, Thomas; Leonard, Didier; Gateau, Christelle; Chevallet, Mireille; Jouneau, Pierre-Henri; Carlini, Laura; Battocchio, Chiara; Delangle, Pascale; Michaud-Soret, Isabelle; Deniaud, Aurelien			Safer-by-design biocides made of tri-thiol bridged silver nanoparticle assemblies	NANOSCALE HORIZONS												Silver nanoparticles (AgNPs) are efficient biocides increasingly used in consumer products and medical devices. Their activity is due to their capacity to release bioavailable Ag(i) ions making them long-lasting biocides but AgNPs themselves are usually easily released from the product. Besides, AgNPs are highly sensitive to various chemical environments that triggers their transformation, decrea…					Ling, Wai Li W/F-9823-2012	Ling, Wai Li W/0000-0002-4264-5750; Veronesi, Giulia/0000-0001-9228-6082; Michaud-Soret, Isabelle/0000-0002-8936-4964; Carlini, Laura/0000-0001-9448-017X; Worms, Isabelle A. M./0000-0002-7498-0078; marchioni, marianne/0000-0002-7893-8723												2055-6756	2055-6764				MAR 1	2020	5	3
J	Vukosavljev, M; Kroeze, Z; Schoellig, AP; Broucke, ME				Vukosavljev, Marijan; Kroeze, Zachary; Schoellig, Angela P.; Broucke, Mireille E.			A Modular Framework for Motion Planning Using Safe-by-Design Motion Primitives	IEEE TRANSACTIONS ON ROBOTICS												In this paper, we present a modular framework for solving a motion planning problem among a group of robots. The proposed framework utilizes a finite set of low-level motion primitives to generate motions in a gridded workspace. The constraints on allowable sequences of motion primitives are formalized through a maneuver automaton. At the high level, a control policy determines which motion primi…																		1552-3098	1941-0468				OCT	2019	35	5
C	Gradwell, B			IEEE	Gradwell, Brad			ARC FLASH\BLAST, SAFE BY DESIGN A SAFETY INTEGRITY LEVEL APPROACH (SIL)	2017 IEEE IAS ELECTRICAL SAFETY WORKSHOP (ESW)	IEEE IAS Electrical Safety Workshop				IEEE-Industry-Applications-Society (IAS) Electrical Safety Workshop (ESW)	JAN 28-FEB 03, 2017	Reno, NV	IEEE Ind Applicat Soc				This paper illustrates the application of a Safe by Design approach developed by the process industries to determine the effectiveness of arc flash\blast risk control techniques using functional safety techniques used to determine the integrity of emergency shutdown systems. It is proposed that with the adoption of risk analysis practices detailed in NFPA70E-2015 Informative Annex F Risk Assessme…																		2326-3288		978-1-5090-5099-4				2017
C	Micheletti, C; Roman, M; Tedesco, E; Olivato, I; Benetti, F			IOP	Micheletti, C.; Roman, M.; Tedesco, E.; Olivato, I.; Benetti, F.			Implementation of the NANoREG Safe-by-Design approach for different nanomaterial applications	5TH NANOSAFE INTERNATIONAL CONFERENCE ON HEALTH AND SAFETY ISSUES RELATED TO NANOMATERIALS FOR A SOCIALLY RESPONSIBLE APPROACH (NANOSAFE 2016)	Journal of Physics Conference Series				5th Nanosafe International Conference on Health and Safety Issues Related to Nanomaterials for a Socially Responsible Approach (NANOSAFE)	NOV 07-10, 2016	Grenoble, FRANCE					The Safe-by-Design (SbD) concept is already in use in different industrial sectors as an integral part of the innovation process management. However, the adopted approach is often limited to design solutions aiming at hazard reduction. Safety is not always considered during the innovation process, mainly due to the lack of knowledge (e.g. in small and medium companies, SMEs) and the lack of dialo…					Roman, Marco/ABC-7022-2020	Roman, Marco/0000-0003-1289-8236; Benetti, Federico/0000-0001-6491-4715												1742-6588	1742-6596					2017	838
J	Williams, S				Williams, Steve			Briefing: Network Rail Safe by Design: Buildings and Civils Working Group, UK	PROCEEDINGS OF THE INSTITUTION OF CIVIL ENGINEERS-FORENSIC ENGINEERING												Irrespective of what is designed, safety is an integral part of the design process. Practitioners need to understand what influences safe design, look at hazards and then adapt their processes, and more importantly their behaviours, to make it instinctive. Design must consider safety over the whole project life cycle, from inception to development, implementation, commissioning, operation and mai…																		2043-9903	2043-9911				FEB	2018	171	1
J	Colaco, M; Marques, AP; Jesus, S; Duarte, A; Borges, O				Colaco, Mariana; Marques, Ana P.; Jesus, Sandra; Duarte, Alana; Borges, Olga			Safe-by-Design of Glucan Nanoparticles: Size Matters When Assessing the Immunotoxicity	CHEMICAL RESEARCH IN TOXICOLOGY												Glucan (from Alcaligenes faecalis) is a polymer composed of beta-1,3-linked glucose residues, and it has been addressed in different medical fields, namely in nanotechnology, as a vaccine or a drug delivery system. However, due to their small size, nanomaterials may present new risks and uncertainties. Thus, this work aims to describe the production of glucan nanoparticles (NPs) with two differen…					Borges, Olga/AAX-6591-2020	Colaco, Mariana/0000-0002-5147-7226; Marques, Ana Patricia/0000-0003-0551-6375; Borges, Olga/0000-0002-2215-5121												0893-228X	1520-5010				APR 20	2020	33	4
J	Aldakov, D; Reiss, P				Aldakov, Dmitry; Reiss, Peter			Safer-by-Design Fluorescent Nanocrystals: Metal Halide Perovskites vs Semiconductor Quantum Dots	JOURNAL OF PHYSICAL CHEMISTRY C												Despite the young age of the research field, substantial progress has been made in the study of metal halide perovskite nanocrystals (HPNCs). Just as their thin-film counterparts are used for light absorption in solar cells, they are on the way to revolutionizing research on novel chromophores for light emission applications. Exciting physics arising from their peculiar structural, electronic, an…					Reiss, Peter/C-2604-2009													1932-7447					MAY 23	2019	123	20
C	Jeliazkova, N; Doganis, P; Fadeel, B; Grafstrom, R; Hastings, J; Jeliazkov, V; Kohonen, P; Munteanu, CR; Sarimveis, H; Smeets, B; Tsiliki, G; Vorgrimmler, D; Willighagen, E		Zheng, H; Hu, X; Berrar, D; Wang, Y; Dubitzky, W; Hao, JK; Cho, KH; Gilbert, D		Jeliazkova, Nina; Doganis, Philip; Fadeel, Bengt; Grafstrom, Roland; Hastings, Janna; Jeliazkov, Vedrin; Kohonen, Pekka; Munteanu, Cristian R.; Sarimveis, Haralambos; Smeets, Bart; Tsiliki, Georgia; Vorgrimmler, David; Willighagen, Egon			The first eNanoMapper prototype: a substance database to support safe-by-design	2014 IEEE INTERNATIONAL CONFERENCE ON BIOINFORMATICS AND BIOMEDICINE (BIBM)	IEEE International Conference on Bioinformatics and Biomedicine-BIBM				IEEE International Conference on Bioinformatics and Biomedicine (IEEE BIBM)	NOV 02-05, 2014	Univ Ulster, Belfast, NORTH IRELAND	IEEE, Natl Sci Fdn, Nsilico, Comp Sci Res Inst, BioBusiness, IEEE Comp Soc, Engn Res Inst, Biomed Sci Res Inst	Univ Ulster			The EU-funded eNanoMapper project proposes a computational infrastructure for toxicological data management of engineered nanomaterials (ENMs) based on open standards, ontologies and an interoperable design to enable a more effective, integrated approach to European research in nanotechnology. eNanoMapper's goal is to support the collaborative safety assessment for ENMs by creating a modular, ext…					Grafström, Roland C/N-7217-2016; Jeliazkova, Nina/P-5381-2019; Munteanu, Cristian-Robert/G-1714-2011; Kohonen, Pekka/F-9596-2011; Sarimveis, Haralambos/ABE-9828-2020; Willighagen, Egon/C-6136-2008	Jeliazkova, Nina/0000-0002-4322-6179; Munteanu, Cristian-Robert/0000-0002-5628-2268; Kohonen, Pekka/0000-0002-7845-3611; Willighagen, Egon/0000-0001-7542-0286												2156-1125		978-1-4799-5669-2				2014
J	Bottero, JY; Rose, J; de Garidel, C; Masion, A; Deutsch, T; Brochard, G; Carriere, M; Gontard, N; Wortham, H; Rabilloud, T; Salles, B; Dubosson, M; Cathala, B; Boutry, D; Ereskovsky, A; Auplat, C; Charlet, L; Heulin, T; Frejafon, E; Lanone, S				Bottero, J. Y.; Rose, J.; de Garidel, C.; Masion, A.; Deutsch, Th.; Brochard, G.; Carriere, M.; Gontard, N.; Wortham, H.; Rabilloud, T.; Salles, B.; Dubosson, M.; Cathala, B.; Boutry, D.; Ereskovsky, A.; Auplat, C.; Charlet, L.; Heulin, T.; Frejafon, E.; Lanone, S.			SERENADE: safer and ecodesign research and education applied to nanomaterial development, the new generation of materials safer by design	ENVIRONMENTAL SCIENCE-NANO												SERENADE is a French project which aims to develop and apply the safer by design process to create safer nano-products. It achieves this goal by combining knowledge and scientific approaches from a range of disciplines towards this common goal. This tutorial review presents the conceptual approach to Safer by Design and provides several examples of case studies primarily for TiO2 (anatase) presen…					, HEULIN/C-1689-2010; Deutsch, Thierry/A-6077-2009; FREJAFON, Emeric/A-2407-2009; Charlet, Laurent/ABH-2520-2020; FREJAFON, Emeric/AAE-7190-2022; Ereskovsky, Alexander/W-1504-2019; Masion, Armand/AAT-1342-2021; Lanone, Sophie/I-4042-2016; GONTARD, Nathalie Georgette Jeanne/AAY-6124-2021; ROSE, Jerome/J-5063-2017; Ereskovsky, Alexander/B-3136-2013	Deutsch, Thierry/0000-0001-7503-3390; FREJAFON, Emeric/0000-0002-2949-1726; Charlet, Laurent/0000-0003-3669-7316; Lanone, Sophie/0000-0003-2509-8799; GONTARD, Nathalie Georgette Jeanne/0000-0002-8544-3139; ROSE, Jerome/0000-0003-3071-8147; Ereskovsky, Alexander/0000-0003-1079-7204; Cathala, Bernard/0000-0002-3844-872X												2051-8153	2051-8161				MAR 1	2017	4	3
J	Bouchaut, B; Asveld, L; Hanefeld, U; Vlierboom, A				Bouchaut, Britte; Asveld, Lotte; Hanefeld, Ulf; Vlierboom, Alexander			Value Conflicts in Designing for Safety: Distinguishing Applications of Safe-by-Design and the Inherent Safety Principles	INTERNATIONAL JOURNAL OF ENVIRONMENTAL RESEARCH AND PUBLIC HEALTH												Although both the Inherent Safety Principles (ISPs) and the Safe-by-Design (SbD) approach revolve around the central value of safety, they have a slightly different focus in terms of developing add-on features or considering initial design choices. This paper examines the differences between these approaches and analyses which approach is more suitable for a specific type of research-fundamental …						Asveld, Lotte/0000-0002-2524-7814; Hanefeld, Ulf/0000-0002-4102-6165; Bouchaut, Britte/0000-0002-1375-4675													1660-4601				FEB	2021	18	4
J	Gulumian, M; Andraos, C; Afantitis, A; Puzyn, T; Coville, NJ				Gulumian, Mary; Andraos, Charlene; Afantitis, Antreas; Puzyn, Tomasz; Coville, Neil J.			Importance of Surface Topography in Both Biological Activity and Catalysis of Nanomaterials: Can Catalysis by Design Guide Safe by Design?	INTERNATIONAL JOURNAL OF MOLECULAR SCIENCES												It is acknowledged that the physicochemical properties of nanomaterials (NMs) have an impact on their toxicity and, eventually, their pathogenicity. These properties may include the NMs' surface chemical composition, size, shape, surface charge, surface area, and surface coating with ligands (which can carry different functional groups as well as proteins). Nanotopography, defined as the specific…					Afantitis, Antreas/A-9637-2010	Afantitis, Antreas/0000-0002-0977-8180; Gulumian, Mary/0000-0002-4495-8363; Coville, Neil/0000-0001-5370-1386; Puzyn, Tomasz/0000-0003-0449-8339; Andraos, Charlene/0000-0002-3049-0392													1422-0067				AUG	2021	22	15
J	Soeteman-Hernandez, LG; Blab, GA; Carattino, A; Dekker, F; Dekkers, S; van der Linden, M; van Silfhout, A; Noorlander, CW				Soeteman-Hernandez, Lya G.; Blab, Gerhard A.; Carattino, Aquiles; Dekker, Frans; Dekkers, Susan; van der Linden, Marte; van Silfhout, Alex; Noorlander, Cornelle W.			Challenges of implementing nano-specific safety and safe-by-design principles in academia	NANOIMPACT												Safe-by-design is an essential component for creating awareness of the potential novel risks associated with the introduction of sophisticated nanomaterials (NMs) with novel properties. SbD is also a useful tool for meeting EU policy ambitions such as the European Green Deal which includes circular economy and moving towards a zero pollution (pollution-free) environment. Unidentified risks are a …						Soeteman-Hernandez, Lya G./0000-0003-3529-3694; Dekker, Frans/0000-0002-8701-7360												2452-0748					JUL	2020	19
J	Sotiriou, GA; Watson, C; Murdaugh, KM; Darrah, TH; Pyrgiotakis, G; Elder, A; Brain, JD; Demokritou, P				Sotiriou, Georgios A.; Watson, Christa; Murdaugh, Kimberly M.; Darrah, Thomas H.; Pyrgiotakis, Georgios; Elder, Alison; Brain, Joseph D.; Demokritou, Philip			Engineering safer-by-design silica-coated ZnO nanorods with reduced DNA damage potential	ENVIRONMENTAL SCIENCE-NANO												Zinc oxide (ZnO) nanoparticles absorb UV light efficiently while remaining transparent in the visible light spectrum rendering them attractive in cosmetics and polymer films. Their broad use, however, raises concerns regarding potential environmental health risks and it has been shown that ZnO nanoparticles can induce significant DNA damage and cytotoxicity. Even though research on ZnO nanopartic…					Darrah, Tom H/I-2253-2016; Elder, Alison/AAR-3645-2021; Sotiriou, Georgios A./B-7633-2013	Elder, Alison/0000-0003-4034-3641; Sotiriou, Georgios A./0000-0001-5040-620X; Murdaugh, Kimberly/0000-0002-4299-6761												2051-8153	2051-8161				APR	2014	1	2
J	Gulumian, M; Cassee, FR				Gulumian, Mary; Cassee, Flemming R.			Safe by design (SbD) and nanotechnology: a much-discussed topic with a prudence?	PARTICLE AND FIBRE TOXICOLOGY												Safe-by-Design (SbD) has been put forward as a concept to assure that only safe nanomaterials will reach the market and that safety aspects have already been considered in a very early stage of the innovation process. In practice, several laboratory test have been proposed to screen newly developed nanomaterials and nano-enabled products to assess their hazardous nature. These tests need to have …																		1743-8977					AUG 23	2021	18	1
C	Verevkin, N; Lavrentyev, E; Chernyaev, I; Gurin, D		Brannolte, U; Pribyl, P; Silyanov, V		Verevkin, Nikolay; Lavrentyev, Evgeniy; Chernyaev, Igor; Gurin, Dmitriy			Method of Providing Safe Technical Condition of Vehicles by Technological Design of Enterprises	12TH INTERNATIONAL CONFERENCE - ORGANIZATION AND TRAFFIC SAFETY MANAGEMENT IN LARGE CITIES SPBOTSIC-2016	Transportation Research Procedia				12th International Conference on Road Organization and Safety in Big Cities	SEP 28-30, 2016	St Petersburg, RUSSIA					The problem of minimization of impact of vehicles' technical condition (V) and technological design of the production base for motor transport enterprises (MTEs) on the road traffic accident rate is investigated in the article. It is shown that the deterministic cycle method, used in practice, possesses low efficiency for small MTEs as well as for service stations maintaining their rolling stock.…					Chernyaev, Igor/ABA-2213-2021	Chernyaev, Igor/0000-0002-3862-4383												2352-1465						2017	20
J	Janko, C; Zaloga, J; Pottler, M; Durr, S; Eberbeck, D; Tietze, R; Lyer, S; Alexiou, C				Janko, Christina; Zaloga, Jan; Poettler, Marina; Duerr, Stephan; Eberbeck, Dietmar; Tietze, Rainer; Lyer, Stefan; Alexiou, Christoph			Strategies to optimize the biocompatibility of iron oxide nanoparticles - SPIONs safe by design	JOURNAL OF MAGNETISM AND MAGNETIC MATERIALS					14th International Conference on Magnetic Fluids (ICMF)	JUL 04-08, 2016	Ekaterinburg, RUSSIA					Various nanoparticle systems have been developed for medical applications in recent years. For constant improvement of efficacy and safety of nanoparticles, a close interdisciplinary interplay between synthesis, physicochemical characterizations and toxicological investigations is urgently needed. Based on combined toxicological data, we follow a safe-by design strategy for our superparamagnetic …						Janko, Christina/0000-0001-5705-6329												0304-8853	1873-4766				JUN 1	2017	431
J	Damasco, JA; Ravi, S; Perez, JD; Hagaman, DE; Melancon, MP				Damasco, Jossana A.; Ravi, Saisree; Perez, Joy D.; Hagaman, Daniel E.; Melancon, Marites P.			Understanding Nanoparticle Toxicity to Direct a Safe-by-Design Approach in Cancer Nanomedicine	NANOMATERIALS												Nanomedicine is a rapidly growing field that uses nanomaterials for the diagnosis, treatment and prevention of various diseases, including cancer. Various biocompatible nanoplatforms with diversified capabilities for tumor targeting, imaging, and therapy have materialized to yield individualized therapy. However, due to their unique properties brought about by their small size, safety concerns ha…						Damasco, Jossana/0000-0003-1164-3979; Melancon, Marites/0000-0002-7447-0705													2079-4991				NOV	2020	10	11
J	Burgum, MJ; Vogel, U; Clift, MJD; Doak, SH				Burgum, M. J.; Vogel, U.; Clift, M. J. D.; Doak, S. H.			Nanofibre inhalation toxicology: providing the foundations for safe-by-design in-silico models	TOXICOLOGY LETTERS					56th Congress of the European-Societies-of-Toxicology (EUROTOX) - Toxicology of the Next Generation	SEP 27-OCT 01, 2021	ELECTR NETWORK	European Soc Toxicol																						0378-4274	1879-3169				SEP	2021	350			S
J	van Gelder, P; Klaassen, P; Taebi, B; Walhout, B; van Ommen, R; van de Poel, I; Robaey, Z; Asveld, L; Balkenende, R; Hollmann, F; van Kampen, EJ; Khakzad, N; Krebbers, R; de Lange, J; Pieters, W; Terwel, K; Visser, E; van der Werff, T; Jung, D				van Gelder, Pieter; Klaassen, Pim; Taebi, Behnam; Walhout, Bart; van Ommen, Ruud; van de Poel, Ibo; Robaey, Zoe; Asveld, Lotte; Balkenende, Ruud; Hollmann, Frank; van Kampen, Erik Jan; Khakzad, Nima; Krebbers, Robbert; de Lange, Jos; Pieters, Wolter; Terwel, Karel; Visser, Eelco; van der Werff, Tiny; Jung, Dick			Safe-by-Design in Engineering: An Overview and Comparative Analysis of Engineering Disciplines	INTERNATIONAL JOURNAL OF ENVIRONMENTAL RESEARCH AND PUBLIC HEALTH												In this paper, we provide an overview of how Safe-by-Design is conceived and applied in practice in a large number of engineering disciplines. We discuss the differences, commonalities, and possibilities for mutual learning found in those practices and identify several ways of putting those disciplinary outlooks in perspective. The considered engineering disciplines in the order of historically g…					; van Gelder, Pieter/D-5834-2014; van Ommen, J. Ruud/A-4119-2009	Khakzad Rostami, Nima/0000-0002-3899-6830; van Kampen, Erik-Jan/0000-0002-5593-4471; Asveld, Lotte/0000-0002-2524-7814; van Gelder, Pieter/0000-0002-0001-0351; Klaassen, Pim/0000-0003-0029-6393; /0000-0002-9553-5651; Taebi, Behnam/0000-0002-2244-2083; van Ommen, J. Ruud/0000-0001-7884-0323													1660-4601				JUN	2021	18	12
J	Rosset, A; Bartolomei, V; Laisney, J; Shandilya, N; Voisin, H; Morin, J; Michaud-Soret, I; Capron, I; Wortham, H; Brochard, G; Berge, V; Carriere, M; Dussert, F; Le Bihan, O; Dutouquet, C; Benayad, A; Truffier-Boutry, D; Clavaguera, S; Artous, S				Rosset, A.; Bartolomei, V.; Laisney, J.; Shandilya, N.; Voisin, H.; Morin, J.; Michaud-Soret, I.; Capron, I.; Wortham, H.; Brochard, G.; Berge, V.; Carriere, M.; Dussert, F.; Le Bihan, O.; Dutouquet, C.; Benayad, A.; Truffier-Boutry, D.; Clavaguera, S.; Artous, S.			Towards the development of safer by design TiO2-based photocatalytic paint: impacts and performances	ENVIRONMENTAL SCIENCE-NANO												Addition of titanium dioxide (TiO2) (nano)particles into photocatalytic paints represents a promising alternative aiming to mineralize gaseous pollutants, such as volatile organic compounds (VOCs) into innocuous species (H2O and CO2). Despite important industrial and economic benefits, some concerns were raised regarding the risks associated with nano-objects and their human and environmental imp…					LE BIHAN, Olivier/L-2616-2016	LE BIHAN, Olivier/0000-0002-4775-960X; Rosset, Aurelie/0000-0002-2451-7157; Michaud-Soret, Isabelle/0000-0002-8936-4964; ARTOUS, Sebastien/0000-0001-7581-2714												2051-8153	2051-8161				MAR 1	2021	8	3
J	Marques, C; Som, C; Schmutz, M; Borges, O; Borchard, G				Marques, Cintia; Som, Claudia; Schmutz, Melanie; Borges, Olga; Borchard, Gerrit			How the Lack of Chitosan Characterization Precludes Implementation of the Safe-by-Design Concept	FRONTIERS IN BIOENGINEERING AND BIOTECHNOLOGY												Efficacy and safety of nanomedicines based on polymeric (bio)materials will benefit from a rational implementation of a Safe-by-Design (SbD) approach throughout their development. In order to achieve this goal, however, a standardization of preparation and characterization methods and their accurate reporting is needed. Focusing on the example of chitosan, a biopolymer derived from chitin and fre…					Borges, Olga/AAX-6591-2020													2296-4185					MAR 10	2020	8
J	Mendes, LA; Amorim, MJB; Scott-Fordsmand, JJ				Mendes, L. A.; Amorim, M. J. B.; Scott-Fordsmand, J. J.			Assessing the toxicity of safer by design CuO surface-modifications using terrestrial multispecies assays	SCIENCE OF THE TOTAL ENVIRONMENT												Safer by design (SBD) modifications of nanomaterials (NMs) have been pursued, aiming to maintain functionality and yet reduce hazard and support sustainable nanotechnology. The present case study involves copper oxide nanomaterials (CuO NMs) used in paint that have been surface modified by a SBD approach to particles coated with citrate (CIT-), ascorbate (ASC(-)), polyethylenimine (PEI+), and pol…					Mendes, Luís André LG/D-7990-2014; Amorim, Mónica J.B./G-8590-2011; Scott-Fordsmand, Janeck/J-6019-2013	Mendes, Luís André LG/0000-0002-4573-8290; Amorim, Mónica J.B./0000-0001-8137-3295; Scott-Fordsmand, Janeck/0000-0002-2260-1224												0048-9697	1879-1026				AUG 15	2019	678
S	Brehm, M; Kafka, A; Bamler, M; Kuhne, R; Schuurmann, G; Sikk, L; Burk, J; Burk, P; Tamm, T; Tamm, K; Pokhrel, S; Madler, L; Kahru, A; Aruoja, V; Sihtmae, M; Scott-Fordsmand, J; Sorensen, PB; Escorihuela, L; Roca, CP; Fernandez, A; Giralt, F; Rallo, R		Tran, L; Banares, MA; Rallo, R		Brehm, Martin; Kafka, Alexander; Bamler, Markus; Kuehne, Ralph; Schueuermann, Gerrit; Sikk, Lauri; Burk, Jaanus; Burk, Peeter; Tamm, Tarmo; Taemm, Kaido; Pokhrel, Suman; Maedler, Lutz; Kahru, Anne; Aruoja, Villem; Sihtmaee, Mariliis; Scott-Fordsmand, Janeck; Sorensen, Peter B.; Escorihuela, Laura; Roca, Carlos P.; Fernandez, Alberto; Giralt, Francesc; Rallo, Robert			An Integrated Data-Driven Strategy for Safe-by-Design Nanoparticles: The FP7 MODERN Project	MODELLING THE TOXICITY OF NANOPARTICLES	Advances in Experimental Medicine and Biology											The development and implementation of safe-by-design strategies is key for the safe development of future generations of nanotechnology enabled products. The safety testing of the huge variety of nanomaterials that can be synthetized is unfeasible due to time and cost constraints. Computational modeling facilitates the implementation of alternative testing strategies in a time and cost effective …					Fernández-Sabater, Alberto/G-1214-2011; Schüürmann, Gerrit/E-7962-2017; Brehm, Martin/L-5258-2017; Tamm, Tarmo/J-2847-2013; Rallo, Robert/F-4703-2010; Mädler, Lutz/F-2982-2013; Pokhrel, Suman/I-5861-2013; Tämm, Kaido/A-6505-2013; Scott-Fordsmand, Janeck/J-6019-2013; Roca, Carlos P./F-3846-2014; Kahru, Anne/C-4927-2008; Sikk, Lauri/H-2183-2019	Fernández-Sabater, Alberto/0000-0002-1241-1646; Schüürmann, Gerrit/0000-0002-3789-1703; Brehm, Martin/0000-0002-6861-459X; Tamm, Tarmo/0000-0003-0466-2514; Rallo, Robert/0000-0003-3812-4458; Mädler, Lutz/0000-0002-7073-0733; Pokhrel, Suman/0000-0001-5712-2824; Tämm, Kaido/0000-0002-7401-4435; Escorihuela Marti, Laura/0000-0002-6350-2396; Burk, Peeter/0000-0001-5503-664X; Scott-Fordsmand, Janeck/0…												0065-2598	2214-8019	978-3-319-47754-1; 978-3-319-47752-7				2017	947
J	Guo, ZL; Chakraborty, S; Monikh, FA; Varsou, DD; Chetwynd, AJ; Afantitis, A; Lynch, I; Zhang, P				Guo, Zhiling; Chakraborty, Swaroop; Monikh, Fazel Abdolahpur; Varsou, Dimitra-Danai; Chetwynd, Andrew J.; Afantitis, Antreas; Lynch, Iseult; Zhang, Peng			Surface Functionalization of Graphene-Based Materials: Biological Behavior, Toxicology, and Safe-By-Design Aspects	ADVANCED BIOLOGY												The increasing exploitation of graphene-based materials (GBMs) is driven by their unique properties and structures, which ignite the imagination of scientists and engineers. At the same time, the very properties that make them so useful for applications lead to growing concerns regarding their potential impacts on human health and the environment. Since GBMs are inert to reaction, various attempt…					Zhang, Peng/H-9461-2018; Chakraborty, Swaroop/AAD-6904-2021; Lynch, Iseult/I-3915-2014; Guo, Zhiling/AAJ-6843-2020; Chetwynd, Andrew J./Q-2773-2017; Afantitis, Antreas/A-9637-2010	Zhang, Peng/0000-0002-2774-5534; Chakraborty, Swaroop/0000-0002-4388-4964; Lynch, Iseult/0000-0003-4250-4584; Guo, Zhiling/0000-0001-9549-2164; Chetwynd, Andrew J./0000-0001-6648-6881; Afantitis, Antreas/0000-0002-0977-8180												2701-0198					SEP	2021	5	9
J	Ziegler, M; Aulbach, B				Ziegler, Martin; Aulbach, Benjamin			Universal Design Charts for the Safe Verification of Resistance to Failure by Hydraulic Heave	WASSERWIRTSCHAFT					15th German Dam Symposium	APR 14-16, 2010	Aachen, GERMANY					As the use of prevalent calculation methods for the proof of safety against hydraulic heave often leads to unsafe results extensive investigations about the safety against hydraulic heave have been carried out at the chair of geotechnical engineering at RWTH Aachen University. As a result of these investigations dimensionless design charts based on the analysis of flow nets have been developed in…																		0043-0978						2010	100	4
J	Varsou, DD; Afantitis, A; Tsoumanis, A; Melagraki, G; Sarimveis, H; Valsami-Jones, E; Lynch, I				Varsou, Dimitra-Danal; Afantitis, Antreas; Tsoumanis, Andreas; Melagraki, Georgia; Sarimveis, Haraiambos; Valsami-Jones, Eugenia; Lynch, Iseult			A safe-by-design tool for functionalised nanomaterials through the Enalos Nanoinformatics Cloud platform	NANOSCALE ADVANCES												Multi-walled carbon nanotubes are currently used in numerous industrial applications and products, therefore fast and accurate evaluation of their biological and toxicological effects is of utmost importance. Computational methods and techniques, previously applied in the area of cheminformatics for the prediction of adverse effects of chemicals, can also be applied in the case of nanomaterials (…					Lynch, Iseult/I-3915-2014; Afantitis, Antreas/A-9637-2010; Melagraki, Georgia/AAR-7807-2020; Valsami-Jones, Eugenia/I-1736-2016	Lynch, Iseult/0000-0003-4250-4584; Afantitis, Antreas/0000-0002-0977-8180; Melagraki, Georgia/0000-0001-7547-2342; Valsami-Jones, Eugenia/0000-0002-8850-7556; Varsou, Dimitra-Danai/0000-0002-7474-7014; Tsoumanis, Andreas/0000-0002-8512-4509												2516-0230					FEB 1	2019	1	2
J	Krouwel, SJC; Dierickx, ER; Heesterbeek, S; Klaassen, P				Krouwel, Sam Jan Cees; Dierickx, Emma Rianne; Heesterbeek, Sara; Klaassen, Pim			Adopting Safe-by-Design in Science and Engineering Academia: The Soil May Need Tilling	INTERNATIONAL JOURNAL OF ENVIRONMENTAL RESEARCH AND PUBLIC HEALTH												In recent years, Safe-by-Design (SbD) has been launched as a concept that supports science and engineering such that a broad conception of safety is embraced and structurally embedded. The present study explores the extent to which academics in a distinctively relevant subset of science and engineering disciplines are receptive towards the work and teaching practices SbD would arguably imply. Thr…																			1660-4601				FEB	2022	19	4
J	Marks, ED; Cheng, T; Teizer, J				Marks, Eric D.; Cheng, Tao; Teizer, Jochen			Laser Scanning for Safe Equipment Design That Increases Operator Visibility by Measuring Blind Spots	JOURNAL OF CONSTRUCTION ENGINEERING AND MANAGEMENT												One-fourth of construction industry fatalities are caused by worker collisions with construction equipment. Nonvisible areas (blind spots) for equipment operators are contributing factors to many of these fatalities because equipment operators are unable to see ground personnel at certain locations around their equipment. Presented are the design and validation of a unique technique for measuring…					Teizer, Jochen/AAS-1814-2020	Teizer, Jochen/0000-0001-8071-895X												0733-9364					AUG 1	2013	139	8
J	Loulou, I; Jmaiel, M; Drira, K; Kacem, AH				Loulou, Imen; Jmaiel, Mohamed; Drira, Khalil; Kacem, Ahmed Hadj			P/S-CoM: Building correct by design Publish/Subscribe architectural styles with safe reconfiguration	JOURNAL OF SYSTEMS AND SOFTWARE												We present P/S-CoM, a formal approach supporting the correct modeling of Publish/Subscribe architectural styles and safe reconfiguration of dynamic architectures for event-based communication. We elaborate a set of patterns and we define the corresponding composition rules to build correct by design Publish/Subscribe styles. The defined patterns and rules respect the principle of information diss…					Drira, Khalil/R-9913-2018													0164-1212	1873-1228				MAR	2010	83	3
J	Fulop, T; Kozma, GT; Vashegyi, I; Meszaros, T; Rosivall, L; Urbanics, R; Storm, G; Metselaar, JM; Szebeni, J				Fulop, Tamas; Kozma, Gergely T.; Vashegyi, Ildiko; Meszaros, Tamas; Rosivall, Laszlo; Urbanics, Rudolf; Storm, Gert; Metselaar, Josbert M.; Szebeni, Janos			Liposome-induced hypersensitivity reactions: Risk reduction by design of safe infusion protocols in pigs	JOURNAL OF CONTROLLED RELEASE					Annual Meeting of the Controlled-Release-Society (CRS)	JUL 22-24, 2018	New York, NY	Controlled Release Soc				Intravenous administration of liposomal drugs can entail infusion reactions, also known as hypersensitivity reactions (HSRs), that can be severe and sometimes life-threatening in a small portion of patients. One empirical approach to prevent these reactions consists of lowering the infusion speed and extending the infusion time of the drug. However, different liposomal drugs have different levels…																		0168-3659	1873-4995				SEP 10	2019	309
J	Chang, Y; Li, K; Feng, YL; Liu, N; Cheng, Y; Sun, XJ; Feng, YQ; Li, X; Wu, ZJ; Zhang, HY				Chang, Yun; Li, Kai; Feng, Yanlin; Liu, Ning; Cheng, Yan; Sun, Xiujuan; Feng, Yuqing; Li, Xi; Wu, Zhijian; Zhang, Haiyuan			Crystallographic facet-dependent stress responses by polyhedral lead sulfide nanocrystals and the potential safe-by-design approach	NANO RESEARCH												The particular physicochemical properties of nanomaterials are able to elicit unique biological responses. The property activity relationship is usually established for in-depth understanding of toxicity mechanisms and designing safer nanomaterials. In this study, the toxic role of specific crystallographic facets of a series of polyhedral lead sulfide (PbS) nanocrystals, including truncated octa…					Feng, Yanlin/AAA-4596-2022; Zhang, Haiyuan/D-2095-2012; Cheng, Yan/U-8483-2018; Zhang, Haiyuan/AAF-6791-2020; Li, Xi/K-2645-2014; Chang, Yun/AAA-4534-2022; Zhang, Haiyuan/F-4176-2015	Feng, Yanlin/0000-0003-4857-4567; Cheng, Yan/0000-0002-2471-2219; Li, Xi/0000-0002-8103-3191; Chang, Yun/0000-0003-0731-7943;												1998-0124	1998-0000				DEC	2016	9	12
J	Karayannis, P; Petrakli, F; Gkika, A; Koumoulos, EP				Karayannis, Panagiotis; Petrakli, Fotini; Gkika, Anastasia; Koumoulos, Elias P.			3D-Printed Lab-on-a-Chip Diagnostic Systems-Developing a Safe-by-Design Manufacturing Approach	MICROMACHINES												The aim of this study is to provide a detailed strategy for Safe-by-Design (SbD) 3D-printed lab-on-a-chip (LOC) device manufacturing, using Fused Filament Fabrication (FFF) technology. First, the applicability of FFF in lab-on-a-chip device development is briefly discussed. Subsequently, a methodology to categorize, identify and implement SbD measures for FFF is suggested. Furthermore, the most c…						Gkika, Anastasia/0000-0003-1732-8240; Petrakli, Foteini/0000-0001-8935-8399; Karagiannis, Panagiotis/0000-0001-9281-6071													2072-666X				DEC	2019	10	12
J	Rodrigues, AF; Newman, L; Jasim, D; Mukherjee, SP; Wang, J; Vacchi, IA; Menard-Moyon, C; Bianco, A; Fadeel, B; Kostarelos, K; Bussy, C				Rodrigues, Artur Filipe; Newman, Leon; Jasim, Dhifaf; Mukherjee, Sourav P.; Wang, Jun; Vacchi, Isabella A.; Menard-Moyon, Cecilia; Bianco, Alberto; Fadeel, Bengt; Kostarelos, Kostas; Bussy, Cyrill			Size-Dependent Pulmonary Impact of Thin Graphene Oxide Sheets in Mice: Toward Safe-by-Design	ADVANCED SCIENCE												Safety assessment of graphene-based materials (GBMs) including graphene oxide (GO) is essential for their safe use across many sectors of society. In particular, the link between specific material properties and biological effects needs to be further elucidated. Here, the effects of lateral dimensions of GO sheets in acute and chronic pulmonary responses after single intranasal instillation in mi…					Kostarelos, Kostas/AAP-6879-2021; Rodrigues, Artur/I-4382-2015; Bussy, Cyrill/C-7190-2008	Kostarelos, Kostas/0000-0002-2224-6672; Rodrigues, Artur/0000-0002-4078-3455; Bussy, Cyrill/0000-0001-8870-443X; Newman, Leon/0000-0003-2099-2660													2198-3844				JUN	2020	7	12
J	Bae, SY; Lee, SY; Kim, JW; Umh, HN; Jeong, J; Bae, S; Yi, J; Kim, Y; Choi, J				Bae, Su-Yong; Lee, Su Young; Kim, Ji-Wan; Umh, Ha Nee; Jeong, Jaeseong; Bae, Seongjun; Yi, Jongheop; Kim, Younghun; Choi, Jinhee			Hazard potential of perovskite solar cell technology for potential implementation of safe-by-design approach	SCIENTIFIC REPORTS												The perovskite solar cell (PSC) is a rapidly advancing solar technology with high efficiencies and low production costs. However, as the PSC contains methylammonium lead iodide (CH3NH3PbI3, MAPbI(3)) in the light-harvesting active layer, addressing the safety issue of PSCs is an important prerequisite for its commercialization. In this study, the potential hazards of the PSC were investigated wit…																		2045-2322					MAR 12	2019	9
J	Yan, LA; Zhao, F; Li, SJ; Hu, ZB; Zhao, YL				Yan, Liang; Zhao, Feng; Li, Shoujian; Hu, Zhongbo; Zhao, Yuliang			Low-toxic and safe nanomaterials by surface-chemical design, carbon nanotubes, fullerenes, metallofullerenes, and graphenes	NANOSCALE												The toxicity grade for a bulk material can be approximately determined by three factors (chemical composition, dose, and exposure route). However, for a nanomaterial it depends on more than ten factors. Interestingly, some nano-factors (like huge surface adsorbability, small size, etc.) that endow nanomaterials with new biomedical functions are also potential causes leading to toxicity or damage …						Yan, Liang/0000-0003-2925-5544; Zhao, Feng/0000-0001-8567-7501												2040-3364	2040-3372					2011	3	2
J	Ishmaev, G; Vermaas, PE; Hoeneveld, D; van Gelder, P				Ishmaev, Georgy; Vermaas, Pieter E.; Hoeneveld, Dick; van Gelder, Pieter			Safe by Design Regulation for Academic Experimentation and Value Conflicts: An Exploration of Solution Directions	INTERNATIONAL JOURNAL OF ENVIRONMENTAL RESEARCH AND PUBLIC HEALTH												In this paper, we explore solution directions for the implementation of Safe by Design (SbD) in safety regimes for academic experimentation. SbD is a dynamic and anticipatory strategy for safety regulation in academic research. In this strategy, safety is taken in a broader sense including not only issues of technical precaution of avoiding risks of experimentation but also the societal responsib…					; van Gelder, Pieter/D-5834-2014	Hoeneveld, Dick/0000-0002-5950-4567; van Gelder, Pieter/0000-0002-0001-0351													1660-4601				FEB	2021	18	4
J	Hua, M; Liang, XM; Wei, CY; Zhang, L; Pan, XH; Jiang, JJ; Ni, L; Jiang, JC				Hua, Min; Liang, Xinmiao; Wei, Chen-Ye; Zhang, Lu; Pan, Xuhai; Jiang, Jiajia; Ni, Lei; Jiang, Juncheng			Inherent safer design for chemical process of 1,4-dioldiacetate-2-butene oxidized by ozone	CHEMICAL ENGINEERING COMMUNICATIONS												Oxidation reaction is the typical thermal runaway reaction, and the reaction of 1, 4-dioldiacetate-2-Butene oxidized by ozone was investigated in this study. Firstly, the thermal hazards of the oxidative exothermic reactions were identified and evaluated combined process risk assessment method. The Qualitative Assessment for Inherently Safer Design (QAISD) was used to identify the risk of the rea…																		0098-6445	1563-5201				OCT 2	2020	207	10
J	Wong, CK				Wong, C. K.			Designs for Safer Signal-Controlled Intersections by Statistical Analysis of Accident Data at Accident Blacksites	IEEE ACCESS												This paper describes the collection and statistical analysis of accident counts and intersection layout geometries at a range of signal-controlled intersections, with the aim of improving safety at these sites. Negative binomial regression analysis is conducted to relate the accident count data as a dependent variable, with various independent variables to capture the intersection layout and lane…						Wong, C.K./0000-0002-9943-4778												2169-3536						2019	7
J	Suraud, MG				Suraud, Marie-Gabrielle			From Safe by Design to Scientific Changes: Unforeseen Effects of Controversy Surrounding Nanotechnology in France	NANOETHICS												Based on fieldwork, this article highlights the unexpected effects of controversies about nanotechnology in France. These controversies stem in particular from a strong challenge to the field by civil society protests and criticism concerning environmental and health risks. One reason for this challenge is the specific difficulties in assessing the toxicity and ecotoxicity of nanomaterials. Civil…																		1871-4757	1871-4765				AUG	2019	13	2
C	Vazquez, D; Quirante, N; Ruiz-Femenia, R; Fernandez, MJ; Salcedo-Diaz, R; Gomez-Rico, MF; Caballero, JA		Espuna, A; Graells, M; Puigjaner, L		Vazquez, Daniel; Quirante, Natalia; Ruiz-Femenia, Ruben; Fernandez, Maria J.; Salcedo-Diaz, Raquel; Francisca Gomez-Rico, M.; Caballero, Jose A.			Systematic Methods for Inherently Safer Process Design: Comparison among Inherent Safety Indexes by Dimensionality Reduction	27TH EUROPEAN SYMPOSIUM ON COMPUTER AIDED PROCESS ENGINEERING, PT A	Computer Aided Chemical Engineering				27th European Symposium on Computer-Aided Process Engineering (ESCAPE)	OCT 01-05, 2017	Barcelona, SPAIN					In this paper, we introduce inherent safety in the design of chemical processes. We selected three safety index with different characteristics, together with the total annualized cost. While the interpretation of results in a large multidimensional space is difficult we propose an objective reduction through a Principal Component Analysis (PCA). The multiobjective optimization of a distillation c…					Quirante, Natalia/M-6975-2015; Díaz, Raquel Salcedo/H-7891-2015; Quirante, Natalia/AAU-4938-2021; , Reubens/H-7931-2015; Fernandez, Michael/D-2889-2009; Caballero, Jose A/B-7567-2011	Quirante, Natalia/0000-0002-0575-7294; Díaz, Raquel Salcedo/0000-0001-8290-0595; Quirante, Natalia/0000-0002-0575-7294; , Reubens/0000-0003-0652-5177; Fernandez, Michael/0000-0003-2273-733X; Caballero, Jose A/0000-0001-6470-2907; Vazquez Vazquez, Daniel/0000-0001-9380-3918												1570-7946		978-0-444-64080-2				2017	40A
J	Viela, F; Navarro-Baena, I; Jacobo-Martin, A; Hernandez, JJ; Boyano-Escalera, M; Osorio, MR; Rodriguez, I				Viela, Felipe; Navarro-Baena, Ivan; Jacobo-Martin, Alejandra; Hernandez, Jaime J.; Boyano-Escalera, Marta; Osorio, Manuel R.; Rodriguez, Isabel			Nano-engineering safer-by-design nanoparticle based moth-eye mimetic bactericidal and cytocompatible polymer surfaces	RSC ADVANCES												Nanotechnology provides a new design paradigm for alternative antibacterial strategies in the fight against drug-resistant bacteria. In this paper, the enhanced bactericidal action of moth-eye nanocomposite surfaces with a collaborative nanoparticle functional and topography structural mode of action is reported. The moth-eye nanocomposite surfaces are fabricated in combined processing steps of n…					Viela, Felipe/L-7143-2018; Rueda, Jaime J. Hernandez/ABD-7090-2020; Rueda, Jaime J. Hernandez/B-4778-2019; Rodriguez, Isabel/G-3178-2016	Viela, Felipe/0000-0003-0566-9291; Rueda, Jaime J. Hernandez/0000-0002-4368-2529; Rueda, Jaime J. Hernandez/0000-0002-4368-2529; Rodriguez, Isabel/0000-0002-7178-8275; Jacobo-Martin, Alejandra/0000-0003-2404-2881; Osorio, Manuel R./0000-0001-7875-6316												2046-2069						2018	8	40
J	Le, TC; Yin, H; Chen, R; Chen, YD; Zhao, L; Casey, PS; Chen, CY; Winkler, DA				Le, Tu C.; Yin, Hong; Chen, Rui; Chen, Yandong; Zhao, Lin; Casey, Philip S.; Chen, Chunying; Winkler, David A.			An Experimental and Computational Approach to the Development of ZnO Nanoparticles that are Safe by Design	SMALL												Zinc oxide nanoparticles have found wide application due to their unique optoelectronic and photocatalytic characteristics. However, their safety aspects remain of critical concern, prompting the use of physicochemical modifications of pristine ZnO to reduce any potential toxicity. However, the relationships between these modifications and their effects on biology are complex and still relatively…					Chen, Rui/D-4733-2017; Administrator, CMSS/E-3491-2015; Chen, Rui/AAD-6700-2019; Winkler, David A/A-3774-2008; Casey, Philip S/G-1415-2012; Chen, Chunying/AAA-2891-2021	Chen, Rui/0000-0002-6488-6133; Chen, Rui/0000-0002-6488-6133; Winkler, David A/0000-0002-7301-6076; Chen, Chunying/0000-0002-6027-0315; Winkler, David Alan/0000-0003-2423-674X; Le, Tu/0000-0003-3552-8211												1613-6810	1613-6829				JUL 13	2016	12	26
J	Borges, T; Silva, MJ; Louro, H				Borges, T.; Silva, M. J.; Louro, H.			Moving towards a safe by design approach for ENM: Linking ENM relevant properties to toxicological concerns	TOXICOLOGY LETTERS					51st Congress of the European-Societies-of-Toxicology (EUROTOX)	SEP 13-16, 2015	Portuguese Soc Pharmacol, Sect Toxicol, Porto, PORTUGAL	European Soc Toxicol	Portuguese Soc Pharmacol, Sect Toxicol								Louro, Henriqueta/P-1893-2019; Silva, Maria/Q-1605-2019	Silva, Maria/0000-0002-6060-0716; Louro, Henriqueta/0000-0001-9744-7332												0378-4274	1879-3169				OCT 16	2015	238	2		S
J	Lewinska, A; Domzal-Kedzia, M; Jaromin, A; Lukaszewicz, M				Lewinska, Agnieszka; Domzal-Kedzia, Marta; Jaromin, Anna; Lukaszewicz, Marcin			Nanoemulsion Stabilized by Safe Surfactin from Bacillus subtilis as a Multifunctional, Custom-Designed Smart Delivery System	PHARMACEUTICS												The developing field of bio-nanotechnology aims to advance colloidal research via the introduction of multifunctional nanoparticles to augment the dermal effectiveness of active substances. Self-emulsifying drug delivery systems (SEDDS)-isotropic mixtures of oils, surfactants, solvents and co-solvents or surfactants-are attracting interest in the cosmeceutical field. As part of this study, SEDDS …					Jaromin, Anna/AAH-4989-2019; Lukaszewicz, Marcin/K-8441-2013	Domzal-Kedzia, Marta/0000-0002-4001-9983; Lewinska, Agnieszka/0000-0001-9821-8793; Lukaszewicz, Marcin/0000-0002-1453-8376; Jaromin, Anna/0000-0002-7921-8007													1999-4923				OCT	2020	12	10
J	Labille, J; Catalano, R; Slomberg, D; Motellier, S; Pinsino, A; Hennebert, P; Santaella, C; Bartolomei, V				Labille, Jerome; Catalano, Riccardo; Slomberg, Danielle; Motellier, Sylvie; Pinsino, Annalisa; Hennebert, Pierre; Santaella, Catherine; Bartolomei, Vincent			Assessing Sunscreen Lifecycle to Minimize Environmental Risk Posed by Nanoparticulate UV-Filters - A Review for Safer-by-Design Products	FRONTIERS IN ENVIRONMENTAL SCIENCE												Sunscreens are of emerging concern regarding environmental effect. After leaving the skin either through bathing or washing, the ingredients contained in the product formulation can be released into rivers, lakes, seashores, and/or sewage treatment plants. Nanomaterials used as UV-filters are of particular concern in this context as they may have a negative effect on these systems. To assess the …					Pinsino, Annalisa/AAW-8010-2020; SANTAELLA, Catherine/J-7967-2016	Pinsino, Annalisa/0000-0002-0021-3909; SANTAELLA, Catherine/0000-0003-3878-2733													2296-665X				JUL 10	2020	8
J	Laisney, J; Rosset, A; Bartolomei, V; Predoi, D; Truffier-Boutry, D; Artous, S; Berge, V; Brochard, G; Michaud-Soret, I				Laisney, Jerome; Rosset, Aurelie; Bartolomei, Vincent; Predoi, Daniela; Truffier-Boutry, Delphine; Artous, Sebastien; Berge, Virginie; Brochard, Gregory; Michaud-Soret, Isabelle			TiO2 nanoparticles coated with bio-inspired ligands for the safer-by-design development of photocatalytic paints	ENVIRONMENTAL SCIENCE-NANO												Addition of titanium dioxide nanoparticles (TiO2 NPs) in photocatalytic paints represents a promising alternative aiming to mineralize gaseous pollutants, such as volatile organic compounds (VOCs). However, the risks of release of nanoparticles to human health and the environmental impact have to be taken carefully into account for their development. To take into account these risks, we develop a…					Laisney, Jérôme/AAZ-7601-2021	Laisney, Jerome/0000-0003-4548-9471; Michaud-Soret, Isabelle/0000-0002-8936-4964; Rosset, Aurelie/0000-0002-2451-7157												2051-8153	2051-8161				JAN 1	2021	8	1
J	Toybou, D; Celle, C; Aude-Garcia, C; Rabilloud, T; Simonato, JP				Toybou, Djadidi; Celle, Caroline; Aude-Garcia, Catherine; Rabilloud, Thierry; Simonato, Jean-Pierre			A toxicology-informed, safer by design approach for the fabrication of transparent electrodes based on silver nanowires	ENVIRONMENTAL SCIENCE-NANO												Fabrication of silver nanowires (AgNWs) with fine and independent control of both the diameter (from 30 to 120 nm) and length (from 5 to 120 mu m) by concomitant addition of co-nucleants and temperature control is demonstrated, and used for the preparation of size standards. Percolating random networks were fabricated using these standards and their optoelectronic properties were measured and com…					SIMONATO, jean-pierre/AAA-5250-2021	CELLE, Caroline/0000-0001-6652-5326; SIMONATO, Jean-Pierre/0000-0002-0217-4237												2051-8153	2051-8161				FEB 1	2019	6	2
C	Alberto, R; Peixoto, M; Farinha, M; Cabral, A; Estrela, M; Silva, E; Rato, R		Gomes, JFS; Meguid, SA		Alberto, Rita; Peixoto, Marina; Farinha, Maria; Cabral, Ana; Estrela, Marco; Silva, Eduardo; Rato, Ricardo			SAFE-BY-DESIGN IMPLEMENTATION APPROACH IN PRODUCTION SYSTEMS - CASE STUDY, PROTECTIVE COMPOSITE COATINGS BASED IN NANO PARTICLES	PROCEEDINGS OF THE 7TH INTERNATIONAL CONFERENCE ON MECHANICS AND MATERIALS IN DESIGN (M2D2017)					7th International Conference on Mechanics and Materials in Design (M2D)	JUN 11-15, 2017	Albufeira, PORTUGAL	Univ Porto, Fac Engn, Univ Toronto, Mech & Aerosp Design Lab, Univ Algarve, Inst Super Engn, Portuguese Assoc Expt Mech, European Soc Expt Mech, Amer Soc Expt Mech, Japanese Soc Mech Engn, Int Measurement Confederat, Assoc Francaise Mecanique, European Assoc Dynam Mat, Inst Ciencia & Inovacao Enga Mecanica & Enga Ind, Lab Biomecanica Porto, Fundacao Ciencia Technologia, ABREU, Profess Congress Or…				Nanotechnology focuses primarily on the characterization, manipulation, manufacture and application of materials with extremely small dimensions, in a nanoscale. The unique properties of engineered nanomaterials are an unquestionable advantage for technological applications. However, there is a need to proceed responsibly because published toxicological studies demonstrate that some nanomaterials…																				978-989-98832-7-7				2017
J	Matsumoto, R; Inoue, N; Nakao, T; Nakashima, M; Yamane, R; Yanagihara, K				Matsumoto, R.; Inoue, N.; Nakao, T.; Nakashima, M.; Yamane, R.; Yanagihara, K.			NURSES CAN CONTRIBUTE TO SAFE CANCER CHEMOTHERAPY BY THE DESIGN ON ELECTRIC CHARTS TO EVALUATE ADVERSE EVENTS	ANNALS OF ONCOLOGY					11th Annual Meeting of the Japanese-Society-of-Medical-Oncology	AUG 29-31, 2013	Sendai, JAPAN	Japanese Soc Med Oncol																						0923-7534	1569-8041				NOV	2013	24			9
J	Catalano, R; Slomberg, DL; Picard, C; Hucher, N; Vidal, V; Saint-Antonin, F; Hubaud, JC; Rose, J; Labille, J				Catalano, Riccardo; Slomberg, Danielle L.; Picard, Celine; Hucher, Nicolas; Vidal, Vladimir; Saint-Antonin, Francois; Hubaud, Jean-Claude; Rose, Jerome; Labille, Jerome			In situ determination of engineered nanomaterial aggregation state in a cosmetic emulsion - toward safer-by-design products	ENVIRONMENTAL SCIENCE-NANO												Engineered nanomaterials (ENMs) can be used in cosmetics as UV blockers. For these products, the exposure-driven risk for humans and the environment is related to the ENM release during or after use, and thus to the original surface properties and aggregation state of the ENMs. Moreover, as the ENM dispersion in the product also affects the efficiency to screen UV rays, optimizing the formulation…					ROSE, Jerome/J-5063-2017; Labille, Jerome/H-1033-2016	ROSE, Jerome/0000-0003-3071-8147; Labille, Jerome/0000-0002-4033-537X												2051-8153	2051-8161				DEC 9	2021	8	12
J	Rizzo, R; Musolino, A; Bucchi, F; Forte, P; Frendo, F				Rizzo, Rocco; Musolino, Antonino; Bucchi, Francesco; Forte, Paola; Frendo, Francesco			Magnetic FEM Design and Experimental Validation of an Innovative Fail-Safe Magnetorheological Clutch Excited by Permanent Magnets	IEEE TRANSACTIONS ON ENERGY CONVERSION												This paper describes the magnetic design of an innovative fail-safe clutch based on magnetorheological fluid (MRF). A cylindrical arrangement of permanent magnets (PMs) is used to excite the fluid. The suitable distribution of magnetic field inside the MRF and the transmissible torque is obtained by moving the PMs along the axial direction. The device is designed using a magneto/mechanical FEM mo…					Musolino, Antonino/U-2170-2019	MUSOLINO, ANTONINO/0000-0002-4351-1690; RIZZO, ROCCO/0000-0001-6555-4731; Bucchi, Francesco/0000-0001-7840-3158												0885-8969	1558-0059				SEP	2014	29	3
J	Veedhi, S; Sawant, A				Veedhi, Srinivasarao; Sawant, Anil			Designing a safer process for the reaction of TFA with sodium borohydride in THF by calorimetric technique	JOURNAL OF THERMAL ANALYSIS AND CALORIMETRY												Reaction of TFA with sodium borohydride in THF is a loss of thermal control involving the evolution of Hydrogen gas. The investigation of the process by RC1e and ARSST showed that the criticality class of the reaction is dependant on the addition of TFA. Heat of reaction (Q (r)), adiabatic temperature rise (Delta T (ad)), and MTSR data are obtained from RC1e experiment. Exothermic onset temperatu…																		1388-6150					FEB	2013	111	2
J	Dekkers, S; Wijnhoven, SWP; Braakhuis, HM; Soeteman-Hernandez, LG; Sips, AJAM; Tavernaro, I; Kraegeloh, A; Noorlander, CW				Dekkers, Susan; Wijnhoven, Susan W. P.; Braakhuis, Hedwig M.; Soeteman-Hernandez, Lya G.; Sips, Adrienne J. A. M.; Tavernaro, Isabella; Kraegeloh, Annette; Noorlander, Cornelle W.			Safe-by-Design part I: Proposal for nanospecific human health safety aspects needed along the innovation process	NANOIMPACT												Safe-by-Design aims to reduce uncertainties and/or increase the human health and environmental safety from already early in the innovation process onwards and will thereby contribute to increased innovation efficiency, economic viability, interdisciplinary collaboration, consumers trust and improve sustainability. Since most innovators or designers are neither toxicologists nor risk assessors, co…						Soeteman-Hernandez, Lya G./0000-0003-3529-3694												2452-0748					APR	2020	18
J	Shandilya, N; Capron, I				Shandilya, N.; Capron, I.			Safer-by-design hybrid nanostructures: an alternative to conventional titanium dioxide UV filters in skin care products	RSC ADVANCES												For sustainable development of nanotechnology, nanomaterials should follow a safer-by-design approach so that the associated exposure and hazard risks throughout their entire life cycle can be minimized without compromising their functioning efficiency. In this context, we present organic-inorganic hybrid nanostructures composed of titanium dioxide (TiO2) nanoparticles grafted onto cellulose nano…					Shandilya, Neeraj/AAX-3862-2020	Shandilya, Neeraj/0000-0003-3328-8517													2046-2069					2017	7	33
J	Sinha, M; Gupta, A; Gupta, S; Singh, P; Pandit, S; Chauhan, SS; Parthasarathi, R				Sinha, Meetali; Gupta, Anshika; Gupta, Shristee; Singh, Prakrity; Pandit, Shraddha; Chauhan, Shweta Singh; Parthasarathi, Ramakrishnan			Analogue discovery of safer alternatives to HCQ and CQ drugs for SAR-CoV-2 by computational design	COMPUTERS IN BIOLOGY AND MEDICINE												COVID-19 outbreak poses a severe health emergency to the global community. Due to availability of limited data, the selection of an effective treatment is a challenge. Hydroxychloroquine (HCQ), a chloroquine (CQ) derivative administered for malaria and autoimmune diseases, has been shown to be effective against both Severe Acute Respiratory Syndrome (SARS-CoV-1) and SARS-CoV-2. Apart from the kno…					Parthasarathi, Ramakrishnan/AAB-1211-2021; Sinha, Meetali/AAX-6956-2021	Parthasarathi, Ramakrishnan/0000-0001-5417-5867; Sinha, Meetali/0000-0003-4305-5442; pandit, shraddha/0000-0003-4583-671X												0010-4825	1879-0534				MAR	2021	130
J	Robaey, Z; Spruit, SL; van de Poel, I				Robaey, Zoe; Spruit, Shannon L.; van de Poel, Ibo			The Food Warden: An Exploration of Issues in Distributing Responsibilities for Safe-by-Design Synthetic Biology Applications	SCIENCE AND ENGINEERING ETHICS												The Safe-by-Design approach in synthetic biology holds the promise of designing the building blocks of life in an organism guided by the value of safety. This paves a new way for using biotechnologies safely. However, the Safe-by-Design approach moves the bulk of the responsibility for safety to the actors in the research and development phase. Also, it assumes that safety can be defined and unde…					Robaey, Zoë/AAT-3455-2020; van de Poel, Ibo/ABB-9362-2020	Spruit, Shannon/0000-0001-9252-5741; /0000-0002-9553-5651												1353-3452	1471-5546				DEC	2018	24	6
J	Wolska-Pietkiewicz, M; Tokarska, K; Grala, A; Wojewodzka, A; Chwojnowska, E; Grzonka, J; Cywinski, PJ; Kruczala, K; Sojka, Z; Chudy, M; Lewinski, J				Wolska-Pietkiewicz, Malgorzata; Tokarska, Katarzyna; Grala, Agnieszka; Wojewodzka, Anna; Chwojnowska, Elzbieta; Grzonka, Justyna; Cywinski, Piotr J.; Kruczala, Krzysztof; Sojka, Zbigniew; Chudy, Michal; Lewinski, Janusz			Safe-by-Design Ligand-Coated ZnO Nanocrystals Engineered by an Organometallic Approach: Unique Physicochemical Properties and Low Toxicity toward Lung Cells	CHEMISTRY-A EUROPEAN JOURNAL												The unique physicochemical properties and biocompatibility of zinc oxide nanocrystals (ZnO NCs) are strongly dependent on the nanocrystal/ligand interface, which is largely determined by synthetic procedures. Stable ZnO NCs coated with a densely packed shell of 2-(2-methoxyethoxy)acetate ligands, which act as miniPEG prototypes, with average core size and hydrodynamic diameter of 4-5 and about 12…					Kruczala, Krzysztof/W-5101-2017; Grzonka, Justyna/AAH-3494-2020	Kruczala, Krzysztof/0000-0002-1241-6789; Grzonka, Justyna/0000-0002-2902-1767; Wojewodzka, Anna/0000-0003-4563-8748; Wolska-Pietkiewicz, Malgorzata/0000-0003-3161-8455; Lewinski, Janusz/0000-0002-3407-0395; Chwojnowska, Elzbieta/0000-0002-4796-4611; Tokarska, Katarzyna/0000-0002-9003-1884; Chudy, Michal/0000-0001-8530-406X												0947-6539	1521-3765				MAR 15	2018	24	16
J	Remzova, M; Zouzelka, R; Brzicova, T; Vrbova, K; Pinkas, D; Rossner, P; Topinka, J; Rathousky, J				Remzova, Monika; Zouzelka, Radek; Brzicova, Tana; Vrbova, Kristyna; Pinkas, Dominik; Rossner, Pavel; Topinka, Jan; Rathousky, Jiri			Toxicity of TiO2, ZnO, and SiO2 Nanoparticles in Human Lung Cells: Safe-by-Design Development of Construction Materials	NANOMATERIALS												Rapid progress in the development of highly efficient nanoparticle-based construction technologies has not always been accompanied by a corresponding understanding of their effects on human health and ecosystems. In this study, we compare the toxicological effects of pristine TiO2, ZnO, SiO2, and coated SiO2 nanoparticles, and evaluate their suitability as additives to consolidants of weathered c…					Rossner, Pavel/AAI-5789-2020; Rossner, Pavel/H-2569-2014; Pinkas, Dominik/O-9481-2019	Rossner, Pavel/0000-0001-6921-5446; Rossner, Pavel/0000-0001-6921-5446; Pinkas, Dominik/0000-0002-6103-4314; Zouzelka, Radek/0000-0002-8668-2836												2079-4991					JUL	2019	9	7
J	Zheng, RX; Zhang, HY				Zheng, Runxiao; Zhang, Haiyuan			Regulation of Electronic Properties of Metal Oxide Nanoparticles to Reveal Their Toxicity Mechanism and Safe-by-Design Approach	ADVANCED BIOLOGY												Metal oxide (MO) nanoparticles (NPs) are widely applied to medicine, agriculture, industry, and other fields, however, their potential toxicity is often concerned. Various toxicological studies are carried out to investigate the toxicity and underlying mechanism of MO NPs. A series of physicochemical properties of MO NPs, such as primary size, charge, solubility, crystal structure, crystalline ph…																		2701-0198					FEB	2021	5	2
J	Movia, D; Gerard, V; Maguire, CM; Jain, N; Bell, AP; Nicolosi, V; O'Neill, T; Scholz, D; Gun'ko, Y; Volkov, Y; Prina-Mello, A				Movia, Dania; Gerard, Valerie; Maguire, Ciaran Manus; Jain, Namrata; Bell, Alan P.; Nicolosi, Valeria; O'Neill, Tiina; Scholz, Dimitri; Gun'ko, Yurii; Volkov, Yuri; Prina-Mello, Adriele			A safe-by-design approach to the development of gold nanoboxes as carriers for internalization into cancer cells	BIOMATERIALS												Gold nanomaterials are currently raising a significant interest for human welfare in the field of clinical diagnosis, therapeutics for chronic pathologies, as well as of many other biomedical applications. In particular, gold nanomaterials are becoming a promising technology for developing novel approaches and treatments against widespread societal diseases such as cancer. In this study, we inves…					Prina-Mello, Adriele/C-6458-2011; Gun'ko, Yurii/R-5348-2016; Movia, Dania/T-6552-2018; Nicolosi, Valeria/Y-2419-2019; Volkov, Yuri/N-6774-2014	Prina-Mello, Adriele/0000-0002-4371-2214; Gun'ko, Yurii/0000-0002-4772-778X; Movia, Dania/0000-0001-6412-8132; Nicolosi, Valeria/0000-0002-7637-4813; Volkov, Yuri/0000-0001-7406-518X; Maguire, Ciaran Manus/0000-0002-2450-5922; Bell, Alan/0000-0003-2605-3525												0142-9612	1878-5905				MAR	2014	35	9
J	Azmi, IDM; Wibroe, PP; Wu, LP; Kazem, AI; Amenitsch, H; Moghimi, SM; Yaghmur, A				Azmi, Intan D. M.; Wibroe, Peter P.; Wu, Lin-Ping; Kazem, Ali I.; Amenitsch, Heinz; Moghimi, Seyed M.; Yaghmur, Anan			A structurally diverse library of safe-by-design citrem-phospholipid lamellar and non-lamellar liquid crystalline nano-assemblies	JOURNAL OF CONTROLLED RELEASE												Non-lamellar liquid crystalline aqueous nanodispersions, known also as ISAsomes (internally self-assembled 'somes' or nanoparticles), are gaining increasing interest in drug solubilisation and bio-imaging, but they often exhibit poor hemocompatibility and induce cytotoxicity. This limits their applications in intravenous drug delivery and targeting. Using a binary mixture of citrem and soy phosph…					WU, LinPing/E-4343-2012; Azmi, Intan Diana Mat/T-5909-2019	WU, Linping/0000-0001-7579-2987; Yaghmur, Anan/0000-0003-1608-773X; Amenitsch, Heinz/0000-0002-0788-1336; Moghimi, Seyed Moein/0000-0003-0836-926X; Mat Azmi, Intan Diana/0000-0002-0168-3232												0168-3659	1873-4995				OCT 10	2016	239
J	Mantecca, P; Kasemets, K; Deokar, A; Perelshtein, L; Gedanken, A; Bahk, YK; Kianfar, B; Wang, J				Mantecca, Paride; Kasemets, Kaja; Deokar, Archana; Perelshtein, Liana; Gedanken, Aharon; Bahk, Yeon Kyoung; Kianfar, Baharh; Wang, Jing			Airborne Nanoparticle Release and Toxicological Risk from Metal-Oxide-Coated Textiles: Toward a Multiscale Safe-by-Design Approach	ENVIRONMENTAL SCIENCE & TECHNOLOGY												Nano metal oxides have been proposed as alternatives to silver (Ag) nanoparticles (NPs) for antibacterial coatings. Here, cotton and polyester-cotton fabrics were sonochemically coated with zinc oxide (ZnO) and copper oxide (CuO) NPs. By varying the reaction solvent (water or ethanol), NPs with different sizes and shapes were synthesized. The cytotoxic and pro-inflammatory effects of studied NPs …					Kasemets, Kaja/B-9802-2016; Wang, Jing/F-4164-2011	Kasemets, Kaja/0000-0001-6413-3660; Wang, Jing/0000-0003-2078-137X; Mantecca, Paride/0000-0002-6962-049X												0013-936X	1520-5851				AUG 15	2017	51	16
J	Tarantini, A; Wegner, KD; Dussert, F; Sarret, G; Beal, D; Mattera, L; Lincheneau, C; Proux, O; Truffier-Boutry, D; Moriscot, C; Gallet, B; Jouneau, PH; Reiss, P; Carriere, M				Tarantini, Adeline; Wegner, K. David; Dussert, Fanny; Sarret, Geraldine; Beal, David; Mattera, Lucia; Lincheneau, Christophe; Proux, Olivier; Truffier-Boutry, Delphine; Moriscot, Christine; Gallet, Benoit; Jouneau, P. -H.; Reiss, Peter; Carriere, Marie			Physicochemical alterations and toxicity of InP alloyed quantum dots aged in environmental conditions: A safer by design evaluation	NANOIMPACT												Due to their unique optical properties, quantum dots (QDs) are used in a number of optoelectronic devices and are forecasted to be used in the near future for biomedical applications. The most popular QD composition consists of cadmium selenide (CdSe) or cadmium telluride (CdTe), which has been shown to pose health risks due to the release of toxic cadmium (Cd) ions. Due to similar optical proper…					BM30, Beamline FAME/G-9313-2012; Sarret, Geraldine/I-2797-2016; Mattera, Lucia/AAE-7860-2020; Proux, Olivier/F-7344-2012; Reiss, Peter/C-2604-2009	Sarret, Geraldine/0000-0002-1709-3456; Proux, Olivier/0000-0003-0385-1815; MORISCOT, Christine/0000-0001-5707-0999; GALLET, Benoit/0000-0001-8758-7681												2452-0748					FEB	2019	14
J	Ivanova, A; Ivanova, K; Heinze, T; Tzanov, T				Ivanova, Aleksandra; Ivanova, Kristina; Heinze, Thomas; Tzanov, Tzanko			Safe-by-design hybrid nanoparticles of antimicrobial silver, aminocellulose, and quorum quenching acylase eradicate bacteria and their biofilms	ABSTRACTS OF PAPERS OF THE AMERICAN CHEMICAL SOCIETY					National Meeting of the American-Chemical-Society (ACS)	MAR 31-APR 04, 2019	Orlando, FL	Amer Chem Soc									Tzanov, Tzanko/F-1140-2016	Tzanov, Tzanko/0000-0002-8568-1110												0065-7727					MAR 31	2019	257
J	Johnson, L; Aglas, L; Soh, WT; Geppert, M; Hofer, S; Hofstaetter, N; Briza, P; Ferreira, F; Weiss, R; Brandstetter, H; Duschl, A; Himly, M				Johnson, Litty; Aglas, Lorenz; Soh, Wai Tuck; Geppert, Mark; Hofer, Sabine; Hofstaetter, Norbert; Briza, Peter; Ferreira, Fatima; Weiss, Richard; Brandstetter, Hans; Duschl, Albert; Himly, Martin			Structural Alterations of Antigens at the Material Interface: An Early Decision Toolbox Facilitating Safe-by-Design Nanovaccine Development	INTERNATIONAL JOURNAL OF MOLECULAR SCIENCES												Nanomaterials have found extensive interest in the development of novel vaccines, as adjuvants and/or carriers in vaccination platforms. Conjugation of protein antigens at the particle surface by non-covalent adsorption is the most widely used approach in licensed particulate vaccines. Hence, it is essential to understand proteins' structural integrity at the material interface in order to develo…					Briza, Peter/D-7309-2012; Duschl, Albert/E-5872-2011; Ferreira, Fatima/AAB-4321-2019; Brandstetter, Hans/E-6754-2011; Himly, Martin/D-1568-2015	Briza, Peter/0000-0002-4941-6782; Duschl, Albert/0000-0002-7034-9860; Ferreira, Fatima/0000-0003-0989-2335; Brandstetter, Hans/0000-0002-6089-3045; Hofer, Sabine/0000-0003-4986-3539; Himly, Martin/0000-0001-5416-085X; Hofstatter, Norbert/0000-0003-0207-0654													1422-0067				OCT	2021	22	19
J	Alavi, SR; Rahmati, M; Ziaei-Rad, S				Alavi, Seyed Rashid; Rahmati, Mehdi; Ziaei-Rad, Saeed			A new approach to design safe-supported HDD against random excitation by using optimization of rubbers spatial parameters	MICROSYSTEM TECHNOLOGIES-MICRO-AND NANOSYSTEMS-INFORMATION STORAGE AND PROCESSING SYSTEMS					3rd International Conference on Engineering and Technology Innovation (ICETI)	OCT 31-NOV 04, 2014	Kenting, TAIWAN					Hard disk drives (HDDs) of laptop personal computers (LPCs) are devices vulnerable in harsh mechanical environments. Hence, they need to be protected against damages due to vibration in order to have better read/write performance. In the present study, a LPC and its HDD are modeled as a system with two degrees of freedom and the nonlinear optimization method is employed to perform a passive contr…					Rahmati, Mehdi/AAN-6994-2020	Rahmati, Mehdi/0000-0003-4285-2570												0946-7076	1432-1858				JUN	2017	23	6
J	Ruppert, AS; Shoben, AB				Ruppert, Amy S.; Shoben, Abigail B.			Overall success rate of a safe and efficacious drug: Results using six phase 1 designs, each followed by standard phase 2 and 3 designs	CONTEMPORARY CLINICAL TRIALS COMMUNICATIONS												To evaluate the overall success rate of a new drug, phase 1, 2, and 3 trials were simulated using eight toxicity and two non-decreasing efficacy profiles. Six phase 1 designs including the standard 3 + 3, CCD, BOIN, mTPI, mTPI-2, and CRM were considered with standard phase 2 and 3 designs. Based on our results, phase 1 design recommendations are provided when data informing the general shape of t…																			2451-8654				DEC	2018	12
J	Floris, P; Garbujo, S; Rolla, G; Giustra, M; Salvioni, L; Catelani, T; Colombo, M; Mantecca, P; Fiandra, L				Floris, Pamela; Garbujo, Stefania; Rolla, Gabriele; Giustra, Marco; Salvioni, Lucia; Catelani, Tiziano; Colombo, Miriam; Mantecca, Paride; Fiandra, Luisa			The Role of Polymeric Coatings for a Safe-by-Design Development of Biomedical Gold Nanoparticles Assessed in Zebrafish Embryo	NANOMATERIALS												In the biomedical field, gold nanoparticles (GNPs) have attracted the attention of the scientific community thanks to their high potential in both diagnostic and therapeutic applications. The extensive use of GNPs led researchers to investigate their toxicity, identifying stability, size, shape, and surface charge as key properties determining their impact on biological systems, with possible str…						COLOMBO, MIRIAM/0000-0003-3428-5668; /0000-0001-9813-985X; SALVIONI, LUCIA/0000-0002-9385-5926; Mantecca, Paride/0000-0002-6962-049X													2079-4991				APR	2021	11	4
J	Jun, GT; Ward, J; Clarkson, PJ				Jun, Gyuchan Thomas; Ward, James; Clarkson, P. John			Systems modelling approaches to the design of safe healthcare delivery: ease of use and usefulness perceived by healthcare workers	ERGONOMICS												The UK health service, which had been diagnosed to be seriously out of step with good design practice, has been recommended to obtain knowledge of design and risk management practice from other safety-critical industries. While these other industries have benefited from a broad range of systems modelling approaches, healthcare remains a long way behind. In order to investigate the healthcare-spec…					Jun, Gyuchan/B-3348-2011; Ward, James R/T-4393-2017; Ward, James/AAA-1214-2020	Ward, James R/0000-0002-0362-4711; Ward, James/0000-0002-0362-4711; Clarkson, P. John/0000-0001-8018-7706; Jun, Gyuchan Thomas/0000-0002-0958-0107												0014-0139						2010	53	7
J	Trullemans, L; Koelewijn, SF; Scodeller, I; Hendrickx, T; Van Puyvelde, P; Sels, BF				Trullemans, L.; Koelewijn, S. -F.; Scodeller, I.; Hendrickx, T.; Van Puyvelde, P.; Sels, B. F.			A guide towards safe, functional and renewable BPA alternatives by rational molecular design: structure-property and structure-toxicity relationships	POLYMER CHEMISTRY												Over the last few decades extensive research gave unambiguous evidence for the endocrine disrupting nature of bisphenol A (BPA), which has been an indispensable precursor in polymer chemistry since 1946. Unfortunately, current alternatives (e.g., bisphenol F and bisphenol S), are as endocrine active as BPA, emphasizing the need for a more multidisciplinary approach to design BPA alternatives, inc…						Trullemans, Laura/0000-0002-1945-0955; Hendrickx, Tessy/0000-0003-1564-5402; Koelewijn, Steven-Friso/0000-0002-4179-0753; Scodeller, Ivan/0000-0003-0761-9191												1759-9954	1759-9962				OCT 26	2021	12	41
J	Simon, S; Dole, S; Farragher, Y				Simon, Susan; Dole, Shelley; Farragher, Yvonne			Custom-designed and safe-space coaching: Australian beginning principals supported by experienced peers form pipeline of confident future leaders	SCHOOL LEADERSHIP & MANAGEMENT												Transition from teacher to principal involves both a technocratic response based on yearning for certainty' that requisite leadership skills will be learned, and a critically-reflexive approach to adopting a new professional identity (Crow and MOller 2017. Professional Identities of School Leaders across International Contexts: An Introduction and Rationale. Educational Management and Leadership …					Dole, Shelley/AAE-1863-2020; simon, susan/ABD-5635-2020	Dole, Shelley/0000-0003-0073-7662; simon, susan/0000-0003-1657-7341; Sadler, Kylie/0000-0002-3258-3402												1363-2434	1364-2626					2019	39	2
J	Rybinska-Fryca, A; Mikolajczyk, A; Puzyn, T				Rybinska-Fryca, Anna; Mikolajczyk, Alicja; Puzyn, Tomasz			Structure-activity prediction networks (SAPNets): a step beyond Nano-QSAR for effective implementation of the safe-by-design concept	NANOSCALE												A significant number of experimental studies are supported by computational methods such as quantitative structure-activity relationship modeling of nanoparticles (Nano-QSAR). This is especially so in research focused on design and synthesis of new, safer nanomaterials using safe-by-design concepts. However, Nano-QSAR has a number of important limitations. For example, it is not clear which descr…						Rybinska-Fryca, Anna/0000-0001-9985-5081; Puzyn, Tomasz/0000-0003-0449-8339; Mikolajczyk, Alicja/0000-0002-0019-8323												2040-3364	2040-3372				OCT 28	2020	12	40
J	Labille, J; Catalano, R; Slomberg, D; Motellier, S; Pinsino, A; Hennebert, P; Santaella, C; Bartolomei, V				Labille, Jerome; Catalano, Riccardo; Slomberg, Danielle; Motellier, Sylvie; Pinsino, Annalisa; Hennebert, Pierre; Santaella, Catherine; Bartolomei, Vincent			Assessing Sunscreen Lifecycle to Minimize Environmental Risk Posed by Nanoparticulate UV-Filters - A Review for Safer-by-Design Products (vol 8, 101, 2020)	FRONTIERS IN ENVIRONMENTAL SCIENCE																	Pinsino, Annalisa/AAW-8010-2020; SANTAELLA, Catherine/J-7967-2016	Pinsino, Annalisa/0000-0002-0021-3909; SANTAELLA, Catherine/0000-0003-3878-2733													2296-665X				OCT 19	2020	8
J	Ruppert, A; Shoben, AB				Ruppert, Amy; Shoben, Abigail B.			Overall success rate of a safe and efficacious drug: results using six phase I designs, each followed by phase II and III trials using standard designs	TRIALS																														1745-6215					MAY 8	2017	18			1
J	Fiandra, L; Bonfanti, P; Piunno, Y; Nagvenkar, AP; Perlesthein, I; Gedanken, A; Saibene, M; Colombo, A; Mantecca, P				Fiandra, Luisa; Bonfanti, Patrizia; Piunno, Ylenia; Nagvenkar, Anjani P.; Perlesthein, Ilana; Gedanken, Aharon; Saibene, Melissa; Colombo, Anita; Mantecca, Paride			Hazard assessment of polymer-capped CuO and ZnO nanocolloids: A contribution to the safe-by-design implementation of biocidal agents	NANOIMPACT												The antibacterial activity of metal oxide (MeO) nanoparticles (NPs) has been extensively reported. Nevertheless, there is a general concern about MeO NPs toxicity, and much efforts are being devoted to improve a safe employment of these nanomaterials by surface functionalization. In this work, we propose to investigate if the coating of copper and zinc oxides (CuO and ZnO) NPs with the polymers p…																		2452-0748					JAN	2020	17
J	Bouchaut, B; Asveld, L				Bouchaut, Britte; Asveld, Lotte			Safe-by-Design: Stakeholders' Perceptions and Expectations of How to Deal with Uncertain Risks of Emerging Biotechnologies in the Netherlands	RISK ANALYSIS												Advanced gene editing techniques such as Clustered Regularly Interspaced Short Palindromic Repeat (CRISPR)/Cas have increased the pace of developments in the field of industrial biotechnology. Such techniques imply new possibilities when working with living organisms, possibly leading to uncertain risks. In the Netherlands, current policy fails to address these uncertain risks because risk classi…						Asveld, Lotte/0000-0002-2524-7814; Bouchaut, Britte/0000-0002-1375-4675												0272-4332	1539-6924				AUG	2020	40	8
J	Rubio, L; Pyrgiotakis, G; Beltran-Huarac, J; Zhang, YP; Gaurav, J; Deloid, G; Spyrogianni, A; Sarosiek, KA; Bello, D; Demokritou, P				Rubio, Laura; Pyrgiotakis, Georgios; Beltran-Huarac, Juan; Zhang, Yipei; Gaurav, Joshi; Deloid, Glen; Spyrogianni, Anastasia; Sarosiek, Kristopher A.; Bello, Dhimiter; Demokritou, Philip			Safer-by-design flame-sprayed silicon dioxide nanoparticles: the role of silanol content on ROS generation, surface activity and cytotoxicity	PARTICLE AND FIBRE TOXICOLOGY												Background: Amorphous silica nanoparticles (SiO2 NPs) have been regarded as relatively benign nanomaterials, however, this widely held opinion has been questioned in recent years by several reports on in vitro and in vivo toxicity. Surface chemistry, more specifically the surface silanol content, has been identified as an important toxicity modulator for SiO2 NPs. Here, quantitative relationships…					Roveri, Anastasia Spyrogianni/AAA-4139-2019; Lorente, Laura Rubio/AAF-8204-2020	Lorente, Laura Rubio/0000-0002-2088-3803; Sarosiek, Kristopher/0000-0002-4618-5085												1743-8977					OCT 29	2019	16	1
J	Tavernaro, I; Dekkers, S; Soeteman-Hernandez, LG; Herbeck-Engel, P; Noorlander, C; Kraegeloh, A				Tavernaro, Isabella; Dekkers, Susan; Soeteman-Hernandez, Lya G.; Herbeck-Engel, Petra; Noorlander, Cornelle; Kraegeloh, Annette			Safe-by-Design part II: A strategy for balancing safety and functionality in the different stages of the innovation process	NANOIMPACT												Manufactured nanomaterials have the potential to impact an exceedingly wide number of industries and markets ranging from energy storage, electronic and optical devices, light-weight construction to innovative medical approaches for diagnostics and therapy. In order to foster the development of safer nanomaterial-containing products, two main aspects are of major interest: their functional perfor…						Soeteman-Hernandez, Lya G./0000-0003-3529-3694												2452-0748					OCT	2021	24
J	Rose, J; Auffan, M; De Garidel-Thoron, C; Artous, S; Brochard, G; Clavaguera, S; Truffier-Boutry, D; Wortham, H; Masion, A				Rose, Jerome; Auffan, Melanie; De Garidel-Thoron, Camille; Artous, Sebastien; Brochard, Gregory; Clavaguera, Simon; Truffier-Boutry, Delphine; Wortham, Henri; Masion, Armand			The SERENADE project - A step forward in the Safe by Design process of nanomaterials: Moving towards a product-oriented approach	NANO TODAY												Recent research efforts have gone into formalizing and standardizing the Safe by Design process of nanomaterials. This usually results in a structured and (most often) sequential approach deliberately putting the focus on hazard and exposure issues regarding the nanomaterial itself in a bottom-up progression of material development. However, this general strategy lacks flexibility. Within the pro…					ROSE, Jerome/J-5063-2017; Masion, Armand/AAT-1342-2021	ROSE, Jerome/0000-0003-3071-8147; Wortham, Henri/0000-0002-7778-8188; ARTOUS, Sebastien/0000-0001-7581-2714												1748-0132	1878-044X				AUG	2021	39
J	Rabani, I; Lee, SH; Kim, HS; Yoo, J; Hussain, S; Maqbool, T; Seo, YS				Rabani, Iqra; Lee, Song-Hee; Kim, Hyo-Sun; Yoo, Jeseung; Hussain, Sajjad; Maqbool, Tahir; Seo, Young-Soo			Engineering-safer-by design ZnO nanoparticles incorporated cellulose nanofiber hybrid for high UV protection and low photocatalytic activity with mechanism	JOURNAL OF ENVIRONMENTAL CHEMICAL ENGINEERING												Cellulose nanofiber (CNF) is a well-known biocompatible polymer with various versatile characteristics. In recent years, nano-sized materials with high flexibility and biocompatibility that exhibit ultraviolet (UV) blocking properties with maximum dispersion have attracted increasing attention, particularly, materials with photo catalytic activity. In this study, zinc oxide nanoparticle (ZnO NP) …						Seo, Young-Soo/0000-0002-1977-0625												2213-2929	2213-3437				OCT	2021	9	5
J	Weyell, P; Kurland, HD; Hulser, T; Grabow, J; Muller, FA; Kralisch, D				Weyell, P.; Kurland, H-D; Huelser, T.; Grabow, J.; Mueller, F. A.; Kralisch, D.			Risk and life cycle assessment of nanoparticles for medical applications prepared using safe- and benign-by-design gas-phase syntheses	GREEN CHEMISTRY												Laser vaporisation is a promising technology for the industrial manufacturing of spherical, oxidic nanoparticles, including crystalline, less-agglomerated ferromagnetic maghemite (gamma-Fe2O3) and superparamagnetic gamma-Fe2O3/amorphous SiO2 composite nanoparticles. These can be utilised in medical applications such as contrast agents in magnetic resonance imaging (MRI) and may replace common con…																		1463-9262	1463-9270				FEB 7	2020	22	3
J	Pavlicek, A; Part, F; Gressler, S; Rose, G; Gazso, A; Ehmoser, EK; Huber-Humer, M				Pavlicek, Anna; Part, Florian; Gressler, Sabine; Rose, Gloria; Gazso, Andre; Ehmoser, Eva-Kathrin; Huber-Humer, Marion			Testing the Applicability of the Safe-by-Design Concept: A Theoretical Case Study Using Polymer Nanoclay Composites for Coffee Capsules	SUSTAINABILITY												The production and use of engineered nanomaterials and nano-enabled products is increasing, enabling innovations in many application areas, e.g., in the sector of food contact materials. However, nanosafety-relevant information for chemical risk assessment is still scarce, leading to a high level of uncertainty and making the early integration of safety to the innovation process indispensable. Th…					; Ehmoser, Eva-Kathrin/G-9616-2012	Huber-Humer, Marion/0000-0002-8747-377X; Part, Florian/0000-0003-1301-1502; Ehmoser, Eva-Kathrin/0000-0001-9201-268X													2071-1050				DEC	2021	13	24
J	Miao, ZH; Huang, DD; Wang, YC; Li, WJ; Fan, LN; Wang, JG; Ma, Y; Zhao, QL; Zha, ZB				Miao, Zhaohua; Huang, Doudou; Wang, Yichuan; Li, Wei-Jian; Fan, Linxin; Wang, Jingguo; Ma, Yan; Zhao, Qingliang; Zha, Zhengbao			Safe-by-Design Exfoliation of Niobium Diselenide Atomic Crystals as a Theory-Oriented 2D Nanoagent from Anti-Inflammation to Antitumor	ADVANCED FUNCTIONAL MATERIALS												The accompanying relationship between tumor and inflammation raises the concept of concurrent antitumor and anti-inflammation treatment in the clinic. Despite the wide application of 2D atomic crystals for cancer theranostics, their anti-inflammation function has been rarely explored. Herein, it is reported that niobium diselenide nanosheets (NbSe(2)NSs), a star 2D superconducting atomic crystal,…																		1616-301X	1616-3028				OCT	2020	30	40
J	Lynch, I; Weiss, C; Valsami-Jones, E				Lynch, Iseult; Weiss, Carsten; Valsami-Jones, Eugenia			A strategy for grouping of nanomaterials based on key physico-chemical descriptors as a basis for safer-by-design NMs	NANO TODAY												There is an urgent need to establish a fundamental understanding of the mechanisms of nanomaterial (NM) interaction with living systems and the environment, in order for regulation of NMs to keep pace with their increasing industrial application. Identification of critical properties (physicochemical descriptors) that confer the ability to induce harm in biological systems is crucial, enabling bo…					Valsami-Jones, Eva/I-1736-2016; Weiss, Carsten/I-1811-2013; Lynch, Iseult/I-3915-2014	Valsami-Jones, Eva/0000-0002-8850-7556; Weiss, Carsten/0000-0002-5380-3208; Lynch, Iseult/0000-0003-4250-4584												1748-0132	1878-044X				JUN	2014	9	3
J	Nguyen, AM; del Real, AEP; Durupthy, O; Lanone, S; Chaneac, C; Carenco, S				Nguyen, Anh-Minh; Pradas del Real, Ana Elena; Durupthy, Olivier; Lanone, Sophie; Chaneac, Corinne; Carenco, Sophie			Risk Analysis and Technology Assessment of Emerging (Gd,Ce)(2)O2S Multifunctional Nanoparticles: An Attempt for Early Safer-by-Design Approach	NANOMATERIALS												Acceptability and relevance of nanoparticles in the society is greatly improved using a safer-by-design strategy. However, this is difficult to implement when too late in the development process or when nanoparticles are already on the market (e.g., TiO2). We employ this strategy for emerging nanoparticles of lanthanide oxysulfide of formula (Gd,Ce)(2)O2S, relevant for photocatalysis as well as f…																			2079-4991				FEB	2022	12	3
J	Naatz, H; Lin, SJ; Li, RB; Jiang, W; Ji, ZX; Chang, CH; Koser, J; Thoming, J; Xia, T; Nel, AE; Madler, L; Pokhrel, S				Naatz, Hendrik; Lin, Sijie; Li, Ruibin; Jiang, Wen; Ji, Zhaoxia; Chang, Chong Hyun; Koeser, Jan; Thoeming, Jorg; Xia, Tian; Nel, Andre E.; Maedler, Lutz; Pokhrel, Suman			Safe-by-Design CuO Nanoparticles via Fe-Doping, Cu-O Bond Length Variation, and Biological Assessment in Cells and Zebrafish Embryos	ACS NANO												The safe implementation of nanotechnology requires nanomaterial hazard assessment in accordance with the material physicochemical properties that trigger the injury response at the nano/bio interface. Since CuO nanoparticles (NPs) are widely used industrially and their dissolution properties play a major role in hazard potential, we hypothesized that tighter bonding of Cu to Fe by particle doping…					Mädler, Lutz/F-2982-2013; Nel, Andre E/J-2808-2012; Pokhrel, Suman/I-5861-2013; Mädler, Lutz/N-3068-2019; XIA, TIAN/C-3158-2013; Lin, Sijie/S-8428-2016	Mädler, Lutz/0000-0002-7073-0733; Pokhrel, Suman/0000-0001-5712-2824; Mädler, Lutz/0000-0002-7073-0733; XIA, TIAN/0000-0003-0123-1305; Lin, Sijie/0000-0002-6970-8221; Li, Ruibin/0000-0001-6471-7658												1936-0851	1936-086X				JAN	2017	11	1
J	Delfabbro, P; Parke, J; Dragecvic, S; Percy, C; Bayliss, R				Delfabbro, Paul; Parke, Jonathan; Dragecvic, Simo; Percy, Chris; Bayliss, Richard			Safer by design: Building a collaborative, integrated and evidence-based framework to inform the regulation and mitigation of gambling product risk	JOURNAL OF GAMBLING ISSUES												Evidence suggests that harms may result from gambling participation as a result of a complex interaction between individual differences among consumers, environ-mental factors, and the characteristics of the gambling product. The latter of these factors, broadly referred to in this paper as product risk, has received increased policy attention in recent years. Product-focussed approaches to harm …																		1910-7595					SEP	2021		48
J	El-Bayoumi, A				El-Bayoumi, Abdullah			New safe reliable design methodologies examined by fault injection testing and Monte Carlo simulation: tolerating shared-memory interferences in multicore architectures	INTERNATIONAL JOURNAL OF EMBEDDED SYSTEMS												Nowadays, the automotive industry utilises multicore processors to meet autonomous driving requirements. This imposes a higher complexity on the development and the verification of software applications. Compliance to the ISO 26262 safety standard increases this complexity. In this paper, means of shared-memory interferences that affect Automotive Safety Integrity Level (ASIL)-D multicore archite…																		1741-1068	1741-1076					2021	14	4
C	Suprianto, D; Wibowo, DW; Setiawan, A; Agustina, R		Abdullah, AG; Nandiyanto, ABD; Widiaty, I; Danuwijaya, AA; Abdullah, CU		Suprianto, D.; Wibowo, D. W.; Setiawan, A.; Agustina, R.			Integrated application design to facilitate effective and safe student pick-up process by utilizing microcontrollers, socket TCP, and client-server database	4TH ANNUAL APPLIED SCIENCE AND ENGINEERING CONFERENCE, 2019	Journal of Physics Conference Series				4th Annual Applied Science and Engineering Conference (AASEC)	APR 24, 2019	Univ Pendidikan Indonesia, Sch Postgraduate Studies, Tech & Vocat Educ St, Bali, INDONESIA	Univ Pendidikan Indonesia Publicat Ctr, Warmadewa Univ, Univ Islam Negeri Sunan Gunung Djati, Univ Negeri Jakarta, Univ Wijaya Kusuma Surabaya, Inst Pendidikan Indonesia, Sampoerna Univ, Sekolah Tinggi Teknologi Garut, Trisakti Univ, Politeknik Negeri Malang, Univ Muhammadiyah Sidoardjo, Univ Kanjuruhan Malang, Univ Garu, Univ Komputer Indonesia	Univ Pendidikan Indonesia, Sch Postgraduate Studies, Tech & Vocat Educ St			Long queues during student pick-up are a major problem in some elementary schools and kindergartens. Sometimes parents don't find their children in school because they may be buying food, being in class or playing in a large school area, so their parents have to wait for a long time for their children to go out to the gate. Conversely, sometimes parents are late in picking up their children, whic…					Agustina, Rini/AAW-8177-2021; Agustina, Rini/B-7770-2019; Suprianto, Dodit/B-7770-2019	Agustina, Rini/0000-0003-1650-4994; Suprianto, Dodit/0000-0002-5072-5574												1742-6588	1742-6596					2019	1402
J	Toybou, D; Celle, C; Aude-Garcia, C; Rabilloud, T; Simonato, JP				Toybou, Djadidi; Celle, Caroline; Aude-Garcia, Catherine; Rabilloud, Thierry; Simonato, Jean-Pierre			A toxicology-informed, safer by design approach for the fabrication of transparent electrodes based on silver nanowires (vol 6, pg 684, 2019)	ENVIRONMENTAL SCIENCE-NANO																	SIMONATO, jean-pierre/AAA-5250-2021	CELLE, Caroline/0000-0001-6652-5326												2051-8153	2051-8161				FEB 1	2019	6	2
J	Rose, J; Auffan, M; de Garidel-Thoron, C; Artous, S; Auplat, C; Brochard, G; Capron, I; Carriere, M; Cathala, B; Charlet, L; Clavaguera, S; Heulin, T; Labille, J; Orsiere, T; Peyron, S; Rabilloud, T; Santaella, C; Truffier-Boutry, D; Wortham, H; Masion, A				Rose, Jerome; Auffan, Melanie; de Garidel-Thoron, Camille; Artous, Sebastien; Auplat, Claire; Brochard, Gregory; Capron, Isabelle; Carriere, Marie; Cathala, Bernard; Charlet, Laurent; Clavaguera, Simon; Heulin, Thierry; Labille, Jerome; Orsiere, Thierry; Peyron, Stephane; Rabilloud, Thierry; Santaella, Catherine; Truffier-Boutry, Delphine; Wortham, Henri; Masion, Armand			The SERENADE project; a step forward in the safe by design process of nanomaterials: The benefits of a diverse and interdisciplinary approach	NANO TODAY												Developing safe nanomaterials has become a major concern in all the industry sectors using advanced materials. However, there are very few initiatives addressing this issue. The SERENADE project, with its long-term funding scheme, provided a unique opportunity to foster a coordinated, yet diverse approach to investigate the safe-by-design development of nanomaterials in a variety of application f…					ROSE, Jerome/J-5063-2017; Masion, Armand/AAT-1342-2021; SANTAELLA, Catherine/J-7967-2016	ROSE, Jerome/0000-0003-3071-8147; SANTAELLA, Catherine/0000-0003-3878-2733; Cathala, Bernard/0000-0002-3844-872X												1748-0132	1878-044X				APR	2021	37
J	Tedesco, E; Micetic, I; Ciappellano, SG; Micheletti, C; Venturini, M; Benetti, F				Tedesco, Erik; Micetic, Ivan; Ciappellano, Silvia Gabriella; Micheletti, Christian; Venturini, Marco; Benetti, Federico			Cytotoxicity and antibacterial activity of a new generation of nanoparticle-based consolidants for restoration and contribution to the safe-by-design implementation	TOXICOLOGY IN VITRO												Works of art are constantly under physical, chemical and biological degradation, so constant restoration is required. Consolidation is an important step in restoration, and traditional approaches and materials have already shown their limitations. To solve these problems, new nanoparticle-based consolidants were developed. No information on their toxicity is yet available. In this work, we focuse…					Mičetić, Ivan/A-7146-2015	Mičetić, Ivan/0000-0003-1691-8425; Benetti, Federico/0000-0001-6491-4715												0887-2333					OCT	2015	29	7
J	Lee, Y; Kim, H; Yim, T; Lee, KY; Choi, W				Lee, Yongho; Kim, Hyeongwoo; Yim, Taeeun; Lee, Kwan-Young; Choi, Wonchang			Compositional core-shell design by nickel leaching on the surface of Ni-rich cathode materials for advanced high-energy and safe rechargeable batteries	JOURNAL OF POWER SOURCES												Ni-rich layered oxides are promising cathode candidates for Li-ion batteries because of their high discharge capacity, high energy density, and low cost. However, poor cycling stability and thermal instability during cycling limit their commercial application in electric vehicles. To overcome these drawbacks, Ni-rich transition metal hydroxide precursors comprising a Ni-rich core and Ni-less surf…					choi, wonchang/AAR-6726-2020; Lee, Kwan-Young/F-7603-2013	Yim, Taeeun/0000-0002-7057-9308; choi, wonchang/0000-0002-8463-1517; Kim, Hyeongwoo/0000-0002-9563-8546												0378-7753	1873-2755				OCT 1	2018	400
J	Chatterjee, N; Yang, J; Atluri, R; Lee, W; Hong, J; Choi, J				Chatterjee, Nivedita; Yang, Jisu; Atluri, Rambabu; Lee, Wonwoong; Hong, Jongki; Choi, Jinhee			Amorphous silica nanoparticle-induced perturbation of cholesterol homeostasis as a function of surface area highlights safe-by-design implementation: an integrated multi-OMICS analysis	RSC ADVANCES												To close the knowledge gap between the wide application of amorphous silica nanoparticles (aSiNPs) and their health impact, the present study endeavored to investigate the molecular mechanisms involved in aSiNPs-mediated hepatotoxicity with a systems toxicology approach and how it is related to the physico-chemical properties of aSiNPs. To this end, we used four types of aSiNPs with different sur…					Chatterjee, Nivedita/AAQ-1320-2021; Chatterjee, Nivedita/AFR-7277-2022	Chatterjee, Nivedita/0000-0002-6080-4495													2046-2069					2016	6	73
J	Hadrup, N; Knudsen, KB; Carriere, M; Mayne-L'Hermite, M; Bobyk, L; Allard, S; Miserque, F; Pibaleau, B; Pinault, M; Wallin, H; Vogel, U				Hadrup, Niels; Knudsen, Kristina Bram; Carriere, Marie; Mayne-L'Hermite, Martine; Bobyk, Laure; Allard, Soline; Miserque, Frederic; Pibaleau, Baptiste; Pinault, Mathieu; Wallin, Hakan; Vogel, Ulla			Safe-by-design strategies for lowering the genotoxicity and pulmonary inflammation of multiwalled carbon nanotubes: Reduction of length and the introduction of COOH groups	ENVIRONMENTAL TOXICOLOGY AND PHARMACOLOGY												Potentially, the toxicity of multiwalled carbon nanotubes (MWCNTs) can be reduced in a safe-by-design strategy. We investigated if genotoxicity and pulmonary inflammation of MWCNTs from the same batch were lowered by a) reducing length and b) introducing COOH-groups into the structure. Mice were administered: 1) long and pristine MWCNT (CNT-long) (3.9 mu m); 2) short and pristine CNT (CNT-short) …						Hadrup, Niels/0000-0002-1188-445X												1382-6689	1872-7077				OCT	2021	87
J	Ryan, C; Ali, A; Sabourin, H				Ryan, Chaneesa; Ali, Abrar; Sabourin, Hollie			A Culturally Safe and Trauma-Informed Sexually Transmitted Blood Borne Infection (STBBI) Intervention Designed by and for Incarcerated Indigenous Women and Gender-Diverse People	INTERNATIONAL JOURNAL OF INDIGENOUS HEALTH												Indigenous women are grossly overrepresented both within the federal correctional system and among Sexually Transmitted Blood Borne Infection (STBBI) diagnoses in Canada. Mainstream approaches continue to fall short in addressing Human Immunodeficiency Virus, Hepatitis C an other STBBIs within this population. In this paper, we argue that, in order to be successful, STBBI programs and services mu…																		2291-9368	2291-9376				NOV	2020	15	1
C	de Ipina, JML; Hernan, A; Cenigaonaindia, X; Insunza, M; Florez, S; Seddon, R; Vavouliotis, A; Kostopoulos, V; Latko, P; Duralek, P; Kchit, N			IOP	Lopez de Ipina, Jesus M.; Hernan, Angel; Cenigaonaindia, Xabier; Insunza, Mario; Florez, Sonia; Seddon, Richard; Vavouliotis, Antonios; Kostopoulos, Vasilios; Latko, Paulina; Duralek, Pawel; Kchit, Nadir			Implementation of a safe-by-design approach in the development of new open pilot lines for the manufacture of carbon nanotube-based nano-enabled products	5TH NANOSAFE INTERNATIONAL CONFERENCE ON HEALTH AND SAFETY ISSUES RELATED TO NANOMATERIALS FOR A SOCIALLY RESPONSIBLE APPROACH (NANOSAFE 2016)	Journal of Physics Conference Series				5th Nanosafe International Conference on Health and Safety Issues Related to Nanomaterials for a Socially Responsible Approach (NANOSAFE)	NOV 07-10, 2016	Grenoble, FRANCE					The project PLATFORM (H2020, GA 646307) aims to develop three new pilot lines (PPLs) for the manufacture of carbon nanotube-based nano-enabled products (buckypapers, treated prepregs, doped veils), for the European aeronautics and automotive industries (a Technology Readiness Level 6 - TRL6 -is expected at the end of the project). The Machinery Directive 2006/42/EC (MD) - transposed into the resp…					Kostopoulos, Vassilis/ABI-6071-2020; Seddon, Richard/A-4076-2015	Seddon, Richard/0000-0001-6734-464X; Duralek, Pawel/0000-0002-3926-9977; Latko-Duralek, Paulina/0000-0002-1568-5431; Vavouliotis, Antonios/0000-0001-6051-6883												1742-6588	1742-6596					2017	838
J	Hamana, A; Takahashi, Y; Tanioka, A; Nishikawa, M; Takakura, Y				Hamana, Atsushi; Takahashi, Yuki; Tanioka, Akane; Nishikawa, Makiya; Takakura, Yoshinobu			Safe and effective interferon-beta gene therapy for the treatment of multiple sclerosis by regulating biological activity through the design of interferon-beta-galectin-9 fusion proteins	INTERNATIONAL JOURNAL OF PHARMACEUTICS												Multiple sclerosis (MS) is the most common demyelinating disease. Despite the historical use of interferon-beta (IFN-beta) for the treatment of patients with MS, concerns exist regarding the side effects of IFN-beta. In this study, we designed a series of novel IFN-beta fusion proteins containing galectin-9 (gal-9), which exerts immunosuppressive effects through the binding to its receptor on act…					Song, Eun Joo/Z-5130-2019	Takahashi, Yuki/0000-0002-8772-2772												0378-5173	1873-3476				JAN 30	2018	536	1
J	Knutson, D; Li, GG; Prevot, T; Arnold, L; Chiou, LC; Ernst, M; Mihovilovic, M; Savic, M; Sieghart, W; Sibille, E; Cook, J				Knutson, Daniel; Li, Guanguan; Prevot, Thomas; Arnold, Leggy; Chiou, Lih-Chu; Ernst, Margot; Mihovilovic, Marko; Savic, Miroslav; Sieghart, Werner; Sibille, Etienne; Cook, James			Combatting the opioid and benzodiazepine epidemic by the synthesis of novel safer drugs designed to be functionally selective for alpha 5-or alpha 6-containing GABAA receptors	ABSTRACTS OF PAPERS OF THE AMERICAN CHEMICAL SOCIETY					Fall National Meeting and Exposition of the American-Chemical-Society (ACS)	AUG 25-29, 2019	San Diego, CA	Amer Chem Soc																						0065-7727					AUG 25	2019	258
J	Thanki, K; Zeng, XH; Justesen, S; Tejlmann, S; Falkenberg, E; Van Driessche, E; Nielsen, HM; Franzyk, H; Foged, C				Thanki, Kaushik; Zeng, Xianghui; Justesen, Sarah; Tejlmann, Sarah; Falkenberg, Emily; Van Driessche, Elize; Nielsen, Hanne Morck; Franzyk, Henrik; Foged, Camilla			Engineering of small interfering RNA-loaded lipidoid-poly(DL-lactic-co-glycolic acid) hybrid nanoparticles for highly efficient and safe gene silencing: A quality by design-based approach	EUROPEAN JOURNAL OF PHARMACEUTICS AND BIOPHARMACEUTICS												Safety and efficacy of therapeutics based on RNA interference, e.g., small interfering RNA (siRNA), are dependent on the optimal engineering of the delivery technology, which is used for intracellular delivery of siRNA to the cytosol of target cells. We investigated the hypothesis that commonly used and poorly tolerated cationic lipids might be replaced with more efficacious and safe lipidoids as…					Zeng, Xianghui/H-5395-2012; Nielsen, Hanne M/L-9481-2015; Thanki, Kaushik/A-5378-2012	Zeng, Xianghui/0000-0001-7586-1751; Nielsen, Hanne M/0000-0002-7285-9100; Foged, Camilla/0000-0003-2812-5588; Thanki, Kaushik/0000-0003-0823-7160; Franzyk, Henrik/0000-0002-2822-1927												0939-6411	1873-3441				NOV	2017	120
[truncated: 19 more columns]

## Sheet: 3. First screening
Authors	Title	Journal, Volume, Issue	year	Abstract	DOI	Pre-screening
								Exclusion criteria
						Relevant	editorial	focus ton toxicity or case study only	focus on procedural etc	safety of operations etc	other
Akdas, T; Reiss, P	Safer-by-design synthesis of quantum dots in flow reactors	6TH NANOSAFE INTERNATIONAL CONFERENCE (1323)	2019	After decades of research and commercialization efforts, colloidal semiconductor nanocrystals (quantum dots, QDs) are now on the verge of widespread application. Given the high demands of industrial production processes regarding process safety, cost efficiency and reproducibility of high quality products with high yield, continuous processes in flow reactors offer several advantages over the sca…	10.1088/1742-6596/1323/1/012007			X
Alavi, SR; Rahmati, M; Ziaei-Rad, S	A new approach to design safe-supported HDD against random excitation by using optimization of rubbers spatial parameters	MICROSYSTEM TECHNOLOGIES-MICRO-AND NANOSYSTEMS-INFORMATION STORAGE AND PROCESSING SYSTEMS (23)6	2017	Hard disk drives (HDDs) of laptop personal computers (LPCs) are devices vulnerable in harsh mechanical environments. Hence, they need to be protected against damages due to vibration in order to have better read/write performance. In the present study, a LPC and its HDD are modeled as a system with two degrees of freedom and the nonlinear optimization method is employed to perform a passive contr…	10.1007/s00542-016-2944-x			X		X
Alberto, R; Peixoto, M; Farinha, M; Cabral, A; Estrela, M; Silva, E; Rato, R	SAFE-BY-DESIGN IMPLEMENTATION APPROACH IN PRODUCTION SYSTEMS - CASE STUDY, PROTECTIVE COMPOSITE COATINGS BASED IN NANO PARTICLES	PROCEEDINGS OF THE 7TH INTERNATIONAL CONFERENCE ON MECHANICS AND MATERIALS IN DESIGN (M2D2017) ()	2017	Nanotechnology focuses primarily on the characterization, manipulation, manufacture and application of materials with extremely small dimensions, in a nanoscale. The unique properties of engineered nanomaterials are an unquestionable advantage for technological applications. However, there is a need to proceed responsibly because published toxicological studies demonstrate that some nanomaterials…				X
Aldakov, D; Reiss, P	Safer-by-Design Fluorescent Nanocrystals: Metal Halide Perovskites vs Semiconductor Quantum Dots	JOURNAL OF PHYSICAL CHEMISTRY C (123)20	2019	Despite the young age of the research field, substantial progress has been made in the study of metal halide perovskite nanocrystals (HPNCs). Just as their thin-film counterparts are used for light absorption in solar cells, they are on the way to revolutionizing research on novel chromophores for light emission applications. Exciting physics arising from their peculiar structural, electronic, an…	10.1021/acs.jpcc.8b12228			X
Anastas, PT; Zimmerman, JB	Safer by Design	GREEN CHEMISTRY (18)16	2016		10.1039/c6gc90074g						X	This is a short editorial to a special issue on Safer by Design
Azmi, IDM; Wibroe, PP; Wu, LP; Kazem, AI; Amenitsch, H; Moghimi, SM; Yaghmur, A	A structurally diverse library of safe-by-design citrem-phospholipid lamellar and non-lamellar liquid crystalline nano-assemblies	JOURNAL OF CONTROLLED RELEASE (239)	2016	Non-lamellar liquid crystalline aqueous nanodispersions, known also as ISAsomes (internally self-assembled 'somes' or nanoparticles), are gaining increasing interest in drug solubilisation and bio-imaging, but they often exhibit poor hemocompatibility and induce cytotoxicity. This limits their applications in intravenous drug delivery and targeting. Using a binary mixture of citrem and soy phosph…	10.1016/j.jconrel.2016.08.011			X
Bae, SY; Lee, SY; Kim, JW; Umh, HN; Jeong, J; Bae, S; Yi, J; Kim, Y; Choi, J	Hazard potential of perovskite solar cell technology for potential implementation of safe-by-design approach	SCIENTIFIC REPORTS (9)	2019	The perovskite solar cell (PSC) is a rapidly advancing solar technology with high efficiencies and low production costs. However, as the PSC contains methylammonium lead iodide (CH3NH3PbI3, MAPbI(3)) in the light-harvesting active layer, addressing the safety issue of PSCs is an important prerequisite for its commercialization. In this study, the potential hazards of the PSC were investigated wit…	10.1038/s41598-018-37229-8			X
Bastus, NG; Puntes, V	Nanosafety: Towards Safer Nanoparticles by Design	CURRENT MEDICINAL CHEMISTRY (25)35	2018	Background: Nanosafety aims for a solution through the safer design (and re-design) of nanostructured materials, optimizing both performance and safety, by resolving which structural features lead to the desired properties and modifying them to avoid their detrimental effects without losing their desired nanoscale properties in the process. Starting with known toxic NPs, the final aim should be t…	10.2174/0929867324666170413124915	X
Borges, T; Silva, MJ; Louro, H	Moving towards a safe by design approach for ENM: Linking ENM relevant properties to toxicological concerns	TOXICOLOGY LETTERS (238)2	2015		10.1016/j.toxlet.2015.08.095	X
Bottero, JY; Rose, J; de Garidel, C; Masion, A; Deutsch, T; Brochard, G; Carriere, M; Gontard, N; Wortham, H; Rabilloud, T; Salles, B; Dubosson, M; Cathala, B; Boutry, D; Ereskovsky, A; Auplat, C; Charlet, L; Heulin, T; Frejafon, E; Lanone, S	SERENADE: safer and ecodesign research and education applied to nanomaterial development, the new generation of materials safer by design	ENVIRONMENTAL SCIENCE-NANO (4)3	2017	SERENADE is a French project which aims to develop and apply the safer by design process to create safer nano-products. It achieves this goal by combining knowledge and scientific approaches from a range of disciplines towards this common goal. This tutorial review presents the conceptual approach to Safer by Design and provides several examples of case studies primarily for TiO2 (anatase) presen…	10.1039/c6en00282j	X
Bouchaut, B; Asveld, L	Safe-by-Design: Stakeholders' Perceptions and Expectations of How to Deal with Uncertain Risks of Emerging Biotechnologies in the Netherlands	RISK ANALYSIS (40)8	2020	Advanced gene editing techniques such as Clustered Regularly Interspaced Short Palindromic Repeat (CRISPR)/Cas have increased the pace of developments in the field of industrial biotechnology. Such techniques imply new possibilities when working with living organisms, possibly leading to uncertain risks. In the Netherlands, current policy fails to address these uncertain risks because risk classi…	10.1111/risa.13501				X			This study is more focusing on an ethical value discussion of IPS versus SbD: "Although both the Inherent Safety Principles (ISPs) and the Safe-by-Design (SbD) approach revolve around the central value of safety".
Bouchaut, B; Asveld, L; Hanefeld, U; Vlierboom, A	Value Conflicts in Designing for Safety: Distinguishing Applications of Safe-by-Design and the Inherent Safety Principles	INTERNATIONAL JOURNAL OF ENVIRONMENTAL RESEARCH AND PUBLIC HEALTH (18)4	2021	Although both the Inherent Safety Principles (ISPs) and the Safe-by-Design (SbD) approach revolve around the central value of safety, they have a slightly different focus in terms of developing add-on features or considering initial design choices. This paper examines the differences between these approaches and analyses which approach is more suitable for a specific type of research-fundamental …	10.3390/ijerph18041963				X			This study is more focusing on an ethical value discussion of IPS versus SbD: "Although both the Inherent Safety Principles (ISPs) and the Safe-by-Design (SbD) approach revolve around the central value of safety".
Boulanger, P; Belkadi, L; Descarpentries, J; Porterat, D; Hibert, E; Brouzes, A; Mille, M; Patel, S; Pinault, M; Reynaud, C; Mayne-L'Hermite, M; Decamps, JM	Towards large scale aligned carbon nanotube composites: an industrial safe-by-design and sustainable approach	NANOSAFE 2012: INTERNATIONAL CONFERENCES ON SAFE PRODUCTION AND USE OF NANOMATERIALS (429)	2013	We present the main results demonstrating the feasibility of high surface (> A4 format size) semi-industrial fabrication of composites embedding VACNT in organic matrices. The process of growing VACNT exhibits several advantages regarding safety issues: integrating de facto a safe collecting procedure on the substrate, avoiding additional preparation steps and simplifying handling and protection …	10.1088/1742-6596/429/1/012050						X	This is a very weird article. It has safe-by-design and sustainability in the title and also in the title of one of its sections, but nowhere else in the entire manuscript these terms are used or explained. Therefore not relevant.
Brehm, M; Kafka, A; Bamler, M; Kuhne, R; Schuurmann, G; Sikk, L; Burk, J; Burk, P; Tamm, T; Tamm, K; Pokhrel, S; Madler, L; Kahru, A; Aruoja, V; Sihtmae, M; Scott-Fordsmand, J; Sorensen, PB; Escorihuela, L; Roca, CP; Fernandez, A; Giralt, F; Rallo, R	An Integrated Data-Driven Strategy for Safe-by-Design Nanoparticles: The FP7 MODERN Project	MODELLING THE TOXICITY OF NANOPARTICLES (947)	2017	The development and implementation of safe-by-design strategies is key for the safe development of future generations of nanotechnology enabled products. The safety testing of the huge variety of nanomaterials that can be synthetized is unfeasible due to time and cost constraints. Computational modeling facilitates the implementation of alternative testing strategies in a time and cost effective …	10.1007/978-3-319-47754-1_9					X
Brennan, ME; Valsami-Jones, E	Safe by Design for Nanomaterials-Late Lessons from Early Warnings for Sustainable Innovation	NANOETHICS (15)2	2021	The Safe by Design conceptual initiative being developed for nanomaterials offers a template for a new sustainable innovation approach for advanced materials with four important sustainability characteristics. Firstly, it requires potential toxicity risks to be evaluated earlier in the innovation cycle simultaneously with its chemical functionality and possible commercial applications. Secondly, …	10.1007/s11569-021-00393-9		X		X			This is commentary on the procedural, ethical, legislative and stakeholder aspects of SbD, without defining it, mixing up terms as SbD, safe and sustainable etc.
Burgum, MJ; Vogel, U; Clift, MJD; Doak, SH	Nanofibre inhalation toxicology: providing the foundations for safe-by-design in-silico models	TOXICOLOGY LETTERS (350)	2021					X
Caldeira, C. Farcal, L., Tosches D., Amelio, A., Rasmussen, K., Rauscher, H., Riego Sintes, J., Sala, S.	Framework for the definition of criteria and evaluation procedure for chemicals and materials - Draft Report for consultation	JRC Report D3 for SbD EU network	2022	Within the European Green Deal, the Chemicals Strategy for Sustainability (CSS) (EC, 2020a) identified a number of intervention to reduce impacts on human health and the environment associated with chemicals, materials, products and services commercialised or introduced in the EU market. In particular, the ambition of the CSS is to phase out the most harmful (not only SVHCs) substances and substi…		X						added through snowballing
Catalano, R; Slomberg, DL; Picard, C; Hucher, N; Vidal, V; Saint-Antonin, F; Hubaud, JC; Rose, J; Labille, J	In situ determination of engineered nanomaterial aggregation state in a cosmetic emulsion - toward safer-by-design products	ENVIRONMENTAL SCIENCE-NANO (8)12	2021	Engineered nanomaterials (ENMs) can be used in cosmetics as UV blockers. For these products, the exposure-driven risk for humans and the environment is related to the ENM release during or after use, and thus to the original surface properties and aggregation state of the ENMs. Moreover, as the ENM dispersion in the product also affects the efficiency to screen UV rays, optimizing the formulation…	10.1039/d1en00345c			X
Chang, Y; Li, K; Feng, YL; Liu, N; Cheng, Y; Sun, XJ; Feng, YQ; Li, X; Wu, ZJ; Zhang, HY	Crystallographic facet-dependent stress responses by polyhedral lead sulfide nanocrystals and the potential safe-by-design approach	NANO RESEARCH (9)12	2016	The particular physicochemical properties of nanomaterials are able to elicit unique biological responses. The property activity relationship is usually established for in-depth understanding of toxicity mechanisms and designing safer nanomaterials. In this study, the toxic role of specific crystallographic facets of a series of polyhedral lead sulfide (PbS) nanocrystals, including truncated octa…	10.1007/s12274-016-1251-2			X
Chatterjee, N; Yang, J; Atluri, R; Lee, W; Hong, J; Choi, J	Amorphous silica nanoparticle-induced perturbation of cholesterol homeostasis as a function of surface area highlights safe-by-design implementation: an integrated multi-OMICS analysis	RSC ADVANCES (6)73	2016	To close the knowledge gap between the wide application of amorphous silica nanoparticles (aSiNPs) and their health impact, the present study endeavored to investigate the molecular mechanisms involved in aSiNPs-mediated hepatotoxicity with a systems toxicology approach and how it is related to the physico-chemical properties of aSiNPs. To this end, we used four types of aSiNPs with different sur…	10.1039/c6ra06006d			X		X
Cobaleda-Siles, M; Guillamon, AP; Delpivo, C; Vazquez-Campos, S; Puntes, VF	Safer by design strategies	5TH NANOSAFE INTERNATIONAL CONFERENCE ON HEALTH AND SAFETY ISSUES RELATED TO NANOMATERIALS FOR A SOCIALLY RESPONSIBLE APPROACH (NANOSAFE 2016) (838)	2017	Throughout the EU funded FP7 project GUIDENano, we are trying to control and monitor the evolution of nano-enable products during their lifecycle. Small alterations of the nanoparticle (NP) state may have critical consequences on the NP behaviour and performance. For this reason it is important to highlight the importance of an extensive and proper characterization to define the NP physico-chemic…	10.1088/1742-6596/838/1/012016	X
Colaco, M; Marques, AP; Jesus, S; Duarte, A; Borges, O	Safe-by-Design of Glucan Nanoparticles: Size Matters When Assessing the Immunotoxicity	CHEMICAL RESEARCH IN TOXICOLOGY (33)4	2020	Glucan (from Alcaligenes faecalis) is a polymer composed of beta-1,3-linked glucose residues, and it has been addressed in different medical fields, namely in nanotechnology, as a vaccine or a drug delivery system. However, due to their small size, nanomaterials may present new risks and uncertainties. Thus, this work aims to describe the production of glucan nanoparticles (NPs) with two differen…	10.1021/acs.chemrestox.9b00467			X		X
Damasco, JA; Ravi, S; Perez, JD; Hagaman, DE; Melancon, MP	Understanding Nanoparticle Toxicity to Direct a Safe-by-Design Approach in Cancer Nanomedicine	NANOMATERIALS (10)11	2020	Nanomedicine is a rapidly growing field that uses nanomaterials for the diagnosis, treatment and prevention of various diseases, including cancer. Various biocompatible nanoplatforms with diversified capabilities for tumor targeting, imaging, and therapy have materialized to yield individualized therapy. However, due to their unique properties brought about by their small size, safety concerns ha…	10.3390/nano10112186			X		X
de Ipina, JML; Hernan, A; Cenigaonaindia, X; Insunza, M; Florez, S; Seddon, R; Vavouliotis, A; Kostopoulos, V; Latko, P; Duralek, P; Kchit, N	Implementation of a safe-by-design approach in the development of new open pilot lines for the manufacture of carbon nanotube-based nano-enabled products	5TH NANOSAFE INTERNATIONAL CONFERENCE ON HEALTH AND SAFETY ISSUES RELATED TO NANOMATERIALS FOR A SOCIALLY RESPONSIBLE APPROACH (NANOSAFE 2016) (838)	2017	The project PLATFORM (H2020, GA 646307) aims to develop three new pilot lines (PPLs) for the manufacture of carbon nanotube-based nano-enabled products (buckypapers, treated prepregs, doped veils), for the European aeronautics and automotive industries (a Technology Readiness Level 6 - TRL6 -is expected at the end of the project). The Machinery Directive 2006/42/EC (MD) - transposed into the resp…	10.1088/1742-6596/838/1/012018					X
Dekkers, S; Wijnhoven, SWP; Braakhuis, HM; Soeteman-Hernandez, LG; Sips, AJAM; Tavernaro, I; Kraegeloh, A; Noorlander, CW	Safe-by-Design part I: Proposal for nanospecific human health safety aspects needed along the innovation process	NANOIMPACT (18)	2020	Safe-by-Design aims to reduce uncertainties and/or increase the human health and environmental safety from already early in the innovation process onwards and will thereby contribute to increased innovation efficiency, economic viability, interdisciplinary collaboration, consumers trust and improve sustainability. Since most innovators or designers are neither toxicologists nor risk assessors, co…	10.1016/j.impact.2020.100227	X
Delfabbro, P; Parke, J; Dragecvic, S; Percy, C; Bayliss, R	Safer by design: Building a collaborative, integrated and evidence-based framework to inform the regulation and mitigation of gambling product risk	JOURNAL OF GAMBLING ISSUES ()48	2021	Evidence suggests that harms may result from gambling participation as a result of a complex interaction between individual differences among consumers, environ-mental factors, and the characteristics of the gambling product. The latter of these factors, broadly referred to in this paper as product risk, has received increased policy attention in recent years. Product-focussed approaches to harm …	10.4309/jgi.2021.48.8						X	not relevant, is about "gambling" :-)
El-Bayoumi, A	New safe reliable design methodologies examined by fault injection testing and Monte Carlo simulation: tolerating shared-memory interferences in multicore architectures	INTERNATIONAL JOURNAL OF EMBEDDED SYSTEMS (14)4	2021	Nowadays, the automotive industry utilises multicore processors to meet autonomous driving requirements. This imposes a higher complexity on the development and the verification of software applications. Compliance to the ISO 26262 safety standard increases this complexity. In this paper, means of shared-memory interferences that affect Automotive Safety Integrity Level (ASIL)-D multicore archite…	10.1504/IJES.2021.117956					X
Hauschild, MZ; McKone, TE; Arnbjerg-Nielsen, K; Hald, T; Nielsen, BF; Mabit, SE; Fantke, P	Risk and sustainability: trade-offs and synergies for robust decision making	Environmental Sciences Europe (34)11	2022	Decisions about the development of new marketed technologies or products invariably come with consequences for economy, society and the environment. Environmental and health risk assessment on the one hand and sustainability assessment on the other hand are tools that offer different but complementary information about such consequences. Conflicts or synergies between the two tools may arise when…		X						added through snowballing
Fiandra, L; Bonfanti, P; Piunno, Y; Nagvenkar, AP; Perlesthein, I; Gedanken, A; Saibene, M; Colombo, A; Mantecca, P	Hazard assessment of polymer-capped CuO and ZnO nanocolloids: A contribution to the safe-by-design implementation of biocidal agents	NANOIMPACT (17)	2020	The antibacterial activity of metal oxide (MeO) nanoparticles (NPs) has been extensively reported. Nevertheless, there is a general concern about MeO NPs toxicity, and much efforts are being devoted to improve a safe employment of these nanomaterials by surface functionalization. In this work, we propose to investigate if the coating of copper and zinc oxides (CuO and ZnO) NPs with the polymers p…	10.1016/j.impact.2019.100195			X
Floris, P; Garbujo, S; Rolla, G; Giustra, M; Salvioni, L; Catelani, T; Colombo, M; Mantecca, P; Fiandra, L	The Role of Polymeric Coatings for a Safe-by-Design Development of Biomedical Gold Nanoparticles Assessed in Zebrafish Embryo	NANOMATERIALS (11)4	2021	In the biomedical field, gold nanoparticles (GNPs) have attracted the attention of the scientific community thanks to their high potential in both diagnostic and therapeutic applications. The extensive use of GNPs led researchers to investigate their toxicity, identifying stability, size, shape, and surface charge as key properties determining their impact on biological systems, with possible str…	10.3390/nano11041004			X
Fulop, T; Kozma, GT; Vashegyi, I; Meszaros, T; Rosivall, L; Urbanics, R; Storm, G; Metselaar, JM; Szebeni, J	Liposome-induced hypersensitivity reactions: Risk reduction by design of safe infusion protocols in pigs	JOURNAL OF CONTROLLED RELEASE (309)	2019	Intravenous administration of liposomal drugs can entail infusion reactions, also known as hypersensitivity reactions (HSRs), that can be severe and sometimes life-threatening in a small portion of patients. One empirical approach to prevent these reactions consists of lowering the infusion speed and extending the infusion time of the drug. However, different liposomal drugs have different levels…	10.1016/j.jconrel.2019.07.005					X
Furxhi, I; Perucca, M; Blosi, M; de Ipina, JL; Oliveira, J; Murphy, F; Costa, AL	ASINA Project: Towards a Methodological Data-Driven Sustainable and Safe-by-Design Approach for the Development of Nanomaterials	FRONTIERS IN BIOENGINEERING AND BIOTECHNOLOGY (9)	2022	The novel chemical strategy for sustainability calls for a Sustainable and Safe-by-Design (SSbD) holistic approach to achieve protection of public health and the environment, industrial relevance, societal empowerment, and regulatory preparedness. Based on it, the ASINA project expands a data-driven Management Methodology (ASINA-SMM) capturing quality, safety, and sustainability criteria across t…	10.3389/fbioe.2021.805096	X
Gautam, M; Park, DH; Park, SJ; Nam, KS; Park, GY; Hwang, J; Yong, CS; Kim, JO; Byeon, JH	Plug-In Safe-by-Design Nanoinorganic Antibacterials	ACS NANO (13)11	2019	Due to antimicrobial resistance and the adverse health effects that follow broad and inappropriate use of antibacterial agents, new classes of antibacterials with broad and strong bactericidal activity and safety for human use are urgently required globally, increasingly so with the onset of climate change. However, R&D in this field is known to be rarely profitable, unless a cost-effective, flex…	10.1021/acsnano.9b04939			X		X
Gradwell, B	ARC FLASH\BLAST, SAFE BY DESIGN A SAFETY INTEGRITY LEVEL APPROACH (SIL)	2017 IEEE IAS ELECTRICAL SAFETY WORKSHOP (ESW) ()	2017	This paper illustrates the application of a Safe by Design approach developed by the process industries to determine the effectiveness of arc flash\blast risk control techniques using functional safety techniques used to determine the integrity of emergency shutdown systems. It is proposed that with the adoption of risk analysis practices detailed in NFPA70E-2015 Informative Annex F Risk Assessme…						X
Gulumian, M; Andraos, C; Afantitis, A; Puzyn, T; Coville, NJ	Importance of Surface Topography in Both Biological Activity and Catalysis of Nanomaterials: Can Catalysis by Design Guide Safe by Design?	INTERNATIONAL JOURNAL OF MOLECULAR SCIENCES (22)15	2021	It is acknowledged that the physicochemical properties of nanomaterials (NMs) have an impact on their toxicity and, eventually, their pathogenicity. These properties may include the NMs' surface chemical composition, size, shape, surface charge, surface area, and surface coating with ligands (which can carry different functional groups as well as proteins). Nanotopography, defined as the specific…	10.3390/ijms22158347			X
Gulumian, M; Cassee, FR	Safe by design (SbD) and nanotechnology: a much-discussed topic with a prudence?	PARTICLE AND FIBRE TOXICOLOGY (18)1	2021	Safe-by-Design (SbD) has been put forward as a concept to assure that only safe nanomaterials will reach the market and that safety aspects have already been considered in a very early stage of the innovation process. In practice, several laboratory test have been proposed to screen newly developed nanomaterials and nano-enabled products to assess their hazardous nature. These tests need to have …	10.1186/s12989-021-00423-0		X
Guo, ZL; Chakraborty, S; Monikh, FA; Varsou, DD; Chetwynd, AJ; Afantitis, A; Lynch, I; Zhang, P	Surface Functionalization of Graphene-Based Materials: Biological Behavior, Toxicology, and Safe-By-Design Aspects	ADVANCED BIOLOGY (5)9	2021	The increasing exploitation of graphene-based materials (GBMs) is driven by their unique properties and structures, which ignite the imagination of scientists and engineers. At the same time, the very properties that make them so useful for applications lead to growing concerns regarding their potential impacts on human health and the environment. Since GBMs are inert to reaction, various attempt…	10.1002/adbi.202100637			X
Hadrup, N; Knudsen, KB; Carriere, M; Mayne-L'Hermite, M; Bobyk, L; Allard, S; Miserque, F; Pibaleau, B; Pinault, M; Wallin, H; Vogel, U	Safe-by-design strategies for lowering the genotoxicity and pulmonary inflammation of multiwalled carbon nanotubes: Reduction of length and the introduction of COOH groups	ENVIRONMENTAL TOXICOLOGY AND PHARMACOLOGY (87)	2021	Potentially, the toxicity of multiwalled carbon nanotubes (MWCNTs) can be reduced in a safe-by-design strategy. We investigated if genotoxicity and pulmonary inflammation of MWCNTs from the same batch were lowered by a) reducing length and b) introducing COOH-groups into the structure. Mice were administered: 1) long and pristine MWCNT (CNT-long) (3.9 mu m); 2) short and pristine CNT (CNT-short) …	10.1016/j.etap.2021.103702					X
Hamana, A; Takahashi, Y; Tanioka, A; Nishikawa, M; Takakura, Y	Safe and effective interferon-beta gene therapy for the treatment of multiple sclerosis by regulating biological activity through the design of interferon-beta-galectin-9 fusion proteins	INTERNATIONAL JOURNAL OF PHARMACEUTICS (536)1	2018	Multiple sclerosis (MS) is the most common demyelinating disease. Despite the historical use of interferon-beta (IFN-beta) for the treatment of patients with MS, concerns exist regarding the side effects of IFN-beta. In this study, we designed a series of novel IFN-beta fusion proteins containing galectin-9 (gal-9), which exerts immunosuppressive effects through the binding to its receptor on act…	10.1016/j.ijpharm.2017.12.010					X
Hua, M; Liang, XM; Wei, CY; Zhang, L; Pan, XH; Jiang, JJ; Ni, L; Jiang, JC	Inherent safer design for chemical process of 1,4-dioldiacetate-2-butene oxidized by ozone	CHEMICAL ENGINEERING COMMUNICATIONS (207)10	2020	Oxidation reaction is the typical thermal runaway reaction, and the reaction of 1, 4-dioldiacetate-2-Butene oxidized by ozone was investigated in this study. Firstly, the thermal hazards of the oxidative exothermic reactions were identified and evaluated combined process risk assessment method. The Qualitative Assessment for Inherently Safer Design (QAISD) was used to identify the risk of the rea…	10.1080/00986445.2019.1657420			X
Ishmaev, G; Vermaas, PE; Hoeneveld, D; van Gelder, P	Safe by Design Regulation for Academic Experimentation and Value Conflicts: An Exploration of Solution Directions	INTERNATIONAL JOURNAL OF ENVIRONMENTAL RESEARCH AND PUBLIC HEALTH (18)4	2021	In this paper, we explore solution directions for the implementation of Safe by Design (SbD) in safety regimes for academic experimentation. SbD is a dynamic and anticipatory strategy for safety regulation in academic research. In this strategy, safety is taken in a broader sense including not only issues of technical precaution of avoiding risks of experimentation but also the societal responsib…	10.3390/ijerph18041554				X			Not relevant for this review since it's focused on ethical/value aspects for SbD and on the laboratory practices.
Ivanova, A; Ivanova, K; Heinze, T; Tzanov, T	Safe-by-design hybrid nanoparticles of antimicrobial silver, aminocellulose, and quorum quenching acylase eradicate bacteria and their biofilms	ABSTRACTS OF PAPERS OF THE AMERICAN CHEMICAL SOCIETY (257)	2019					X
Ivask, A; Juganson, K; Bondarenko, O; Visnapuu, M; Kasemets, K; Kahru, A	Safe-by-design and toxic-by design, two approaches for design of novel functional nanomaterials	TOXICOLOGY LETTERS (229)	2014		10.1016/j.toxlet.2014.06.070			X				This is an abstract announcing a paper but the paper itself cannot be found (same as another one above). However, the papers seems not relevant for this review based on the abstract as it is not defining and discussing SbD conceptually but rather a case study.
Jaffe, M; Allam, S	Safer fuels by integrating polymer theory into design	SCIENCE (350)6256	2015		10.1126/science.aac9827					X
Janicijevic, Z; Stankovic, A; Zegura, B; Veljovic, D; Djekic, L; Krajisnik, D; Filipic, M; Stevanovic, MM	Safe-by-design gelatin-modified zinc oxide nanoparticles	JOURNAL OF NANOPARTICLE RESEARCH (23)9	2021	We report an innovative low-cost wet precipitation synthesis method for gelatin-modified zinc oxide nanoparticles (GM ZnO NPs) at the interface between the gelatin hydrogel and aqueous electrolyte. Diffusion of ammonia through the hydrogel matrices with different gelatin contents induced precipitation of the product in contact with the surface of the aqueous solution of zinc ions. The obtained pr…	10.1007/s11051-021-05312-3			X
Janko, C; Zaloga, J; Pottler, M; Durr, S; Eberbeck, D; Tietze, R; Lyer, S; Alexiou, C	Strategies to optimize the biocompatibility of iron oxide nanoparticles - SPIONs safe by design	JOURNAL OF MAGNETISM AND MAGNETIC MATERIALS (431)	2017	Various nanoparticle systems have been developed for medical applications in recent years. For constant improvement of efficacy and safety of nanoparticles, a close interdisciplinary interplay between synthesis, physicochemical characterizations and toxicological investigations is urgently needed. Based on combined toxicological data, we follow a safe-by design strategy for our superparamagnetic …	10.1016/j.jmmm.2016.09.034			X
Jantunen, P; Rauscher, H; Sintes, JR; Rasmussen, K	Commentary on Safe(r) by design implementation in the nanotechnology industry [NanoImpact 20 (2020) 100267] and Integrative approach in a safe by design context combining risk, life cycle and socio-economic assessment for safer and sustainable nanomaterials [NanoImpact 23 (2021) 100335]	NANOIMPACT (24)	2021	Commentary on two recent papers published in NanoImpact Safe(r) by design implementation in the nano -technology industry and Integrative approach in a safe by design context combining risk, life cycle and socio-economic assessment for safer and sustainable nanomaterials.	10.1016/j.impact.2021.100356		X					This is a commentary on Sánchez Jiménez et al. (2021) and Salieri et al. (2020). Jantunen et al. argue that the above mentioned authors strive for a sequantial approach adding LCA and SEA after SbD, while they argue that it would be better to strive for "An integrated approach striving, at the same time, for both safety and sustainability in material and product design would therefore be benefici…
Jeliazkova, N; Doganis, P; Fadeel, B; Grafstrom, R; Hastings, J; Jeliazkov, V; Kohonen, P; Munteanu, CR; Sarimveis, H; Smeets, B; Tsiliki, G; Vorgrimmler, D; Willighagen, E	The first eNanoMapper prototype: a substance database to support safe-by-design	2014 IEEE INTERNATIONAL CONFERENCE ON BIOINFORMATICS AND BIOMEDICINE (BIBM) ()	2014	The EU-funded eNanoMapper project proposes a computational infrastructure for toxicological data management of engineered nanomaterials (ENMs) based on open standards, ontologies and an interoperable design to enable a more effective, integrated approach to European research in nanotechnology. eNanoMapper's goal is to support the collaborative safety assessment for ENMs by creating a modular, ext…				X		X
Sánchez-Jiménez, A; Puelles, R; Perez-Fernandez, M; Barruetabena, L; Jacobsen, NR; Suarez-Merino, B; Micheletti, C; Manier, N; Salieri, B; Hischier, R; Tsekovska, R; Handzhiyski, Y; Bouillard, J; Oudart, Y; Galea, KS; Kelly, S; Shandilya, N; Goede, H; Gomez-Cordon, J; Jensen, KA; van Tongeren, M; Apostolova, MD; Llopis, IR	Safe(r) by design guidelines for the nanotechnology industry	NANOIMPACT (25)	2022	Expectations for safer and sustainable chemicals and products are growing to comply with the United Nations and European strategies for sustainability. The application of Safe(r) by Design (SbD) in nanotechnology implies an iterative process where functionality, human health and safety, environmental and economic impact and cost are assessed and balanced as early as possible in the innovation pro…	10.1016/j.impact.2022.100385	X
Sánchez-Jiménez, A; Puelles, R; Perez-Fernandez, M; Gomez-Fernandez, P; Barruetabena, L; Jacobsen, NR; Suarez-Merino, B; Micheletti, C; Manier, N; Trouiller, B; Navas, JM; Kalman, J; Salieri, B; Hischier, R; Handzhiyski, Y; Apostolova, MD; Hadrup, N; Bouillard, J; Oudart, Y; Merino, C; Garcia, E; Liguori, B; Sabella, S; Rose, J; Masion, A; Galea, KS; Kelly, S; Stepankova, S; Mouneyrac, C; Barrick…	Safe(r) by design implementation in the nanotechnology industry	NANOIMPACT (20)	2020	The implementation of Safe(r) by Design (SbD) in industrial innovations requires an integrated approach where the human, environmental and economic impact of the SbD measures is evaluated across and throughout the nanomaterial (NM) life cycle. SbD was implemented in six industrial companies where SbD measures were applied to NMs, nano-enabled products (NEPs) and NM/NEP manufacturing processes. Th…	10.1016/j.impact.2020.100267	X
Johnson, L; Aglas, L; Soh, WT; Geppert, M; Hofer, S; Hofstaetter, N; Briza, P; Ferreira, F; Weiss, R; Brandstetter, H; Duschl, A; Himly, M	Structural Alterations of Antigens at the Material Interface: An Early Decision Toolbox Facilitating Safe-by-Design Nanovaccine Development	INTERNATIONAL JOURNAL OF MOLECULAR SCIENCES (22)19	2021	Nanomaterials have found extensive interest in the development of novel vaccines, as adjuvants and/or carriers in vaccination platforms. Conjugation of protein antigens at the particle surface by non-covalent adsorption is the most widely used approach in licensed particulate vaccines. Hence, it is essential to understand proteins' structural integrity at the material interface in order to develo…	10.3390/ijms221910895					X		not relevant, is about vaccines
Jun, GT; Ward, J; Clarkson, PJ	Systems modelling approaches to the design of safe healthcare delivery: ease of use and usefulness perceived by healthcare workers	ERGONOMICS (53)7	2010	The UK health service, which had been diagnosed to be seriously out of step with good design practice, has been recommended to obtain knowledge of design and risk management practice from other safety-critical industries. While these other industries have benefited from a broad range of systems modelling approaches, healthcare remains a long way behind. In order to investigate the healthcare-spec…	10.1080/00140139.2010.489653					X
Kallhoff, A	Safer by Design and Trump Rights of Citizens	NANOETHICS (11)3	2017	The debate on safer by design has primarily been focused on strategies to render products safer during the design process. This article focuses on correlated basic legal rights of citizens. The reference to trump rights is helpful in highlighting two normative claims: Firstly, products that are safer by design are suitable instruments to protect the bodily integrity and health of potential users.…	10.1007/s11569-017-0308-3				X
Karayannis, P; Petrakli, F; Gkika, A; Koumoulos, EP	3D-Printed Lab-on-a-Chip Diagnostic Systems-Developing a Safe-by-Design Manufacturing Approach	MICROMACHINES (10)12	2019	The aim of this study is to provide a detailed strategy for Safe-by-Design (SbD) 3D-printed lab-on-a-chip (LOC) device manufacturing, using Fused Filament Fabrication (FFF) technology. First, the applicability of FFF in lab-on-a-chip device development is briefly discussed. Subsequently, a methodology to categorize, identify and implement SbD measures for FFF is suggested. Furthermore, the most c…	10.3390/mi10120825					X
Knutson, D; Li, GG; Prevot, T; Arnold, L; Chiou, LC; Ernst, M; Mihovilovic, M; Savic, M; Sieghart, W; Sibille, E; Cook, J	Combatting the opioid and benzodiazepine epidemic by the synthesis of novel safer drugs designed to be functionally selective for alpha 5-or alpha 6-containing GABAA receptors	ABSTRACTS OF PAPERS OF THE AMERICAN CHEMICAL SOCIETY (258)	2019					X
Kraegeloh, A; Suarez-Merino, B; Sluijters, T; Micheletti, C	Implementation of Safe-by-Design for Nanomaterial Development and Safe Innovation: Why We Need a Comprehensive Approach	NANOMATERIALS (8)4	2018	Manufactured nanomaterials (MNMs) are regarded as key components of innovations in various fields with high potential impact (e.g., energy generation and storage, electronics, photonics, diagnostics, theranostics, or drug delivery agents). Widespread use of MNMs raises concerns about their safety for humans and the environment, possibly limiting the impact of the nanotechnology-based innovation. …	10.3390/nano8040239	X
Krouwel, SJC; Dierickx, ER; Heesterbeek, S; Klaassen, P	Adopting Safe-by-Design in Science and Engineering Academia: The Soil May Need Tilling	INTERNATIONAL JOURNAL OF ENVIRONMENTAL RESEARCH AND PUBLIC HEALTH (19)4	2022	In recent years, Safe-by-Design (SbD) has been launched as a concept that supports science and engineering such that a broad conception of safety is embraced and structurally embedded. The present study explores the extent to which academics in a distinctively relevant subset of science and engineering disciplines are receptive towards the work and teaching practices SbD would arguably imply. Thr…	10.3390/ijerph19042075				X			"The present study explores the extent to which academics in a distinctively relevant subset of science and engineering disciplines are receptive towards the work and teaching practices SbD would arguably imply. Through 29 interviews with researchers in nanotechnology, biotechnology and chemical engineering differences in perceptions of safety, life-cycle thinking and responsibility for safety we…
Labille, J; Catalano, R; Slomberg, D; Motellier, S; Pinsino, A; Hennebert, P; Santaella, C; Bartolomei, V	Assessing Sunscreen Lifecycle to Minimize Environmental Risk Posed by Nanoparticulate UV-Filters - A Review for Safer-by-Design Products (vol 8, 101, 2020)	FRONTIERS IN ENVIRONMENTAL SCIENCE (8)	2020		10.3389/fenvs.2020.597861	X
Laisney, J; Rosset, A; Bartolomei, V; Predoi, D; Truffier-Boutry, D; Artous, S; Berge, V; Brochard, G; Michaud-Soret, I	TiO2 nanoparticles coated with bio-inspired ligands for the safer-by-design development of photocatalytic paints	ENVIRONMENTAL SCIENCE-NANO (8)1	2021	Addition of titanium dioxide nanoparticles (TiO2 NPs) in photocatalytic paints represents a promising alternative aiming to mineralize gaseous pollutants, such as volatile organic compounds (VOCs). However, the risks of release of nanoparticles to human health and the environmental impact have to be taken carefully into account for their development. To take into account these risks, we develop a…	10.1039/d0en00947d			X
Le, TC; Yin, H; Chen, R; Chen, YD; Zhao, L; Casey, PS; Chen, CY; Winkler, DA	An Experimental and Computational Approach to the Development of ZnO Nanoparticles that are Safe by Design	SMALL (12)26	2016	Zinc oxide nanoparticles have found wide application due to their unique optoelectronic and photocatalytic characteristics. However, their safety aspects remain of critical concern, prompting the use of physicochemical modifications of pristine ZnO to reduce any potential toxicity. However, the relationships between these modifications and their effects on biology are complex and still relatively…	10.1002/smll.201600597			X
Lee, Y; Kim, H; Yim, T; Lee, KY; Choi, W	Compositional core-shell design by nickel leaching on the surface of Ni-rich cathode materials for advanced high-energy and safe rechargeable batteries	JOURNAL OF POWER SOURCES (400)	2018	Ni-rich layered oxides are promising cathode candidates for Li-ion batteries because of their high discharge capacity, high energy density, and low cost. However, poor cycling stability and thermal instability during cycling limit their commercial application in electric vehicles. To overcome these drawbacks, Ni-rich transition metal hydroxide precursors comprising a Ni-rich core and Ni-less surf…	10.1016/j.jpowsour.2018.08.006			X
Lewinska, A; Domzal-Kedzia, M; Jaromin, A; Lukaszewicz, M	Nanoemulsion Stabilized by Safe Surfactin from Bacillus subtilis as a Multifunctional, Custom-Designed Smart Delivery System	PHARMACEUTICS (12)10	2020	The developing field of bio-nanotechnology aims to advance colloidal research via the introduction of multifunctional nanoparticles to augment the dermal effectiveness of active substances. Self-emulsifying drug delivery systems (SEDDS)-isotropic mixtures of oils, surfactants, solvents and co-solvents or surfactants-are attracting interest in the cosmeceutical field. As part of this study, SEDDS …	10.3390/pharmaceutics12100953			X
Lin, SJ; Yu, TY; Yu, ZY; Hu, XL; Yin, DQ	Nanomaterials Safer-by-Design: An Environmental Safety Perspective	ADVANCED MATERIALS (30)17	2018	Designing safer nanomaterials and nanostructures has gained increasing attention in the field of nanoscience and technology in recent years. Based on the body of experimental evidence contributed by environmental health and safety studies, materials scientists now have a better grasp on the relationships between the nanomaterials' physicochemical characteristics and their hazard/safety profiles. …	10.1002/adma.201705691	X
Lopes, L; Martins, F	A safe-by-design programming language for wireless sensor networks	JOURNAL OF SYSTEMS ARCHITECTURE (63)	2016	Wireless sensor networks are notoriously difficult to program and debug. This fact not only stems from the nature of the hardware, but also from the current approaches for developing programming languages and runtime systems for these platforms. In particular, current systems do not place enough stress on providing formal descriptions of the language and its runtime system, and on proving static …	10.1016/j.sysarc.2016.01.004					X
Loulou, I; Jmaiel, M; Drira, K; Kacem, AH	P/S-CoM: Building correct by design Publish/Subscribe architectural styles with safe reconfiguration	JOURNAL OF SYSTEMS AND SOFTWARE (83)3	2010	We present P/S-CoM, a formal approach supporting the correct modeling of Publish/Subscribe architectural styles and safe reconfiguration of dynamic architectures for event-based communication. We elaborate a set of patterns and we define the corresponding composition rules to build correct by design Publish/Subscribe styles. The defined patterns and rules respect the principle of information diss…	10.1016/j.jss.2009.09.031					X
Lynch, I; Weiss, C; Valsami-Jones, E	A strategy for grouping of nanomaterials based on key physico-chemical descriptors as a basis for safer-by-design NMs	NANO TODAY (9)3	2014	There is an urgent need to establish a fundamental understanding of the mechanisms of nanomaterial (NM) interaction with living systems and the environment, in order for regulation of NMs to keep pace with their increasing industrial application. Identification of critical properties (physicochemical descriptors) that confer the ability to induce harm in biological systems is crucial, enabling bo…	10.1016/j.nantod.2014.05.001			X		X
Mantecca, P; Kasemets, K; Deokar, A; Perelshtein, L; Gedanken, A; Bahk, YK; Kianfar, B; Wang, J	Airborne Nanoparticle Release and Toxicological Risk from Metal-Oxide-Coated Textiles: Toward a Multiscale Safe-by-Design Approach	ENVIRONMENTAL SCIENCE & TECHNOLOGY (51)16	2017	Nano metal oxides have been proposed as alternatives to silver (Ag) nanoparticles (NPs) for antibacterial coatings. Here, cotton and polyester-cotton fabrics were sonochemically coated with zinc oxide (ZnO) and copper oxide (CuO) NPs. By varying the reaction solvent (water or ethanol), NPs with different sizes and shapes were synthesized. The cytotoxic and pro-inflammatory effects of studied NPs …	10.1021/acs.est.7b02390			X
Marchioni, M; Veronesi, G; Worms, I; Ling, WL; Gallon, T; Leonard, D; Gateau, C; Chevallet, M; Jouneau, PH; Carlini, L; Battocchio, C; Delangle, P; Michaud-Soret, I; Deniaud, A	Safer-by-design biocides made of tri-thiol bridged silver nanoparticle assemblies	NANOSCALE HORIZONS (5)3	2020	Silver nanoparticles (AgNPs) are efficient biocides increasingly used in consumer products and medical devices. Their activity is due to their capacity to release bioavailable Ag(i) ions making them long-lasting biocides but AgNPs themselves are usually easily released from the product. Besides, AgNPs are highly sensitive to various chemical environments that triggers their transformation, decrea…	10.1039/c9nh00286c			X
Marks, ED; Cheng, T; Teizer, J	Laser Scanning for Safe Equipment Design That Increases Operator Visibility by Measuring Blind Spots	JOURNAL OF CONSTRUCTION ENGINEERING AND MANAGEMENT (139)8	2013	One-fourth of construction industry fatalities are caused by worker collisions with construction equipment. Nonvisible areas (blind spots) for equipment operators are contributing factors to many of these fatalities because equipment operators are unable to see ground personnel at certain locations around their equipment. Presented are the design and validation of a unique technique for measuring…	10.1061/(ASCE)CO.1943-7862.0000690					X
Marques, C; Som, C; Schmutz, M; Borges, O; Borchard, G	How the Lack of Chitosan Characterization Precludes Implementation of the Safe-by-Design Concept	FRONTIERS IN BIOENGINEERING AND BIOTECHNOLOGY (8)	2020	Efficacy and safety of nanomedicines based on polymeric (bio)materials will benefit from a rational implementation of a Safe-by-Design (SbD) approach throughout their development. In order to achieve this goal, however, a standardization of preparation and characterization methods and their accurate reporting is needed. Focusing on the example of chitosan, a biopolymer derived from chitin and fre…	10.3389/fbioe.2020.00165			X		X
Matsumoto, R; Inoue, N; Nakao, T; Nakashima, M; Yamane, R; Yanagihara, K	NURSES CAN CONTRIBUTE TO SAFE CANCER CHEMOTHERAPY BY THE DESIGN ON ELECTRIC CHARTS TO EVALUATE ADVERSE EVENTS	ANNALS OF ONCOLOGY (24)	2013		10.1093/annonc/mdt460.105					X
Mendes, LA; Amorim, MJB; Scott-Fordsmand, JJ	Assessing the toxicity of safer by design CuO surface-modifications using terrestrial multispecies assays	SCIENCE OF THE TOTAL ENVIRONMENT (678)	2019	Safer by design (SbD) modifications of nanomaterials (NMs) have been pursued, aiming to maintain functionality and yet reduce hazard and support sustainable nanotechnology. The present case study involves copper oxide nanomaterials (CuO NMs) used in paint that have been surface modified by a SBD approach to particles coated with citrate (CIT-), ascorbate (ASC(-)), polyethylenimine (PEI+), and pol…	10.1016/j.scitotenv.2019.04.444			X
Miao, ZH; Huang, DD; Wang, YC; Li, WJ; Fan, LN; Wang, JG; Ma, Y; Zhao, QL; Zha, ZB	Safe-by-Design Exfoliation of Niobium Diselenide Atomic Crystals as a Theory-Oriented 2D Nanoagent from Anti-Inflammation to Antitumor	ADVANCED FUNCTIONAL MATERIALS (30)40	2020	The accompanying relationship between tumor and inflammation raises the concept of concurrent antitumor and anti-inflammation treatment in the clinic. Despite the wide application of 2D atomic crystals for cancer theranostics, their anti-inflammation function has been rarely explored. Herein, it is reported that niobium diselenide nanosheets (NbSe(2)NSs), a star 2D superconducting atomic crystal,…	10.1002/adfm.202001593			X
Micheletti, C; Roman, M; Tedesco, E; Olivato, I; Benetti, F	Implementation of the NANoREG Safe-by-Design approach for different nanomaterial applications	5TH NANOSAFE INTERNATIONAL CONFERENCE ON HEALTH AND SAFETY ISSUES RELATED TO NANOMATERIALS FOR A SOCIALLY RESPONSIBLE APPROACH (NANOSAFE 2016) (838)	2017	The Safe-by-Design (SbD) concept is already in use in different industrial sectors as an integral part of the innovation process management. However, the adopted approach is often limited to design solutions aiming at hazard reduction. Safety is not always considered during the innovation process, mainly due to the lack of knowledge (e.g. in small and medium companies, SMEs) and the lack of dialo…	10.1088/1742-6596/838/1/012019			X
Movia, D; Gerard, V; Maguire, CM; Jain, N; Bell, AP; Nicolosi, V; O'Neill, T; Scholz, D; Gun'ko, Y; Volkov, Y; Prina-Mello, A	A safe-by-design approach to the development of gold nanoboxes as carriers for internalization into cancer cells	BIOMATERIALS (35)9	2014	Gold nanomaterials are currently raising a significant interest for human welfare in the field of clinical diagnosis, therapeutics for chronic pathologies, as well as of many other biomedical applications. In particular, gold nanomaterials are becoming a promising technology for developing novel approaches and treatments against widespread societal diseases such as cancer. In this study, we inves…	10.1016/j.biomaterials.2013.12.057			X
Musino, D; Rosset, A; Lelong, C; Luche, S; Berge, V; Brochard, G; Plumail, M; Trouiller, B; Auger, A; Guiot, A; Patouillard, J; Desrousseaux, S; Artous, S; Rabilloud, T; Boutry, D; Capron, I	CNC/AgNP hybrids as safer-by-design biocides in paints	ENVIRONMENTAL SCIENCE-NANO (8)12	2021	In this work, biocidal paints are designed by a safer-by-design approach where an efficient antibacterial activity is provided by nanohybrids consisting of silver nanoparticles (AgNPs) nucleated on a bio-based substrate (cellulose nanocrystals, CNCs), to be included in an amount as low as possible and dispersed in an aqueous suspension. Three CNC/AgNP hybrids varying in CNC surface modifications …	10.1039/d1en00407g			X
Naatz, H; Lin, SJ; Li, RB; Jiang, W; Ji, ZX; Chang, CH; Koser, J; Thoming, J; Xia, T; Nel, AE; Madler, L; Pokhrel, S	Safe-by-Design CuO Nanoparticles via Fe-Doping, Cu-O Bond Length Variation, and Biological Assessment in Cells and Zebrafish Embryos	ACS NANO (11)1	2017	The safe implementation of nanotechnology requires nanomaterial hazard assessment in accordance with the material physicochemical properties that trigger the injury response at the nano/bio interface. Since CuO nanoparticles (NPs) are widely used industrially and their dissolution properties play a major role in hazard potential, we hypothesized that tighter bonding of Cu to Fe by particle doping…	10.1021/acsnano.6b06495			X
Nau, K; Muller, T; Sampaio, DJBS; Scholz, SG	Nano Inks for Additive Manufacturing - A Safe-by-Design-Approach	ACHI 2017: THE TENTH INTERNATIONAL CONFERENCE ON ADVANCES IN COMPUTER-HUMAN INTERACTIONS ()	2017	Additive manufacturing (AM) enables a new manufacturing paradigm, such as the rapid, distributive manufacture of complex 3D objects. Nanoparticles are in particular suitable for ink formulation of novel PolyJet inks to obtain functionalities embedded in the AM process. However, the impact and interaction of nanomaterials on environment and human health is widely discussed today. This paper deals …				X
Nguyen, AM; del Real, AEP; Durupthy, O; Lanone, S; Chaneac, C; Carenco, S	Risk Analysis and Technology Assessment of Emerging (Gd,Ce)(2)O2S Multifunctional Nanoparticles: An Attempt for Early Safer-by-Design Approach	NANOMATERIALS (12)3	2022	Acceptability and relevance of nanoparticles in the society is greatly improved using a safer-by-design strategy. However, this is difficult to implement when too late in the development process or when nanoparticles are already on the market (e.g., TiO2). We employ this strategy for emerging nanoparticles of lanthanide oxysulfide of formula (Gd,Ce)(2)O2S, relevant for photocatalysis as well as f…	10.3390/nano12030422	X
Packroff, R; Marx, R	Safe and Sustainable by Design-An Interdisciplinary Challenge for Future-Proof Chemistry	CHEMPLUSCHEM (87)3	2022	Advanced materials (such as the TiO2 fibers shown) are important building blocks for a post-fossil circular economy that is fostered by the Horizon Europe research framework programme from 2021 to 2026. Rolf Packroff and Romy Marx outline how this increases the need for scientists in material development to address issues of safe and sustainable design, as well as interdisciplinary cooperation wi…	10.1002/cplu.202100534		X					Editorial
Park, DH; Gautam, M; Park, SJ; Hwang, J; Yong, CS; Kim, JO; Byeon, JH	Plug-and-play safe-by-design production of metal-doped tellurium nanoparticles with safer antimicrobial activities	ENVIRONMENTAL SCIENCE-NANO (6)7	2019	Safe-by-design principles, such as optimum balance of material function and safety, have received much recent attention. On-demand production is also receiving great interest in the realization of nanotechnologies that meet unpredictable demands of reconfiguration and modification to maximize the efficacy of materials processing. Antimicrobial nanomaterials are representative subjects of these ap…	10.1039/c9en00372j					X
Pavlicek, A; Part, F; Gressler, S; Rose, G; Gazso, A; Ehmoser, EK; Huber-Humer, M	Testing the Applicability of the Safe-by-Design Concept: A Theoretical Case Study Using Polymer Nanoclay Composites for Coffee Capsules	SUSTAINABILITY (13)24	2021	The production and use of engineered nanomaterials and nano-enabled products is increasing, enabling innovations in many application areas, e.g., in the sector of food contact materials. However, nanosafety-relevant information for chemical risk assessment is still scarce, leading to a high level of uncertainty and making the early integration of safety to the innovation process indispensable. Th…	10.3390/su132413951	X
Rabani, I; Lee, SH; Kim, HS; Yoo, J; Hussain, S; Maqbool, T; Seo, YS	Engineering-safer-by design ZnO nanoparticles incorporated cellulose nanofiber hybrid for high UV protection and low photocatalytic activity with mechanism	JOURNAL OF ENVIRONMENTAL CHEMICAL ENGINEERING (9)5	2021	Cellulose nanofiber (CNF) is a well-known biocompatible polymer with various versatile characteristics. In recent years, nano-sized materials with high flexibility and biocompatibility that exhibit ultraviolet (UV) blocking properties with maximum dispersion have attracted increasing attention, particularly, materials with photo catalytic activity. In this study, zinc oxide nanoparticle (ZnO NP) …	10.1016/j.jece.2021.105845			X
Remzova, M; Zouzelka, R; Brzicova, T; Vrbova, K; Pinkas, D; Rossner, P; Topinka, J; Rathousky, J	Toxicity of TiO2, ZnO, and SiO2 Nanoparticles in Human Lung Cells: Safe-by-Design Development of Construction Materials	NANOMATERIALS (9)7	2019	Rapid progress in the development of highly efficient nanoparticle-based construction technologies has not always been accompanied by a corresponding understanding of their effects on human health and ecosystems. In this study, we compare the toxicological effects of pristine TiO2, ZnO, SiO2, and coated SiO2 nanoparticles, and evaluate their suitability as additives to consolidants of weathered c…	10.3390/nano9070968			X
Rizzo, R; Musolino, A; Bucchi, F; Forte, P; Frendo, F	Magnetic FEM Design and Experimental Validation of an Innovative Fail-Safe Magnetorheological Clutch Excited by Permanent Magnets	IEEE TRANSACTIONS ON ENERGY CONVERSION (29)3	2014	This paper describes the magnetic design of an innovative fail-safe clutch based on magnetorheological fluid (MRF). A cylindrical arrangement of permanent magnets (PMs) is used to excite the fluid. The suitable distribution of magnetic field inside the MRF and the transmissible torque is obtained by moving the PMs along the axial direction. The device is designed using a magneto/mechanical FEM mo…	10.1109/TEC.2014.2325964					X
Robaey, Z; Spruit, SL; van de Poel, I	The Food Warden: An Exploration of Issues in Distributing Responsibilities for Safe-by-Design Synthetic Biology Applications	SCIENCE AND ENGINEERING ETHICS (24)6	2018	The Safe-by-Design approach in synthetic biology holds the promise of designing the building blocks of life in an organism guided by the value of safety. This paves a new way for using biotechnologies safely. However, the Safe-by-Design approach moves the bulk of the responsibility for safety to the actors in the research and development phase. Also, it assumes that safety can be defined and unde…	10.1007/s11948-017-9969-0				X			Reports a stakeholder workshop and is not about chemicals or materials s much, but rather on ethics and procedures, therefore not so relevant for this review.
Roca, CP; Rallo, R; Fernandez, A; Giralt, F	Nanoinformatics for Safe-by-Design Engineered Nanomaterials	TOWARDS EFFICIENT DESIGNING OF SAFE NANOMATERIALS: INNOVATIVE MERGE OF COMPUTATIONAL APPROACHES AND EXPERIMENTAL TECHNIQUES (25)	2013		10.1039/9781849735476-00089					X
Rodrigues, AF; Newman, L; Jasim, D; Mukherjee, SP; Wang, J; Vacchi, IA; Menard-Moyon, C; Bianco, A; Fadeel, B; Kostarelos, K; Bussy, C	Size-Dependent Pulmonary Impact of Thin Graphene Oxide Sheets in Mice: Toward Safe-by-Design	ADVANCED SCIENCE (7)12	2020	Safety assessment of graphene-based materials (GBMs) including graphene oxide (GO) is essential for their safe use across many sectors of society. In particular, the link between specific material properties and biological effects needs to be further elucidated. Here, the effects of lateral dimensions of GO sheets in acute and chronic pulmonary responses after single intranasal instillation in mi…	10.1002/advs.201903200			X
Rose, J; Auffan, M; de Garidel-Thoron, C; Artous, S; Auplat, C; Brochard, G; Capron, I; Carriere, M; Cathala, B; Charlet, L; Clavaguera, S; Heulin, T; Labille, J; Orsiere, T; Peyron, S; Rabilloud, T; Santaella, C; Truffier-Boutry, D; Wortham, H; Masion, A	The SERENADE project; a step forward in the safe by design process of nanomaterials: The benefits of a diverse and interdisciplinary approach	NANO TODAY (37)	2021	Developing safe nanomaterials has become a major concern in all the industry sectors using advanced materials. However, there are very few initiatives addressing this issue. The SERENADE project, with its long-term funding scheme, provided a unique opportunity to foster a coordinated, yet diverse approach to investigate the safe-by-design development of nanomaterials in a variety of application f…	10.1016/j.nantod.2020.101065	X
Rose, J; Auffan, M; De Garidel-Thoron, C; Artous, S; Brochard, G; Clavaguera, S; Truffier-Boutry, D; Wortham, H; Masion, A	The SERENADE project - A step forward in the Safe by Design process of nanomaterials: Moving towards a product-oriented approach	NANO TODAY (39)	2021	Recent research efforts have gone into formalizing and standardizing the Safe by Design process of nanomaterials. This usually results in a structured and (most often) sequential approach deliberately putting the focus on hazard and exposure issues regarding the nanomaterial itself in a bottom-up progression of material development. However, this general strategy lacks flexibility. Within the pro…	10.1016/j.nantod.2021.101238	X
Rosset, A; Bartolomei, V; Laisney, J; Shandilya, N; Voisin, H; Morin, J; Michaud-Soret, I; Capron, I; Wortham, H; Brochard, G; Berge, V; Carriere, M; Dussert, F; Le Bihan, O; Dutouquet, C; Benayad, A; Truffier-Boutry, D; Clavaguera, S; Artous, S	Towards the development of safer by design TiO2-based photocatalytic paint: impacts and performances	ENVIRONMENTAL SCIENCE-NANO (8)3	2021	Addition of titanium dioxide (TiO2) (nano)particles into photocatalytic paints represents a promising alternative aiming to mineralize gaseous pollutants, such as volatile organic compounds (VOCs) into innocuous species (H2O and CO2). Despite important industrial and economic benefits, some concerns were raised regarding the risks associated with nano-objects and their human and environmental imp…	10.1039/d0en01232g			X
Rubio, L; Pyrgiotakis, G; Beltran-Huarac, J; Zhang, YP; Gaurav, J; Deloid, G; Spyrogianni, A; Sarosiek, KA; Bello, D; Demokritou, P	Safer-by-design flame-sprayed silicon dioxide nanoparticles: the role of silanol content on ROS generation, surface activity and cytotoxicity	PARTICLE AND FIBRE TOXICOLOGY (16)1	2019	Background: Amorphous silica nanoparticles (SiO2 NPs) have been regarded as relatively benign nanomaterials, however, this widely held opinion has been questioned in recent years by several reports on in vitro and in vivo toxicity. Surface chemistry, more specifically the surface silanol content, has been identified as an important toxicity modulator for SiO2 NPs. Here, quantitative relationships…	10.1186/s12989-019-0325-1			X
Ruppert, AS; Shoben, AB	Overall success rate of a safe and efficacious drug: Results using six phase 1 designs, each followed by standard phase 2 and 3 designs	CONTEMPORARY CLINICAL TRIALS COMMUNICATIONS (12)	2018	To evaluate the overall success rate of a new drug, phase 1, 2, and 3 trials were simulated using eight toxicity and two non-decreasing efficacy profiles. Six phase 1 designs including the standard 3 + 3, CCD, BOIN, mTPI, mTPI-2, and CRM were considered with standard phase 2 and 3 designs. Based on our results, phase 1 design recommendations are provided when data informing the general shape of t…	10.1016/j.conctc.2018.08.010					X
Ryan, C; Ali, A; Sabourin, H	A Culturally Safe and Trauma-Informed Sexually Transmitted Blood Borne Infection (STBBI) Intervention Designed by and for Incarcerated Indigenous Women and Gender-Diverse People	INTERNATIONAL JOURNAL OF INDIGENOUS HEALTH (15)1	2020	Indigenous women are grossly overrepresented both within the federal correctional system and among Sexually Transmitted Blood Borne Infection (STBBI) diagnoses in Canada. Mainstream approaches continue to fall short in addressing Human Immunodeficiency Virus, Hepatitis C an other STBBIs within this population. In this paper, we argue that, in order to be successful, STBBI programs and services mu…	10.32799/ijih.v15i1.34061					X
Rybinska-Fryca, A; Mikolajczyk, A; Puzyn, T	Structure-activity prediction networks (SAPNets): a step beyond Nano-QSAR for effective implementation of the safe-by-design concept	NANOSCALE (12)40	2020	A significant number of experimental studies are supported by computational methods such as quantitative structure-activity relationship modeling of nanoparticles (Nano-QSAR). This is especially so in research focused on design and synthesis of new, safer nanomaterials using safe-by-design concepts. However, Nano-QSAR has a number of important limitations. For example, it is not clear which descr…	10.1039/d0nr05220e			X			X	Focus on QSARs, not so much on SbD
Salieri, B; Barruetabena, L; Rodriguez-Llopis, I; Jacobsen, NR; Manier, N; Trouiller, B; Chapon, V; Hadrup, N; Jimenez, AS; Micheletti, C; Merino, BS; Brignon, JM; Bouillard, J; Hischier, R	Integrative approach in a safe by design context combining risk, life cycle and socio-economic assessment for safer and sustainable nanomaterials	NANOIMPACT (23)	2021	Moving towards safe and sustainable innovations is an international policy ambition. In the on-hand manuscript, a concept combining safe by design and sustainability was implemented through the integration of human and environmental risk assessment, life cycle assessment as well as an assessment of the economic viability. The result is a nested and iterative process in form of a decision tree tha…	10.1016/j.impact.2021.100335	X
Schmutz, M; Borges, O; Jesus, S; Borchard, G; Perale, G; Zinn, M; Sips, AAJAM; Soeteman-Hernandez, LG; Wick, P; Som, C	A Methodological Safe-by-Design Approach for the Development of Nanomedicines	FRONTIERS IN BIOENGINEERING AND BIOTECHNOLOGY (8)	2020	Safe-by-Design (SbD) concepts foresee the risk identification and reduction as well as uncertainties regarding human health and environmental safety in early stages of product development. The EU's NANoREG project and further on the H2020 ProSafe initiative, NanoReg2, and CALIBRATE projects have developed a general SbD approach for nanotechnologies (e.g., paints, textiles, etc.). Based on it, the…	10.3389/fbioe.2020.00258	X
Schuster, F; Lomello, F	From Safe Nanomanufacturing to Nanosafe-by-Design processes	NANOSAFE 2012: INTERNATIONAL CONFERENCES ON SAFE PRODUCTION AND USE OF NANOMATERIALS (429)	2013	Industrial needs in terms of multifunctional components are increasing. Many sectors are concerned, from the integrated direct nanoparticles production to the emerging combinations which include the metal matrix composites (MMC), ductile ceramics and ceramic matrix composites, polymer matrix composites (PMC) for bulk application and advanced surface coatings in the fields of automotive, aerospace…	10.1088/1742-6596/429/1/012054			X
Schwarz-Plaschg, C; Kallhoff, A; Eisenberger, I	Making Nanomaterials Safer by Design?	NANOETHICS (11)3	2017		10.1007/s11569-017-0307-4				X			Very interesting Editorial on the history of SbD and the difference between safe or safer by design, but not relevant for this review since its largely focusing on this and ethical-socioeconomic aspects of SbD. "While nano-related SbD may draw on these existing concepts in some respects, its main origin can be traced back to the Center for Biological and Environmental Nanotechnology (CBEN) at RIC…
Sealy, C	Safe-by-design' nanoparticles show reduced toxicity	NANO TODAY (6)2	2011		10.1016/j.nantod.2011.02.010			X				Not relevant for this review since this is a "News item" on "researchers from the US and Germany have taken a ‘safe-by-design’ approach to reduce the in vivo toxicity ofZnO nanoparticles by doping with Fe […]."
Semenzin, E; Giubilato, E; Badetti, E; Picone, M; Ghirardini, AV; Hristozov, D; Brunelli, A; Marcomini, A	Guiding the development of sustainable nano-enabled products for the conservation of works of art: proposal for a framework implementing the Safe by Design concept	ENVIRONMENTAL SCIENCE AND POLLUTION RESEARCH (26)25	2019	Nanotechnology provides innovative and promising solutions for the conservation of cultural heritage, but the development and application of new nano-enabled products pose concerns regarding their human health and environmental risks. To address these issues, we propose a sustainability framework implementing the Safe by Design concept to support product developers in the early steps of product d…	10.1007/s11356-019-05819-2	X
Shandilya, N; Capron, I	Safer-by-design hybrid nanostructures: an alternative to conventional titanium dioxide UV filters in skin care products	RSC ADVANCES (7)33	2017	For sustainable development of nanotechnology, nanomaterials should follow a safer-by-design approach so that the associated exposure and hazard risks throughout their entire life cycle can be minimized without compromising their functioning efficiency. In this context, we present organic-inorganic hybrid nanostructures composed of titanium dioxide (TiO2) nanoparticles grafted onto cellulose nano…	10.1039/c7ra02506h			X
Simon, S; Dole, S; Farragher, Y	Custom-designed and safe-space coaching: Australian beginning principals supported by experienced peers form pipeline of confident future leaders	SCHOOL LEADERSHIP & MANAGEMENT (39)2	2019	Transition from teacher to principal involves both a technocratic response based on yearning for certainty' that requisite leadership skills will be learned, and a critically-reflexive approach to adopting a new professional identity (Crow and MOller 2017. Professional Identities of School Leaders across International Contexts: An Introduction and Rationale. Educational Management and Leadership …	10.1080/13632434.2018.1470502				X
Sinha, M; Gupta, A; Gupta, S; Singh, P; Pandit, S; Chauhan, SS; Parthasarathi, R	Analogue discovery of safer alternatives to HCQ and CQ drugs for SAR-CoV-2 by computational design	COMPUTERS IN BIOLOGY AND MEDICINE (130)	2021	COVID-19 outbreak poses a severe health emergency to the global community. Due to availability of limited data, the selection of an effective treatment is a challenge. Hydroxychloroquine (HCQ), a chloroquine (CQ) derivative administered for malaria and autoimmune diseases, has been shown to be effective against both Severe Acute Respiratory Syndrome (SARS-CoV-1) and SARS-CoV-2. Apart from the kno…	10.1016/j.compbiomed.2021.104222			X
Soeteman-Hernandez, LG; Blab, GA; Carattino, A; Dekker, F; Dekkers, S; van der Linden, M; van Silfhout, A; Noorlander, CW	Challenges of implementing nano-specific safety and safe-by-design principles in academia	NANOIMPACT (19)	2020	Safe-by-design is an essential component for creating awareness of the potential novel risks associated with the introduction of sophisticated nanomaterials (NMs) with novel properties. SbD is also a useful tool for meeting EU policy ambitions such as the European Green Deal which includes circular economy and moving towards a zero pollution (pollution-free) environment. Unidentified risks are a …	10.1016/j.impact.2020.100243				X		Not relevant for this revew since it is mainly about the results of a workshop aiming to give guidance to designers.
Sotiriou, GA; Watson, C; Murdaugh, KM; Darrah, TH; Pyrgiotakis, G; Elder, A; Brain, JD; Demokritou, P	Engineering safer-by-design silica-coated ZnO nanorods with reduced DNA damage potential	ENVIRONMENTAL SCIENCE-NANO (1)2	2014	Zinc oxide (ZnO) nanoparticles absorb UV light efficiently while remaining transparent in the visible light spectrum rendering them attractive in cosmetics and polymer films. Their broad use, however, raises concerns regarding potential environmental health risks and it has been shown that ZnO nanoparticles can induce significant DNA damage and cytotoxicity. Even though research on ZnO nanopartic…	10.1039/c3en00062a			X
Suprianto, D; Wibowo, DW; Setiawan, A; Agustina, R	Integrated application design to facilitate effective and safe student pick-up process by utilizing microcontrollers, socket TCP, and client-server database	4TH ANNUAL APPLIED SCIENCE AND ENGINEERING CONFERENCE, 2019 (1402)	2019	Long queues during student pick-up are a major problem in some elementary schools and kindergartens. Sometimes parents don't find their children in school because they may be buying food, being in class or playing in a large school area, so their parents have to wait for a long time for their children to go out to the gate. Conversely, sometimes parents are late in picking up their children, whic…	10.1088/1742-6596/1402/7/077052					X
Suraud, MG	From Safe by Design to Scientific Changes: Unforeseen Effects of Controversy Surrounding Nanotechnology in France	NANOETHICS (13)2	2019	Based on fieldwork, this article highlights the unexpected effects of controversies about nanotechnology in France. These controversies stem in particular from a strong challenge to the field by civil society protests and criticism concerning environmental and health risks. One reason for this challenge is the specific difficulties in assessing the toxicity and ecotoxicity of nanomaterials. Civil…	10.1007/s11569-019-00343-6						Suraud, MG	not relevant for this review as mostly a personal opinion on how, or how not, SbD can contribute a French discussion on nanoproducts.
Tarantini, A; Wegner, KD; Dussert, F; Sarret, G; Beal, D; Mattera, L; Lincheneau, C; Proux, O; Truffier-Boutry, D; Moriscot, C; Gallet, B; Jouneau, PH; Reiss, P; Carriere, M	Physicochemical alterations and toxicity of InP alloyed quantum dots aged in environmental conditions: A safer by design evaluation	NANOIMPACT (14)	2019	Due to their unique optical properties, quantum dots (QDs) are used in a number of optoelectronic devices and are forecasted to be used in the near future for biomedical applications. The most popular QD composition consists of cadmium selenide (CdSe) or cadmium telluride (CdTe), which has been shown to pose health risks due to the release of toxic cadmium (Cd) ions. Due to similar optical proper…	10.1016/j.impact.2019.100168			X				This is rather a case study and not a conceptual article, and therefore not relevant for this review.
Tavernaro, I; Dekkers, S; Soeteman-Hernandez, LG; Herbeck-Engel, P; Noorlander, C; Kraegeloh, A	Safe-by-Design part II: A strategy for balancing safety and functionality in the different stages of the innovation process	NANOIMPACT (24)	2021	Manufactured nanomaterials have the potential to impact an exceedingly wide number of industries and markets ranging from energy storage, electronic and optical devices, light-weight construction to innovative medical approaches for diagnostics and therapy. In order to foster the development of safer nanomaterial-containing products, two main aspects are of major interest: their functional perfor…	10.1016/j.impact.2021.100354	X
Tedesco, E; Micetic, I; Ciappellano, SG; Micheletti, C; Venturini, M; Benetti, F	Cytotoxicity and antibacterial activity of a new generation of nanoparticle-based consolidants for restoration and contribution to the safe-by-design implementation	TOXICOLOGY IN VITRO (29)7	2015	Works of art are constantly under physical, chemical and biological degradation, so constant restoration is required. Consolidation is an important step in restoration, and traditional approaches and materials have already shown their limitations. To solve these problems, new nanoparticle-based consolidants were developed. No information on their toxicity is yet available. In this work, we focuse…	10.1016/j.tiv.2015.07.002			X
Thanki, K; Zeng, XH; Justesen, S; Tejlmann, S; Falkenberg, E; Van Driessche, E; Nielsen, HM; Franzyk, H; Foged, C	Engineering of small interfering RNA-loaded lipidoid-poly(DL-lactic-co-glycolic acid) hybrid nanoparticles for highly efficient and safe gene silencing: A quality by design-based approach	EUROPEAN JOURNAL OF PHARMACEUTICS AND BIOPHARMACEUTICS (120)	2017	Safety and efficacy of therapeutics based on RNA interference, e.g., small interfering RNA (siRNA), are dependent on the optimal engineering of the delivery technology, which is used for intracellular delivery of siRNA to the cytosol of target cells. We investigated the hypothesis that commonly used and poorly tolerated cationic lipids might be replaced with more efficacious and safe lipidoids as…	10.1016/j.ejpb.2017.07.014			X
Thimbleby, H; Lewis, A; Williams, J	Making healthcare safer by understanding, designing and buying better IT	CLINICAL MEDICINE (15)3	2015	When nobody or nothing notices an error, it may turn into patient harm. We show that medical devices ignore many errors, and therefore do not adequately support patient safety. In addition to causing preventable patient harm, errors are often reported ignoring potential flaws in medical device design, and front line staff may therefore be inappropriately blamed. We present some suggestions to imp…	10.7861/clinmedicine.15-3-258					X
Toybou, D; Celle, C; Aude-Garcia, C; Rabilloud, T; Simonato, JP	A toxicology-informed, safer by design approach for the fabrication of transparent electrodes based on silver nanowires	ENVIRONMENTAL SCIENCE-NANO (6)2	2019	Fabrication of silver nanowires (AgNWs) with fine and independent control of both the diameter (from 30 to 120 nm) and length (from 5 to 120 mu m) by concomitant addition of co-nucleants and temperature control is demonstrated, and used for the preparation of size standards. Percolating random networks were fabricated using these standards and their optoelectronic properties were measured and com…	10.1039/c8en00890f			X
Toybou, D; Celle, C; Aude-Garcia, C; Rabilloud, T; Simonato, JP	A toxicology-informed, safer by design approach for the fabrication of transparent electrodes based on silver nanowires (vol 6, pg 684, 2019)	ENVIRONMENTAL SCIENCE-NANO (6)2	2019		10.1039/c9en90006c
Trullemans, L; Koelewijn, SF; Scodeller, I; Hendrickx, T; Van Puyvelde, P; Sels, BF	A guide towards safe, functional and renewable BPA alternatives by rational molecular design: structure-property and structure-toxicity relationships	POLYMER CHEMISTRY (12)41	2021	Over the last few decades extensive research gave unambiguous evidence for the endocrine disrupting nature of bisphenol A (BPA), which has been an indispensable precursor in polymer chemistry since 1946. Unfortunately, current alternatives (e.g., bisphenol F and bisphenol S), are as endocrine active as BPA, emphasizing the need for a more multidisciplinary approach to design BPA alternatives, inc…	10.1039/d1py00909e			X				"this review gathered all research concerning bio-based bisphenol structures, their performance and in vitro oestrogenic activity."
Tsalidis, GA; Soeteman-Hernandez, LG; Noorlander, CW; Saedy, S; Ommen JR van; Vijver, MG; Korevaar, G	Safe-and-Sustainable-by-Design Framework Based on a Prospective Life Cycle Assessment: Lessons Learned from a Nano-Titanium Dioxide Case Study	Int. J. Environ. Res. Public Health 2022, 19, 4241.	2022	Safe-and-sustainable-by-design (SSbD) is a concept that takes a systems approach by integrating safety, sustainability, and functionality throughout a product’s the life cycle. This paper proposes a framework based on a prospective life cycle assessment for early safety and sustainability assessment. The framework’s purpose is to identify environmental sustainability and toxicity hotspots early i…		X			added through snowballing			added through snowballing
van de Poel, I; Robaey, Z	Safe-by-Design: from Safety to Responsibility	NANOETHICS (11)3	2017	Safe-by-design (SbD) aims at addressing safety issues already during the R&D and design phases of new technologies. SbD has increasingly become popular in the last few years for addressing the risks of emerging technologies like nanotechnology and synthetic biology. We ask to what extent SbD approaches can deal with uncertainty, in particular with indeterminacy, i.e., the fact that the actual saf…	10.1007/s11569-017-0301-x				X			Not relevant for this review as it does not focus on safety itself, but rather of ethical and philosophical aspects of "safety".
van der Berg, JP; Kleter, GA; Battaglia, E; Bouwman, LMS; Kok, EJ	Application of the Safe-by-Design Concept in Crop Breeding Innovation	INTERNATIONAL JOURNAL OF ENVIRONMENTAL RESEARCH AND PUBLIC HEALTH (17)17	2020	The present paper proposes the application of the safe-by-design concept to crop breeding innovation with the aim to accommodate safety considerations for new agricultural food and feed products. Safe-by-design can be implemented in all stages of the innovation cycle of agricultural products, from the early stages of research and development towards the post-market stage. Our proposed application…	10.3390/ijerph17176420			X
van Gelder, P; Klaassen, P; Taebi, B; Walhout, B; van Ommen, R; van de Poel, I; Robaey, Z; Asveld, L; Balkenende, R; Hollmann, F; van Kampen, EJ; Khakzad, N; Krebbers, R; de Lange, J; Pieters, W; Terwel, K; Visser, E; van der Werff, T; Jung, D	Safe-by-Design in Engineering: An Overview and Comparative Analysis of Engineering Disciplines	INTERNATIONAL JOURNAL OF ENVIRONMENTAL RESEARCH AND PUBLIC HEALTH (18)12	2021	In this paper, we provide an overview of how Safe-by-Design is conceived and applied in practice in a large number of engineering disciplines. We discuss the differences, commonalities, and possibilities for mutual learning found in those practices and identify several ways of putting those disciplinary outlooks in perspective. The considered engineering disciplines in the order of historically g…	10.3390/ijerph18126329						Not so relevant for this review, since rather on an overview of SbD in engineering practices
Varsou, DD; Afantitis, A; Tsoumanis, A; Melagraki, G; Sarimveis, H; Valsami-Jones, E; Lynch, I	A safe-by-design tool for functionalised nanomaterials through the Enalos Nanoinformatics Cloud platform	NANOSCALE ADVANCES (1)2	2019	Multi-walled carbon nanotubes are currently used in numerous industrial applications and products, therefore fast and accurate evaluation of their biological and toxicological effects is of utmost importance. Computational methods and techniques, previously applied in the area of cheminformatics for the prediction of adverse effects of chemicals, can also be applied in the case of nanomaterials (…	10.1039/c8na00142a			X		X
Vaz, MB; Vitorino, C; Sousa, JJS	Safe-by-design development of a topical patch for drug delivery	BRAZILIAN JOURNAL OF PHARMACEUTICAL SCIENCES (56)	2020	Few topical products have been developed specifically to treat acute and chronic arthritis and inflammation, using non-steroidal anti-inflammatory drugs (NSAIDs). The lack of dosing accuracy commonly found in locally applied semisolid products for cutaneous use is a critical issue that leads to treatment failure. The aim of the present work is to develop a differentiated and innovative topical pa…	10.1590/s2175-97902020000118629			X
Vazquez, D; Quirante, N; Ruiz-Femenia, R; Fernandez, MJ; Salcedo-Diaz, R; Gomez-Rico, MF; Caballero, JA	Systematic Methods for Inherently Safer Process Design: Comparison among Inherent Safety Indexes by Dimensionality Reduction	27TH EUROPEAN SYMPOSIUM ON COMPUTER AIDED PROCESS ENGINEERING, PT A (40A)	2017	In this paper, we introduce inherent safety in the design of chemical processes. We selected three safety index with different characteristics, together with the total annualized cost. While the interpretation of results in a large multidimensional space is difficult we propose an objective reduction through a Principal Component Analysis (PCA). The multiobjective optimization of a distillation c…	10.1016/B978-0-444-63965-3.50208-7					X		Not relevant for this review since this paper focuses on "Dow’s Fire and Explosion Index, F&EI (American Institute of Chemical Engineers, 1994) and the Safety Weighted Hazard Index, SWeHI (Khan et al., 2001), as inherent safety indexes (ISI)." These are both not chemical-related.
Veedhi, S; Sawant, A	Designing a safer process for the reaction of TFA with sodium borohydride in THF by calorimetric technique	JOURNAL OF THERMAL ANALYSIS AND CALORIMETRY (111)2	2013	Reaction of TFA with sodium borohydride in THF is a loss of thermal control involving the evolution of Hydrogen gas. The investigation of the process by RC1e and ARSST showed that the criticality class of the reaction is dependant on the addition of TFA. Heat of reaction (Q (r)), adiabatic temperature rise (Delta T (ad)), and MTSR data are obtained from RC1e experiment. Exothermic onset temperatu…	10.1007/s10973-012-2514-0			X
Verevkin, N; Lavrentyev, E; Chernyaev, I; Gurin, D	Method of Providing Safe Technical Condition of Vehicles by Technological Design of Enterprises	12TH INTERNATIONAL CONFERENCE - ORGANIZATION AND TRAFFIC SAFETY MANAGEMENT IN LARGE CITIES SPBOTSIC-2016 (20)	2017	The problem of minimization of impact of vehicles' technical condition (V) and technological design of the production base for motor transport enterprises (MTEs) on the road traffic accident rate is investigated in the article. It is shown that the deterministic cycle method, used in practice, possesses low efficiency for small MTEs as well as for service stations maintaining their rolling stock.…						X
Viela, F; Navarro-Baena, I; Jacobo-Martin, A; Hernandez, JJ; Boyano-Escalera, M; Osorio, MR; Rodriguez, I	Nano-engineering safer-by-design nanoparticle based moth-eye mimetic bactericidal and cytocompatible polymer surfaces	RSC ADVANCES (8)40	2018	Nanotechnology provides a new design paradigm for alternative antibacterial strategies in the fight against drug-resistant bacteria. In this paper, the enhanced bactericidal action of moth-eye nanocomposite surfaces with a collaborative nanoparticle functional and topography structural mode of action is reported. The moth-eye nanocomposite surfaces are fabricated in combined processing steps of n…	10.1039/c8ra03403f			X
Vukosavljev, M; Kroeze, Z; Schoellig, AP; Broucke, ME	A Modular Framework for Motion Planning Using Safe-by-Design Motion Primitives	IEEE TRANSACTIONS ON ROBOTICS (35)5	2019	In this paper, we present a modular framework for solving a motion planning problem among a group of robots. The proposed framework utilizes a finite set of low-level motion primitives to generate motions in a gridded workspace. The constraints on allowable sequences of motion primitives are formalized through a maneuver automaton. At the high level, a control policy determines which motion primi…	10.1109/TRO.2019.2923335					X
Weyell, P; Kurland, HD; Hulser, T; Grabow, J; Muller, FA; Kralisch, D	Risk and life cycle assessment of nanoparticles for medical applications prepared using safe- and benign-by-design gas-phase syntheses	GREEN CHEMISTRY (22)3	2020	Laser vaporisation is a promising technology for the industrial manufacturing of spherical, oxidic nanoparticles, including crystalline, less-agglomerated ferromagnetic maghemite (gamma-Fe2O3) and superparamagnetic gamma-Fe2O3/amorphous SiO2 composite nanoparticles. These can be utilised in medical applications such as contrast agents in magnetic resonance imaging (MRI) and may replace common con…	10.1039/c9gc02436k			X
Williams, S	Briefing: Network Rail Safe by Design: Buildings and Civils Working Group, UK	PROCEEDINGS OF THE INSTITUTION OF CIVIL ENGINEERS-FORENSIC ENGINEERING (171)1	2018	Irrespective of what is designed, safety is an integral part of the design process. Practitioners need to understand what influences safe design, look at hazards and then adapt their processes, and more importantly their behaviours, to make it instinctive. Design must consider safety over the whole project life cycle, from inception to development, implementation, commissioning, operation and mai…	10.1680/jfoen.17.00015					X
Winkler, DA	Issues for and Examples of Computational Design of Safe-by-Design Nanomaterials	COMPUTATIONAL NANOTOXICOLOGY: CHALLENGES AND PERSPECTIVES ()	2019	The interactions of nanomaterials with biological systems are exceedingly complex and multifactorial. While a detailed understanding of the myriad of processes that occur when a nanoparticle enters the body that lead to a possible adverse effect is not possible, data-driven statistical and machine learning modeling methods (nano-QSAR models) can capture enough of the complexity to help make usefu…							Publication could not be found
Wolska-Pietkiewicz, M; Tokarska, K; Grala, A; Wojewodzka, A; Chwojnowska, E; Grzonka, J; Cywinski, PJ; Kruczala, K; Sojka, Z; Chudy, M; Lewinski, J	Safe-by-Design Ligand-Coated ZnO Nanocrystals Engineered by an Organometallic Approach: Unique Physicochemical Properties and Low Toxicity toward Lung Cells	CHEMISTRY-A EUROPEAN JOURNAL (24)16	2018	The unique physicochemical properties and biocompatibility of zinc oxide nanocrystals (ZnO NCs) are strongly dependent on the nanocrystal/ligand interface, which is largely determined by synthetic procedures. Stable ZnO NCs coated with a densely packed shell of 2-(2-methoxyethoxy)acetate ligands, which act as miniPEG prototypes, with average core size and hydrodynamic diameter of 4-5 and about 12…	10.1002/chem.201704207			X
Wong, CK	Designs for Safer Signal-Controlled Intersections by Statistical Analysis of Accident Data at Accident Blacksites	IEEE ACCESS (7)	2019	This paper describes the collection and statistical analysis of accident counts and intersection layout geometries at a range of signal-controlled intersections, with the aim of improving safety at these sites. Negative binomial regression analysis is conducted to relate the accident count data as a dependent variable, with various independent variables to capture the intersection layout and lane…	10.1109/ACCESS.2019.2928038					X
Yan, L; Zhao, F; Wang, J; Zu, Y; Gu, ZJ; Zhao, YL	A Safe-by-Design Strategy towards Safer Nanomaterials in Nanomedicines	ADVANCED MATERIALS (31)45	2019	The marriage of nanotechnology and medicine offers new opportunities to fight against human diseases. Benefiting from their unique optical, thermal, magnetic, or redox properties, a wide range of nanomaterials have shown potential in applications such as diagnosis, drug delivery, or tissue repair and regeneration. Despite the considerable success achieved over the past decades, the newly emerging…	10.1002/adma.201805391						Not relevant for this review. Article is not so much on methods, rather "an overview of the principles in developing safe-by-design nanomaterials for medical applications and of the recent progress in this field is provided".
Yan, LA; Zhao, F; Li, SJ; Hu, ZB; Zhao, YL	Low-toxic and safe nanomaterials by surface-chemical design, carbon nanotubes, fullerenes, metallofullerenes, and graphenes	NANOSCALE (3)2	2011	The toxicity grade for a bulk material can be approximately determined by three factors (chemical composition, dose, and exposure route). However, for a nanomaterial it depends on more than ten factors. Interestingly, some nano-factors (like huge surface adsorbability, small size, etc.) that endow nanomaterials with new biomedical functions are also potential causes leading to toxicity or damage …	10.1039/c0nr00647e			X
Zaini, D; Pasha, M; Kaura, S	Inherently Safe Heat Exchanger Network Design by Consequence Based Analysis	PROCEEDING OF 4TH INTERNATIONAL CONFERENCE ON PROCESS ENGINEERING AND ADVANCED MATERIALS (ICPEAM 2016) (148)	2016	The failure of heat exchangers is an acute problem being experienced by chemical process industries. The loss of containment from this failure can cause enormous destruction and monetary loss in industries. The failure frequency of the heat exchanger network can be substantially improved through the inherently safer design. Moreover, integration between process design stages with risk and consequ…	10.1016/j.proeng.2016.06.500					X
Zheng, RX; Zhang, HY	Regulation of Electronic Properties of Metal Oxide Nanoparticles to Reveal Their Toxicity Mechanism and Safe-by-Design Approach	ADVANCED BIOLOGY (5)2	2021	Metal oxide (MO) nanoparticles (NPs) are widely applied to medicine, agriculture, industry, and other fields, however, their potential toxicity is often concerned. Various toxicological studies are carried out to investigate the toxicity and underlying mechanism of MO NPs. A series of physicochemical properties of MO NPs, such as primary size, charge, solubility, crystal structure, crystalline ph…	10.1002/adbi.202000220					X
Ziegler, M; Aulbach, B	Universal Design Charts for the Safe Verification of Resistance to Failure by Hydraulic Heave	WASSERWIRTSCHAFT (100)4	2010	As the use of prevalent calculation methods for the proof of safety against hydraulic heave often leads to unsafe results extensive investigations about the safety against hydraulic heave have been carried out at the chair of geotechnical engineering at RWTH Aachen University. As a result of these investigations dimensionless design charts based on the analysis of flow nets have been developed in…						X

## Sheet: 4. Second screening
Source					Criteria
Authors	Title	Journal, Volume, Issue	year	Abstract	Definition of SbD and/or SSbD	Chemicals, materials, or products?	Which LC is considered: chemical or product?	Methods linked to SbD/SSbD	Working method proposed?	Excluded because ....
Second screening exclusions (reason for exclusion, see column K)
Anastas, PT; Zimmerman, JB	Safer by Design	GREEN CHEMISTRY (18)16	2016		na	chemicals	na	na	na	This is only a short editorial to a special issue on Safer by Design
Borges, T; Silva, MJ; Louro, H	Moving towards a safe by design approach for ENM: Linking ENM relevant properties to toxicological concerns	TOXICOLOGY LETTERS (238)2	2015		SbD: "Within the Safe by Design concept, the functionality of a material and its toxicity are considered in an integrated way."	Nano. Materials; ENM, nanoparticles (NPs) Products (1 hit): "across the life cycle of the target NP and products." Material(s) (2 hits): "Within the Safe by Design concept, the functionality of a material and its toxicity are considered in an integrated way." (2x) Chemical (0 hit): Conclusion: material and product not explicitly defined but and some confusing use (italics) since toxicity rather r…	ENM chemical	na	na	Not relevant since this is an abstract of a presentation only and no paper. "The central goal of this presentation is to discuss […]".
Bouchaut, B; Asveld, L	Safe-by-Design: Stakeholders' Perceptions and Expectations of How to Deal with Uncertain Risks of Emerging Biotechnologies in the Netherlands	RISK ANALYSIS (40)8	2020	Advanced gene editing techniques such as Clustered Regularly Interspaced Short Palindromic Repeat (CRISPR)/Cas have increased the pace of developments in the field of industrial biotechnology. Such techniques imply new possibilities when working with living organisms, possibly leading to uncertain risks. In the Netherlands, current policy fails to address these uncertain risks because risk classi…	SbD only: "SbD is an engineering concept for risk management that originated in the field of chemical engineering and is heavily applied in the field of nanotechnology (Kelty, 2009; Schwarz-Plaschg, Kallhoff, & Eisenberger, 2017; van de Poel & Robaey, 2017). SbD comprises both engineered and procedural safety (Khan & Amyotte, 2003), and is usually referred to as “reducing or eliminating hazards b…	Materials and process conditions whereby materials is defined as "e.g., chemicals or nanomaterials". Also some very confusing statements on chemicals or products: "The choice between two chemical compounds having comparable properties but, for example, different levels of toxicity, can be made in a quantifiable way. Regarding safety, the compound having the lower level of toxicity would be prefer…	LC not mentioned at all	Only Risk Assessment mentioned and as that poses problems for designers as information is missing in that stage, the authors mention the role of stakeholder involvement to achieve clarity on "(1) diverging expectations with regard to safety and risks, and to establish an acceptable level of risk" [...] "and (3) unclarity in allocating responsibilities to stakeholders in the development process of…	na	"Literature regarding SbD in the context of chemical engineering or nanotechnology assumes that there is (adequate) knowledge of the used chemicals or nanomaterials (Nau & Scholz, 2019) and that safety can be treated like a property of materials or products. However, the actual usage of such materials in later stages is hereby excluded (Schwarz-Plaschg et al., 2017). Therefore, for cutting-edge t…
Bouchaut, B; Asveld, L; Hanefeld, U; Vlierboom, A	Value Conflicts in Designing for Safety: Distinguishing Applications of Safe-by-Design and the Inherent Safety Principles	INTERNATIONAL JOURNAL OF ENVIRONMENTAL RESEARCH AND PUBLIC HEALTH (18)4	2021	Although both the Inherent Safety Principles (ISPs) and the Safe-by-Design (SbD) approach revolve around the central value of safety, they have a slightly different focus in terms of developing add-on features or considering initial design choices. This paper examines the differences between these approaches and analyses which approach is more suitable for a specific type of research-fundamental …	"Safe-by-Design (SbD) is an approach for (experimental) process design focusing on procedural and technical risk management". "Inherent Safety Principles (ISPs) [...] In the field of chemical engineering, in particular, the ISPs are widely known [6] and aim at eliminating or minimizing the risks of hazardous chemicals or syntheses by using conditions or chemicals with less dangerous properties." …	"the adverse effects of materials in the technology’s design process"	LC not mentioned at all	Not really as only "risk assessor" is mentioned, not even RA.	na	This study is more focusing on an ethical value discussion of IPS versus SbD: "Although both the Inherent Safety Principles (ISPs) and the Safe-by-Design (SbD) approach revolve around the central value of safety". "This study entails an empirically informed conceptual analysis, meaning that the conducted interviews mostly functioned to gain understanding of the relevant context (i.e., miniaturize…
Boulanger, P; Belkadi, L; Descarpentries, J; Porterat, D; Hibert, E; Brouzes, A; Mille, M; Patel, S; Pinault, M; Reynaud, C; Mayne-L'Hermite, M; Decamps, JM	Towards large scale aligned carbon nanotube composites: an industrial safe-by-design and sustainable approach	NANOSAFE 2012: INTERNATIONAL CONFERENCES ON SAFE PRODUCTION AND USE OF NANOMATERIALS (429)	2013	We present the main results demonstrating the feasibility of high surface (> A4 format size) semi-industrial fabrication of composites embedding VACNT in organic matrices. The process of growing VACNT exhibits several advantages regarding safety issues: integrating de facto a safe collecting procedure on the substrate, avoiding additional preparation steps and simplifying handling and protection …	na	nanotubes	na	na	na	This is a very weird article. It has safe-by-design and sustainability in the title and also in the title of one of its sections, but nowhere else in the entire manuscript these terms are used or explained. Useless thus!
Brennan, ME; Valsami-Jones, E	Safe by Design for Nanomaterials-Late Lessons from Early Warnings for Sustainable Innovation	NANOETHICS (15)2	2021	The Safe by Design conceptual initiative being developed for nanomaterials offers a template for a new sustainable innovation approach for advanced materials with four important sustainability characteristics. Firstly, it requires potential toxicity risks to be evaluated earlier in the innovation cycle simultaneously with its chemical functionality and possible commercial applications. Secondly, …	SbD only: "Safe by Design (SbD) conceptual approach, with its emphasis on early safety warnings, shared responsibility for sustainable outcomes, and supported by a new social contract, can assist in preventing future crises"	products, NMs	na	na	na	This is commentary on the procedural, ethical, legislative and stakeholder aspects of SbD, without defining it, mixing up terms as SbD, safe and sustainable etc.
Caldeira, C. Farcal, R., Moretti, C., Mancini, L., Rauscher, H., Rasmussen, K., Riego Sintes, J., Sala, S.	Review of safety and sustainability dimensions, aspects, methods, indicators, and tools	JRC Report D2 for SbD EU network	2022	In the context of the EU Green Deal, the Chemicals Strategy for Sustainability (CSS) aims at improving the safeguard of human health and the environment as part of an ambitious approach to tackle pollution from all sources and move towards zero-pollution for air, water and soil. A key action defined in the CSS is the development of safe and sustainable by design (SSbD) criteria for chemicals. The…						This reference is excluded because it is a review of studies that we are reviewing in this article too. We focus here on the studies themmselves and apply different review criteria.
Delfabbro, P; Parke, J; Dragecvic, S; Percy, C; Bayliss, R	Safer by design: Building a collaborative, integrated and evidence-based framework to inform the regulation and mitigation of gambling product risk	JOURNAL OF GAMBLING ISSUES ()48	2021	Evidence suggests that harms may result from gambling participation as a result of a complex interaction between individual differences among consumers, environ-mental factors, and the characteristics of the gambling product. The latter of these factors, broadly referred to in this paper as product risk, has received increased policy attention in recent years. Product-focussed approaches to harm …	not relevant, is about "gambling" :-)	not relevant, is about "gambling" :-)	not relevant, is about "gambling" :-)	not relevant, is about "gambling" :-)	not relevant, is about "gambling" :-)	not relevant, is about "gambling" :-)
Gulumian, M; Cassee, FR	Safe by design (SbD) and nanotechnology: a much-discussed topic with a prudence?	PARTICLE AND FIBRE TOXICOLOGY (18)1	2021	Safe-by-Design (SbD) has been put forward as a concept to assure that only safe nanomaterials will reach the market and that safety aspects have already been considered in a very early stage of the innovation process. In practice, several laboratory test have been proposed to screen newly developed nanomaterials and nano-enabled products to assess their hazardous nature. These tests need to have …	SbD only: "Safe-by-Design (SbD) has been put forward as a concept to assure that only safe nanomaterials will reach the market and that safety aspects have already been considered in a very early stage of the innovation process." "The concept of SbD envisages including safety into innovation from the design phases and early development of a new nanomaterial or nano-enabled products, instead of co…	nanomaterials (NMs). Term "product" is also used once but refers to NMs again. Products (14 hits): Material(s) (16 hits): Chemical (10 hits): Conclusion: chemical, material and product not explicitly defined but quite consistently used except for italics since toxicity rather refers to a chemical instead of a material.	The term LC is not used but the approach is the same: "risks at different stages of the development of nanomaterials. This includes the synthesis (safe material/product), processing, handling, and incorporation into products (safe production) stages, and finally to their disposal at end-of-life cycle (safe use and end of life)." The authors use a bit of a weird combination of EoL and life cycle w…	RA only	na	Editorial focusing on nanomaterials toxic safety
Hendershot, DC	Inherently safer chemical process design	J. Loss Prev. Process Ind. Vol. IO. No. 3. pp. 151-157, 1997	1997	Inherently safer product, process and plant design represents a fundamentally different approach to safety in chemical manufacturing. The process designer is challenged to identify ways to eliminate the hazards associated with the process, rather than to develop add-on barriers to protect people from the hazards of the manufacturing process and its materials. This is best accomplished early in th…	na	chemicals	"process life cycle": In this article life cycle refers to the development life cycle of a process or technology (like in the Collingridge dilemma): "Begin to search for inherently safer process options early in the process life cycle, and never stop. The greatest potential opportunities for impacting process design occur early in the invention and development of processes. As stated by the Natio…	risk analysis is mentioned once, that's all.	na
Ishmaev, G; Vermaas, PE; Hoeneveld, D; van Gelder, P	Safe by Design Regulation for Academic Experimentation and Value Conflicts: An Exploration of Solution Directions	INTERNATIONAL JOURNAL OF ENVIRONMENTAL RESEARCH AND PUBLIC HEALTH (18)4	2021	In this paper, we explore solution directions for the implementation of Safe by Design (SbD) in safety regimes for academic experimentation. SbD is a dynamic and anticipatory strategy for safety regulation in academic research. In this strategy, safety is taken in a broader sense including not only issues of technical precaution of avoiding risks of experimentation but also the societal responsib…	SbD only but more a "social" interpretation: "Safe by Design (SbD) is a dynamic and anticipatory strategy for safety regulation in academic research taking a prominent place in a variety of research fields and disciplines. The primary focus of SbD is human well-being and environmental protection, thus, it aims to support a clean, healthy and safe environment. Safe by Design thus, not only means a…	All three terms - chemical, material and product - are used, mixed and not explicitly defined.	Quite confusing again. Processes, technologies, materials, and products without any specific definition of what is meant with that and what possible difference could exist: "(“Safety design” is the concept of applying methods to minimise occupational hazards early in the design process, with an emphasis on optimising employee health and safety throughout the life cycle of materials and processes)…	Not really discussed: term "risk assessment" is mentioned only once: "design flaws in the roof structure and failure of risk assessment models to account for strong winds"		Not relevant for this review since it's focused on ethical/value aspects for SbD and on the laboratory practices. SbD is here thus defined as "a dynamic and anticipatory strategy for safety regulation in academic research. In this strategy, safety is taken in a broader sense including not only issues of technical precaution of avoiding risks of experimentation but also the societal responsibility…
Ivask, A; Juganson, K; Bondarenko, O; Visnapuu, M; Kasemets, K; Kahru, A	Safe-by-design and toxic-by design, two approaches for design of novel functional nanomaterials	TOXICOLOGY LETTERS (229)	2014	Nanotechnologies have big expectations in almost every industrial domain, from energy production to medicine or food. According to US Project on Emerging Nanotechnologies (http://www.nanotechproject.org/consumerproducts) and Danish Nanodatabase (http://nanodb.dk/) there are more than one thousand nanomaterial-containing consumer products available on the market today. The great expectations for n…	na	NMs	na	na	na	This is an abstract announcing a paper but the paper itself cannot be found (same as another one above). However, the papers seems not relevant for this review based on the abstract as it is not defining and discussing SbD conceptually but rather a case study.
Jantunen, P; Rauscher, H; Sintes, JR; Rasmussen, K	Commentary on Safe(r) by design implementation in the nanotechnology industry [NanoImpact 20 (2020) 100267] and Integrative approach in a safe by design context combining risk, life cycle assessment and socio-economic assessment for safer and sustainable nanomaterials [NanoImpact 23 (2021) 100335]	NANOIMPACT (24)	2021	Commentary on two recent papers published in NanoImpact Safe(r) by design implementation in the nano -technology industry and Integrative approach in a safe by design context combining risk, life cycle and socio-economic assessment for safer and sustainable nanomaterials.	SbD only: "Safe(r)-by-Design (SbD) refers to reducing the various types of risks of materials, products and constructions at the design stage. The OECD’s Working Party on Manufactured Nanomaterials has recently proposed a working description of SbD in the context of nanotechnology: “The SbD (Safe-by-Design, Safer-by-Design, or Safety-by-Design) concept refers to identifying the risks and uncertai…	materials, products and constructions	only mentioned as part of "life cycle assessment"	RA, LCA, Socio-Economic Assessment (SEA)	"An integrated approach striving, at the same time, for both safety and sustainability in material and product design would therefore be beneficial; for the best results, an integrative and holistic, rather than sequential, approach to safety and sustainability from an early stage of development should be sought (Gottardo et al., 2021). The practicalities of such an approach are still finding sha…	This is a commentary on Sánchez Jiménez et al. (2021) and Salieri et al. (2020). Jantunen et al. argue that the above mentioned authors strive for a sequantial approach adding LCA and SEA after SbD, while they argue that it would be better to strive for "An integrated approach striving, at the same time, for both safety and sustainability in material and product design would therefore be benefici…
Johnson, L; Aglas, L; Soh, WT; Geppert, M; Hofer, S; Hofstaetter, N; Briza, P; Ferreira, F; Weiss, R; Brandstetter, H; Duschl, A; Himly, M	Structural Alterations of Antigens at the Material Interface: An Early Decision Toolbox Facilitating Safe-by-Design Nanovaccine Development	INTERNATIONAL JOURNAL OF MOLECULAR SCIENCES (22)19	2021	Nanomaterials have found extensive interest in the development of novel vaccines, as adjuvants and/or carriers in vaccination platforms. Conjugation of protein antigens at the particle surface by non-covalent adsorption is the most widely used approach in licensed particulate vaccines. Hence, it is essential to understand proteins' structural integrity at the material interface in order to develo…	Only SbD but not defined	not relevant, is about vaccines	na	na	na	not relevant, is about vaccines
Lin, SJ; Yu, TY; Yu, ZY; Hu, XL; Yin, DQ	Nanomaterials Safer-by-Design: An Environmental Safety Perspective	ADVANCED MATERIALS (30)17	2018	Designing safer nanomaterials and nanostructures has gained increasing attention in the field of nanoscience and technology in recent years. Based on the body of experimental evidence contributed by environmental health and safety studies, materials scientists now have a better grasp on the relationships between the nanomaterials' physicochemical characteristics and their hazard/safety profiles. …	SbD only: "Although the idea of “Safer-by-Design” is relatively new in the field of nanoscience and technology, first appeared in the literature around 2008, similar concepts have been previously implemented to encourage conscious design to avoid the potential adverse effect of chemicals and pharmaceuticals." "It can be seen that starting from the very beginning, ensuring safety and minimizing to…	nanomaterials Products (1 hit): "it is clearly stated that the quality should be built into a product with the knowledge of the risks involved and how best to mitigate those risks" Material(s) (6 hits): "nanomaterials"; "novel materials"; "materials sciences/scientists" Chemical (4 hits): "physicochemical characteristics"; "chemicals and pharmaceuticals"; "chemical exposure"; "chemically modified…	Term life cycle does not appear at all in this article.	No methods mentioned, but only safety and toxicity are discussed in this article.	no, but the authors think it will emerge automatically: "With the anticipated continuous efforts on creating safer nanomaterials, we believe a set of criteria, principles, and methodologies will gradually emerge for nanomaterials safer-by- design."	Interestingly, the authors of this article use "safer-by-design" instead of "safe-by-design", which makes a lot of sense and is comparable to the difference between "sustainable" and "more sustainable". However, the term 'life cycle' does not appear in the article and therefore it's excluded from further review.
Packroff, R; Marx, R	Safe and Sustainable by Design-An Interdisciplinary Challenge for Future-Proof Chemistry	CHEMPLUSCHEM ()	2022	Advanced materials (such as the TiO2 fibers shown) are important building blocks for a post-fossil circular economy that is fostered by the Horizon Europe research framework programme from 2021 to 2026. Rolf Packroff and Romy Marx outline how this increases the need for scientists in material development to address issues of safe and sustainable design, as well as interdisciplinary cooperation wi…	Only SSbD is implicilty defined referring to the EU'strategy for sustainable chemistry: advanced materials "should be tailored to specific performance profiles. Beyond this, they are also intended to be designed generation-friendly and safe for humans and the environment over their entire life cycle." Safe and Sustainable by Design (Figure 1) is a key requirement in the EU Commission’s strategy f…	chemicals mainly Products (6 hits): Material(s) (16 hits): Chemical (10 hits): Conclusion: chemical, material and product not explicitly defined but quite consistently used except for italics since toxicity rather refers to a chemical instead of a material.	Material life cycle is mentioned, see column F. The second time that the term "life cycle" is mentioned, it is unclear which life cycle it refers to: "The assessment of frequent and repetitive exposure in the life-cycle, in particular in occupational settings, is neglected."	RA and LCA. LCA only mentioned once, while arguing for a broad scope of impact catgeories which of course is very good :-): "Lifecycle assessment (LCA) is often shortened to carbon footprint. The assessment of frequent and repetitive exposure in the life-cycle, in particular in occupational settings, is neglected."	no	Editorial, thus excluded. Plea for early SSbD: "Which scientist, which research institution, and which company will take responsibility for a second asbestos disaster?"
Robaey, Z; Spruit, SL; van de Poel, I	The Food Warden: An Exploration of Issues in Distributing Responsibilities for Safe-by-Design Synthetic Biology Applications	SCIENCE AND ENGINEERING ETHICS (24)6	2018	The Safe-by-Design approach in synthetic biology holds the promise of designing the building blocks of life in an organism guided by the value of safety. This paves a new way for using biotechnologies safely. However, the Safe-by-Design approach moves the bulk of the responsibility for safety to the actors in the research and development phase. Also, it assumes that safety can be defined and unde…	SbD only and only as the stakeholder procedural part of the approach: "The Safe-by-Design approach, as a way to deal with the potential risks of SynBio applications, seems to come with specific assumptions about which actors are"responsible for properly addressing the risks of these technologies." SSbD and sustainability not mentioned.	Article deals with SynBio: "Synthetic biology (SynBio) is an emerging field that combines principles of the life sciences together with principles of engineering disciplines."	term "life cycle" not mentioned at all.	Procedural and workshop methods such as "anonymous and nonanonymous deliberation methods" and "the group decision room" etc.	na	Reports a stakeholder workshop and is not about chemicals or materials as such, but rather on ethics and procedures, therefore not so relevant for this review.
Schuster, F; Lomello, F	From Safe Nanomanufacturing to Nanosafe-by-Design processes	NANOSAFE 2012: INTERNATIONAL CONFERENCES ON SAFE PRODUCTION AND USE OF NANOMATERIALS (429)	2013	Industrial needs in terms of multifunctional components are increasing. Many sectors are concerned, from the integrated direct nanoparticles production to the emerging combinations which include the metal matrix composites (MMC), ductile ceramics and ceramic matrix composites, polymer matrix composites (PMC) for bulk application and advanced surface coatings in the fields of automotive, aerospace…	na	nano	Only mentioned in the Introduction: "CEA took profit on its safety culture knowledge inherited from the nuclear field, in order to carry out multidisciplinary scientific studies regarding the risk assessment related to human health, the environment, final workers and costumers at all stages of the life cycle of nanotechnology. This life cycle involves the starting at the point of conception and i…			This paper presents a case study only, and is therefore excluded from further review.
Soeteman-Hernandez, LG; Blab, GA; Carattino, A; Dekker, F; Dekkers, S; van der Linden, M; van Silfhout, A; Noorlander, CW	Challenges of implementing nano-specific safety and safe-by-design principles in academia	NANOIMPACT (19)	2020	Safe-by-design is an essential component for creating awareness of the potential novel risks associated with the introduction of sophisticated nanomaterials (NMs) with novel properties. SbD is also a useful tool for meeting EU policy ambitions such as the European Green Deal which includes circular economy and moving towards a zero pollution (pollution-free) environment. Unidentified risks are a …						This is one of the many EU Nanoreg2 publication, but this one is not relevant for this revew since it is mainly about the results of a workshop aiming to give guidance to designers.
Suraud, MG	From Safe by Design to Scientific Changes: Unforeseen Effects of Controversy Surrounding Nanotechnology in France	NANOETHICS (13)2	2019	Based on fieldwork, this article highlights the unexpected effects of controversies about nanotechnology in France. These controversies stem in particular from a strong challenge to the field by civil society protests and criticism concerning environmental and health risks. One reason for this challenge is the specific difficulties in assessing the toxicity and ecotoxicity of nanomaterials. Civil…						not relevant for this review since it reflects an opinion on how, or how not, SbD can contribute a French discussion on nanoproducts.
Tarantini, A; Wegner, KD; Dussert, F; Sarret, G; Beal, D; Mattera, L; Lincheneau, C; Proux, O; Truffier-Boutry, D; Moriscot, C; Gallet, B; Jouneau, PH; Reiss, P; Carriere, M	Physicochemical alterations and toxicity of InP alloyed quantum dots aged in environmental conditions: A safer by design evaluation	NANOIMPACT (14)	2019	Due to their unique optical properties, quantum dots (QDs) are used in a number of optoelectronic devices and are forecasted to be used in the near future for biomedical applications. The most popular QD composition consists of cadmium selenide (CdSe) or cadmium telluride (CdTe), which has been shown to pose health risks due to the release of toxic cadmium (Cd) ions. Due to similar optical proper…	SbD only: "The core of this concept is the integration of safety considerations in the design of nanomaterials or nano-enabled products, to make sure that these products will have a low risk potential from their production until their end-of-life."	NEPs and NMs	LC is only mentioned once: "Therefore, to take into account the whole life cycle of these products, their physicochemical transformation and toxicity should be also assessed after exposing them to UV light, in environmental conditions."		na	This paper presents a case study only, and is therefore excluded from further review.
van de Poel, I; Robaey, Z	Safe-by-Design: from Safety to Responsibility	NANOETHICS (11)3	2017	Safe-by-design (SbD) aims at addressing safety issues already during the R&D and design phases of new technologies. SbD has increasingly become popular in the last few years for addressing the risks of emerging technologies like nanotechnology and synthetic biology. We ask to what extent SbD approaches can deal with uncertainty, in particular with indeterminacy, i.e., the fact that the actual saf…	SbD only: "The concept of SbD can be understood in at least three different ways. One, it may be understood as an approach to risk analysis or risk assessment, implying that risks are already assessed in the design phase. Two, it may be understood as a specific risk management strategy, i.e., addressing safety by design measures, or by built-in safety. An example is kill switches in synthetic bio…	chemicals mainly	Term life cycle is not used at all!	RA only	na	Uit Bouchaut_Asveld(2020): "designing specifically for the notion of safety by iteratively integrating knowledge about the adverse effects of materials (van de Poel & Robaey, 2017)." Nevertheless, this paper is not relevant for this review as it does not focus on safety itself, but rather on ethical and philosophical aspects of "safety".
van Gelder, P; Klaassen, P; Taebi, B; Walhout, B; van Ommen, R; van de Poel, I; Robaey, Z; Asveld, L; Balkenende, R; Hollmann, F; van Kampen, EJ; Khakzad, N; Krebbers, R; de Lange, J; Pieters, W; Terwel, K; Visser, E; van der Werff, T; Jung, D	Safe-by-Design in Engineering: An Overview and Comparative Analysis of Engineering Disciplines	INTERNATIONAL JOURNAL OF ENVIRONMENTAL RESEARCH AND PUBLIC HEALTH (18)12	2021	In this paper, we provide an overview of how Safe-by-Design is conceived and applied in practice in a large number of engineering disciplines. We discuss the differences, commonalities, and possibilities for mutual learning found in those practices and identify several ways of putting those disciplinary outlooks in perspective. The considered engineering disciplines in the order of historically g…	SbD: "The fundamental idea at the heart of Safe-by-Design is that when innovating, we should try to anticipate risks as much as possible in order to prevent them from happening or to decrease their likelihood because on all relevant measures preventing harm is better than curing its consequences. Thus, we propose that Safe-by-Design can be seen as a heuristic concept that facilitates preventive d…	all three terms are used, mostly chemical	"Safety and security can be addressed at all phases of the life cycle of any product, process, or system".	RA is mentioned 2 times, and LCA only once. The paper is not so much about methods and LCA is only mentioned once: "Today, some of the principles have been standardized in “life cycle analysis” approaches (e.g., ISO 14040:2006), but these require extensive data and are consequently too laborious and costly for researchers. Simpler semi-quantitative methods such as the “E-factor” are available and…	no, rather a overview of SbD in engineering practices	Not relevant for this review, since rather on a overview of SbD in engineering practices.
Vazquez, D; Quirante, N; Ruiz-Femenia, R; Fernandez, MJ; Salcedo-Diaz, R; Gomez-Rico, MF; Caballero, JA	Systematic Methods for Inherently Safer Process Design: Comparison among Inherent Safety Indexes by Dimensionality Reduction	27TH EUROPEAN SYMPOSIUM ON COMPUTER AIDED PROCESS ENGINEERING, PT A (40A)	2017	In this paper, we introduce inherent safety in the design of chemical processes. We selected three safety index with different characteristics, together with the total annualized cost. While the interpretation of results in a large multidimensional space is difficult we propose an objective reduction through a Principal Component Analysis (PCA). The multiobjective optimization of a distillation c…	na	na	na	na	na	Not relevant for this review since this paper focuses on "Dow’s Fire and Explosion Index, F&EI (American Institute of Chemical Engineers, 1994) and the Safety Weighted Hazard Index, SWeHI (Khan et al., 2001), as inherent safety indexes (ISI)." These are both not chemical-related.
Winkler, DA	Issues for and Examples of Computational Design of Safe-by-Design Nanomaterials	COMPUTATIONAL NANOTOXICOLOGY: CHALLENGES AND PERSPECTIVES ()	2019	The interactions of nanomaterials with biological systems are exceedingly complex and multifactorial. While a detailed understanding of the myriad of processes that occur when a nanoparticle enters the body that lead to a possible adverse effect is not possible, data-driven statistical and machine learning modeling methods (nano-QSAR models) can capture enough of the complexity to help make usefu…						Focus on IT
Yan, L; Zhao, F; Wang, J; Zu, Y; Gu, ZJ; Zhao, YL	A Safe-by-Design Strategy towards Safer Nanomaterials in Nanomedicines	ADVANCED MATERIALS (31)45	2019	The marriage of nanotechnology and medicine offers new opportunities to fight against human diseases. Benefiting from their unique optical, thermal, magnetic, or redox properties, a wide range of nanomaterials have shown potential in applications such as diagnosis, drug delivery, or tissue repair and regeneration. Despite the considerable success achieved over the past decades, the newly emerging…	Safe-by-design strategies for nanomedicines are discussed without defining SbD first. SSbD and sustainability not mentioned at all.	nanomedicines	Quite unclear: "Efforts to minimize the toxicities of biomedical nanomaterials could be devoted to diverse stages of their life-cycles" "it is rather important that these nanomaterials are safe enough, while simultaneously maintaining their parental nanomedical functions during their whole life-cycles."	Article is not so much on methods, rather "an overview of the principles in developing safe-by-design nanomaterials for medical applications and of the recent progress in this field is provided".	no	not relevant for this review

## Sheet: 5. Plot of occurrences
				Normalized to'chemical'			ranking on least counts (1=least; …; 3=most hits)
	product	material	chemical	product	material	chemical
Bastus (2018)	6	16	10	0.6	1.6	1	1	3	2
Bottero (2017)	43	16	10	4.3	1.6	1	3	2	1
Caldeira (2020)	90	293	435	0.206897	0.673563	1	1	2	3
Cobaleda-Siles (2017)	13	11	12	1.08333	0.916667	1	3	1	2
Dekkers (2020)	34	30	20	1.7	1.5	1	3	2	1
Furxhi (2022)	19	15	3	6.33333	5	1	3	2	1
Hauschild (2022)	26	29	24	1.08333	1.20833	1	2	3	1
Kraegeloh (2018)	25	25	2	12.5	12.5	1	2	2	1
Labille (2020)	90	21	13	6.92308	1.61538	1	3	2	1
Nguyen (2022)	17	33	7	2.42857	4.71429	1	2	3	1
Pavlicek (2021)	41	96	13	3.15385	7.38462	1	2	3	1
Rose (2021)	12	14	3	4	4.66667	1	2	3	1
Rose (2021)	33	9	2	16.5	4.5	1	3	2	1
Salieri (2021)	38	33	31	1.22581	1.06452	1	3	2	1
Sánchez Jiménez (2020)	18	26	6	3	4.33333	1	2	3	1
Sánchez Jiménez (2022)	37	28	20	1.85	1.4	1	3	2	1
Schmutz (2020)	16	18	3	5.33333	6	1	2	3	1
Semenzin (2019)	71	13	21	3.38095	0.619048	1	3	1	2
Tavernaro (2021)	44	57	19	2.31579	3	1	2	3	1
Tsalidis (2022)	31	34	16	1.9375	2.125	1	2	3	1
